# Supplementary material for: Leveraging the Mendelian disorders of the epigenetic machinery to systematically map functional epigenetic variation
Source: eLife journal article supplement (doi:10.7554/elife.65884), 2021-08-31
Supplement: supp [file elife-65884-supp-v1.zip]

Archive with 18 entries (18 files):
- elife_poa_e65884_Figure_1_figure_supplement_1.pdf
- elife_poa_e65884_Figure_2_figure_supplement_1.pdf
- elife_poa_e65884_Figure_2_figure_supplement_2.pdf
- elife_poa_e65884_Figure_3_figure_supplement_1.pdf
- elife_poa_e65884_Figure_4_figure_supplement_1.pdf
- elife_poa_e65884_Figure_2_source_data_1.csv
- elife_poa_e65884_Figure_2_source_data_2.xlsx
- elife_poa_e65884_Figure_2_source_data_3.xlsx
- elife_poa_e65884_Figure_2_source_data_4.xlsx
- elife_poa_e65884_Figure_2_source_data_5.xlsx
- elife_poa_e65884_Figure_3_source_data_1.xlsx
- elife_poa_e65884_Figure_4_source_data_1.xlsx
- elife_poa_e65884_Figure_4_source_data_2.xlsx
- elife_poa_e65884_Figure_4_source_data_3.xlsx
- elife_poa_e65884_Figure_5_source_data_1.xlsx
- elife_poa_e65884_Figure_5_source_data_2.xlsx
- elife_poa_e65884_Figure_5_source_data_3.xlsx
- elife_poa_e65884_Transparent_Reporting_File.docx
