# Supplementary material for: Leveraging the Mendelian disorders of the epigenetic machinery to systematically map functional epigenetic variation
Source: eLife journal article supplement (doi:10.7554/elife.65884), 2021-08-31
Supplement: supp [file elife-65884-supp-v1.zip › elife_poa_e65884_Figure_2_source_data_1.csv]

chr	start	end	prom_overlapping_id	prom_overlapping_name	logFC_KS1	logFC_KS2	significant_at_FDR_05
chr1	17097140	17098163	ENSMUSG00000042686	Jph1	0.842737723	0.479512575	yes
chr1	20890076	20891551	ENSMUSG00000025931	Paqr8	0.278993496	0.149937575	no
chr1	24099576	24101041	ENSMUSG00000026153	Fam135a	0.488966742	0.555902313	yes
chr1	34010886	34012112	ENSMUSG00000026131	Dst	0.453320655	0.343693878	yes
chr1	36446406	36446689	ENSMUSG00000001143	Lman2l	-0.403131717	-0.193897941	no
chr1	36766358	36767837	ENSMUSG00000026117	Zap70	0.35190205	0.192563664	yes
chr1	40324502	40325624	ENSMUSG00000070942	Il1rl2	0.421901417	0.188446343	no
chr1	42693693	42695184	ENSMUSG00000045515	Pou3f3	0.789467198	0.385001957	yes
chr1	42696121	42696955	ENSMUSG00000045515	Pou3f3	0.709060629	0.412942576	yes
chr1	42952688	42953654	ENSMUSG00000041907	Gpr45	0.701786591	0.731276875	yes
chr1	43163135	43164487	ENSMUSG00000008136	Fhl2	0.579597815	0.199480862	yes
chr1	54250251	54251475	ENSMUSG00000025983	Ccdc150	0.650924637	0.543178473	yes
chr1	56972032	56973812	ENSMUSG00000038331	Satb2	0.345969793	0.399584368	yes
chr1	56977097	56978501	ENSMUSG00000038331	Satb2	0.471782914	0.25029174	yes
chr1	57774713	57775265	ENSMUSG00000038305	Spats2l	1.029.529.473	0.48363438	no
chr1	59481405	59483393	ENSMUSG00000041075	Fzd7	0.246800368	0.195967288	yes
chr1	60565227	60567600	ENSMUSG00000026014	Raph1	0.284645309	0.262478587	yes
chr1	61638418	61639971	ENSMUSG00000052062	Pard3b	1.334.791.936	0.506079648	yes
chr1	66174793	66176157	ENSMUSG00000015222	Map2	0.72130547	0.276171095	yes
chr1	66386576	66387682	ENSMUSG00000015222	Map2	0.670429834	0.403505847	yes
chr1	69686847	69688037	ENSMUSG00000025997	Ikzf2	0.401464991	0.575732867	no
chr1	69688883	69689383	ENSMUSG00000025997	Ikzf2	0.590425531	0.457225936	yes
chr1	71652760	71653449	ENSMUSG00000026193	Fn1	0.898470766	0.833903116	yes
chr1	74124116	74125739	ENSMUSG00000055322, ENSMUSG00000061815	Tns1, Rufy4	0.375723935	0.137886127	yes
chr1	74303464	74304594	ENSMUSG00000006301	Tmbim1	0.259544647	0.313916648	yes
chr1	74375016	74375507	ENSMUSG00000026177	Slc11a1	0.889332612	0.897382047	no
chr1	79857937	79859775	ENSMUSG00000026249	Serpine2	0.368688519	0.230536942	yes
chr1	80213353	80214230	ENSMUSG00000043230	Fam124b	0.654414421	0.243799336	no
chr1	85098468	85098910	ENSMUSG00000073631	Gm10553	-0.289855484	-0.299011493	no
chr1	85109527	85109958	ENSMUSG00000089844	A530032D15Rik	-0.283876803	-0.308579821	no
chr1	85111319	85112168	ENSMUSG00000089844	A530032D15Rik	-0.267772566	-0.189836905	yes
chr1	85962028	85962616	ENSMUSG00000049608	Gpr55	-0.693771834	-0.383615811	yes
chr1	89069535	89071062	ENSMUSG00000036206	Sh3bp4	0.366810642	0.397740064	no
chr1	93235431	93236803	ENSMUSG00000047793	Sned1	0.519113835	0.477675602	yes
chr1	93685577	93686715	ENSMUSG00000026278	Bok	0.54693259	0.361951062	yes
chr1	94052118	94052795	ENSMUSG00000026285	Pdcd1	0.563370239	0.385395064	no
chr1	105356195	105357153	ENSMUSG00000047496	Rnf152	0.512846646	0.261434606	yes
chr1	111864081	111865319	ENSMUSG00000038702	Dsel	0.485943637	0.192254003	no
chr1	118627490	118628457	ENSMUSG00000026380	Tfcp2l1	0.678477328	0.438763075	yes
chr1	119504050	119505367	ENSMUSG00000004451	Ralb	0.227189871	0.126822694	no
chr1	135765635	135766873	ENSMUSG00000041801	Phlda3	0.428357474	0.343326521	yes
chr1	136007238	136008361	ENSMUSG00000051985, ENSMUSG00000026411	Igfn1, Tmem9	0.511824996	0.433916366	yes
chr1	143640548	143641197	ENSMUSG00000033849	B3galt2	0.849737074	0.831029752	yes
chr1	144248685	144249659	ENSMUSG00000026358	Rgs1	0.883176018	0.282943399	yes
chr1	149960752	149962157	ENSMUSG00000056220	Pla2g4a	0.405982234	0.380940901	yes
chr1	154726257	154727429	ENSMUSG00000004110	Cacna1e	0.564094863	0.272173617	yes
chr1	167000269	167001821	ENSMUSG00000060568	Fam78b	0.51723615	0.175008336	yes
chr1	168431558	168432801	ENSMUSG00000052534	Pbx1	0.452346766	0.409028224	yes
chr1	170643997	170645295	ENSMUSG00000038463	Olfml2b	0.43307051	0.167652558	no
chr1	171271784	171272337	ENSMUSG00000052423	B4galt3	-0.443032359	-0.310760776	yes
chr1	174501615	174503833	ENSMUSG00000028354	Fmn2	1.060.342.328	0.370592219	yes
chr1	178527226	178528647	ENSMUSG00000026494	Kif26b	0.529954138	0.341197318	yes
chr1	178530144	178530937	ENSMUSG00000026494	Kif26b	0.709895512	0.215990912	no
chr1	182954582	182955295	ENSMUSG00000079164	Tlr5	0.506375034	0.458740516	no
chr1	189921433	189922790	ENSMUSG00000026603	Smyd2	0.525449461	0.532935521	yes
chr1	193152669	193153693	ENSMUSG00000026638	Irf6	0.33199952	0.23427669	yes
chr1	194618853	194620654	ENSMUSG00000026640	Plxna2	1.015.647.351	0.740406983	yes
chr1	195091629	195092879	ENSMUSG00000016493	Cd46	0.264305887	0.289424725	yes
chr10	3740207	3741539	ENSMUSG00000040624	Plekhg1	0.413363765	0.395057584	no
chr10	4712088	4713167	ENSMUSG00000019768	Esr1	0.626155435	0.500010285	yes
chr10	8885377	8886716	ENSMUSG00000015305	Sash1	0.451878164	0.523530491	yes
chr10	10557380	10558520	ENSMUSG00000019832	Rab32	0.653066774	0.252499575	yes
chr10	11280412	11281937	ENSMUSG00000047648	Fbxo30	0.18946598	0.092109998	no
chr10	11343074	11344116	ENSMUSG00000055493	Epm2a	0.79505779	0.812059796	yes
chr10	18407130	18407923	ENSMUSG00000039835	Nhsl1	0.89550206	0.680467895	yes
chr10	18469010	18470343	ENSMUSG00000039835	Nhsl1	0.904976118	0.457018345	yes
chr10	18545462	18546329	ENSMUSG00000019853	Hebp2	1.096.587.138	0.55390548	yes
chr10	39959706	39960654	ENSMUSG00000071335	G630090E17Rik	0.323780105	0.252179092	yes
chr10	50893614	50895418	ENSMUSG00000019913	Sim1	0.645890422	0.554411997	yes
chr10	52232309	52234601	ENSMUSG00000019891	Dcbld1	0.377436789	0.227359279	yes
chr10	53750585	53751478	ENSMUSG00000019856	Fam184a	0.810053077	0.83648221	yes
chr10	56106480	56107580	ENSMUSG00000047669	Msl3l2	0.566719721	0.468028775	yes
chr10	56377149	56379197	ENSMUSG00000050953	Gja1	1.480.695.731	0.910281903	yes
chr10	60830979	60831796	ENSMUSG00000020099	Unc5b	0.632177057	0.597069824	yes
chr10	67911356	67913042	ENSMUSG00000037855	Zfp365	0.74432427	0.407906011	yes
chr10	74966747	74967746	ENSMUSG00000040009	Gnaz	0.497196694	0.341343582	yes
chr10	75942851	75943345	ENSMUSG00000000903	Vpreb3	-0.674422019	-0.258348289	no
chr10	77901939	77903544	ENSMUSG00000051652	Lrrc3	0.455710391	0.301822355	yes
chr10	79613548	79614312	ENSMUSG00000045912	C2cd4c	0.520430326	0.305277999	no
chr10	80806968	80808049	ENSMUSG00000035262	Amh	0.24577685	0.228735233	no
chr10	81407472	81408042	ENSMUSG00000055053	Nfic	-0.567559225	-0.214686197	yes
chr10	83722080	83723486	ENSMUSG00000087651	1500009L16Rik	0.519318008	0.29766083	yes
chr10	86498373	86499279	ENSMUSG00000059602	Syn3	0.617231016	0.350620776	no
chr10	88356350	88357706	ENSMUSG00000020057	Dram1	0.286242508	0.147352369	yes
chr10	93640679	93642385	ENSMUSG00000020019	Ntn4	0.418133724	0.420858791	no
chr10	100486606	100488288	ENSMUSG00000036676, ENSMUSG00000019971	Tmtc3, Cep290	0.246025523	0.209151396	no
chr10	105573429	105575610	ENSMUSG00000036019	Tmtc2	0.358365965	0.239021474	yes
chr10	108331629	108333800	ENSMUSG00000035873	Pawr	0.594574194	0.500361301	yes
chr10	115586266	115587932	ENSMUSG00000020140	Lgr5	0.588513328	0.439968105	yes
chr10	125965954	125966941	ENSMUSG00000020105	Lrig3	0.929462331	0.670141109	yes
chr10	127188456	127189949	ENSMUSG00000019467	Arhgef25	0.293577925	0.145815706	no
chr11	3863432	3864515	ENSMUSG00000020435	Osbp2	0.490968277	0.384737757	yes
chr11	5861520	5862566	ENSMUSG00000020473	Aebp1	0.442085765	0.249300896	no
chr11	5901793	5902336	ENSMUSG00000041798	Gck	0.771880094	0.544067474	yes
chr11	19018595	19021477	ENSMUSG00000020160	Meis1	0.487495164	0.362163377	yes
chr11	20830310	20832011	ENSMUSG00000042363	Lgalsl	0.28245696	0.214552979	yes
chr11	22000116	22002562	ENSMUSG00000005917	Otx1	0.358153166	0.354083518	yes
chr11	26209681	26211102	ENSMUSG00000032985	5730522E02Rik	0.377476408	0.243631366	yes
chr11	29373182	29374472	ENSMUSG00000032740	Ccdc88a	0.236221654	0.160771378	yes
chr11	30025660	30026429	ENSMUSG00000044072	Eml6	0.946305321	0.62795667	yes
chr11	30266846	30268811	ENSMUSG00000020315	Sptbn1	0.640466862	0.470294857	yes
chr11	32299798	32300498	ENSMUSG00000020295	Hbq1a	0.671714547	0.367950796	yes
chr11	32347190	32348171	ENSMUSG00000040711	Sh3pxd2b	0.698697557	0.758976304	yes
chr11	34689798	34690790	ENSMUSG00000020143	Dock2	-0.982300127	-0.328037904	no
chr11	35119208	35120014	ENSMUSG00000056427	Slit3	-0.481987654	-0.410737159	no
chr11	43528129	43529609	ENSMUSG00000044707	Ccnjl	0.453103945	0.279873342	no
chr11	45849749	45850272	ENSMUSG00000006169	Clint1	0.304461718	0.215661268	no
chr11	45979977	45981245	ENSMUSG00000040489	Sox30	0.422349047	0.524825616	yes
chr11	46165925	46166935	ENSMUSG00000020411	Nipal4	0.384323256	0.220123783	no
chr11	51289391	51290832	ENSMUSG00000063564	Col23a1	0.34125674	0.17043977	yes
chr11	53979368	53980795	ENSMUSG00000063652	Slc22a21	0.418355285	0.135864706	no
chr11	54957000	54957168	ENSMUSG00000020400	Tnip1	-0.630702072	-0.168635489	no
chr11	54962732	54963520	ENSMUSG00000020400	Tnip1	-0.417488133	-0.141370195	no
chr11	59786828	59787945	ENSMUSG00000043648	Pld6	0.375039545	0.178546305	no
chr11	69235132	69236478	ENSMUSG00000020890	Gucy2e	0.323214662	0.282144011	no
chr11	69774293	69775561	ENSMUSG00000018750	Zbtb4	-0.323881485	-0.215515262	no
chr11	70213654	70215659	ENSMUSG00000040938	Slc16a11	0.369846874	0.268326572	yes
chr11	72266121	72267241	ENSMUSG00000020805	Slc13a5	0.598349931	0.337889506	yes
chr11	78465453	78466505	ENSMUSG00000020829	Slc46a1	0.246383971	0.191581014	no
chr11	80300531	80303019	ENSMUSG00000017692	Rhbdl3	0.263976549	0.198464399	no
chr11	89076161	89076832	ENSMUSG00000072553	Gm525	-0.378120145	-0.279874103	yes
chr11	95845050	95845253	ENSMUSG00000038811	Gngt2	-0.685388227	-0.218835432	no
chr11	96464000	96465047	ENSMUSG00000057058	Skap1	-0.630505449	-0.176028922	no
chr11	98018873	98020795	ENSMUSG00000020882	Cacnb1	-0.303593578	-0.328055167	no
chr11	100414090	100415684	ENSMUSG00000006931, ENSMUSG00000001555	Leprel4, Fkbp10	0.396609214	0.317492849	yes
chr11	105589070	105590459	ENSMUSG00000053580	Tanc2	0.39679658	0.395650912	yes
chr11	106200918	106202961	ENSMUSG00000078622	Ccdc47	-0.371564223	-0.147025641	no
chr11	108920074	108921709	ENSMUSG00000000142	Axin2	0.540015685	0.490249376	yes
chr11	109995633	109996063	ENSMUSG00000020620	Abca8b	0.744587981	0.353539042	yes
chr11	111064705	111065346	ENSMUSG00000041695	Kcnj2	0.580761947	0.276747152	yes
chr11	111065527	111066722	ENSMUSG00000041695	Kcnj2	0.438063743	0.424206064	yes
chr11	113565162	113566214	ENSMUSG00000041654	Slc39a11	0.274776926	0.230423378	yes
chr11	115133577	115134521	ENSMUSG00000047798	Cd300lf	-0.386141397	-0.301928413	no
chr11	117325335	117326510	ENSMUSG00000059248	09.sep	-0.278878741	-0.196540869	no
chr11	120948224	120949450	ENSMUSG00000025161	Slc16a3	0.426190479	0.522459812	yes
chr11	120950655	120951387	ENSMUSG00000025161	Slc16a3	0.425589331	0.664124302	no
chr11	121387741	121388756	ENSMUSG00000025170	Rab40b	0.650867596	0.491296897	yes
chr11	121434435	121435449	ENSMUSG00000025175	Fn3k	0.299610549	0.201880523	no
chr12	4038068	4039447	ENSMUSG00000020658	Efr3b	0.333009374	0.298433884	no
chr12	4132694	4133807	ENSMUSG00000020654	Adcy3	0.303483823	0.146173674	yes
chr12	12938780	12941245	ENSMUSG00000037169	Mycn	0.527220134	0.148234498	yes
chr12	12941562	12942991	ENSMUSG00000037169	Mycn	0.366448049	0.232574337	yes
chr12	17324175	17325488	ENSMUSG00000020566	Atp6v1c2	0.455094218	0.494193674	no
chr12	24830661	24832354	ENSMUSG00000020646	Mboat2	0.839471936	0.623121007	yes
chr12	30911046	30912422	ENSMUSG00000044573, ENSMUSG00000020669	Acp1, Sh3yl1	0.184393189	0.124008814	no
chr12	33957002	33958861	ENSMUSG00000035799	Twist1	0.643492502	0.456920063	yes
chr12	40133033	40135066	ENSMUSG00000002565	Scin	0.533257704	0.263530707	yes
chr12	54997100	54997533	ENSMUSG00000035021	Baz1a	-0.452459451	-0.231773753	yes
chr12	57545103	57547342	ENSMUSG00000035451	Foxa1	0.693332928	0.40999418	yes
chr12	71830375	71832204	ENSMUSG00000034574	Daam1	0.390442511	0.296825791	yes
chr12	72441810	72442573	ENSMUSG00000021090	Lrrc9	0.840755628	0.806148406	yes
chr12	72664150	72665430	ENSMUSG00000021094	Dhrs7	0.342483491	0.172476265	yes
chr12	73111418	73113800	ENSMUSG00000034460	Six4	0.400967084	0.22883945	no
chr12	76709278	76711128	ENSMUSG00000021061	Sptb	0.293362685	0.156879313	yes
chr12	79130358	79131788	ENSMUSG00000021125	Arg2	0.338969645	0.259213484	yes
chr12	83762665	83764468	ENSMUSG00000021223	Papln	0.386037734	0.236821897	yes
chr12	84100470	84101691	ENSMUSG00000043487	Acot6	0.305239383	0.162500649	no
chr12	85745692	85746795	ENSMUSG00000034258	Mfsd7c	0.664949493	0.238397859	no
chr12	90737826	90739153	ENSMUSG00000007682	Dio2	0.549656657	0.32528132	yes
chr12	91400112	91401159	ENSMUSG00000020963	Tshr	0.520884807	0.474956586	yes
chr12	99411953	99412371	ENSMUSG00000033713	Foxn3	-0.752045731	-0.514625333	no
chr12	103531677	103533275	ENSMUSG00000021209	Ppp4r4	0.481116573	0.286594759	yes
chr12	108274667	108276174	ENSMUSG00000084883	Ccdc85c	0.259652603	0.161322006	yes
chr12	108332968	108334801	ENSMUSG00000021259	Cyp46a1	0.47695866	0.371793331	yes
chr12	119237721	119239222	ENSMUSG00000025321	Itgb8	1.050.999.262	0.221586699	yes
chr13	4608597	4609517	ENSMUSG00000045410	Akr1e1	0.576577764	0.625110092	yes
chr13	9276270	9277733	ENSMUSG00000048264	Dip2c	0.922714816	0.592578381	yes
chr13	13783534	13785885	ENSMUSG00000021303	Gng4	0.427976667	0.301571444	yes
chr13	16011511	16012974	ENSMUSG00000041324	Inhba	0.798422017	0.452052176	yes
chr13	23488442	23489332	ENSMUSG00000053216	Btn2a2	0.276602566	0.161550028	no
chr13	31558988	31560164	ENSMUSG00000038415, ENSMUSG00000090863	Foxq1, A530084C06Rik	0.623493852	0.478132261	yes
chr13	31625569	31627044	ENSMUSG00000038402	Foxf2	0.568796785	0.28300548	no
chr13	34343915	34345769	ENSMUSG00000038267	Slc22a23	0.532326331	0.548690514	yes
chr13	38150922	38152976	ENSMUSG00000054889	Dsp	0.449480847	0.215815628	yes
chr13	46501744	46502887	ENSMUSG00000021373	Cap2	0.514520116	0.482095419	yes
chr13	46929081	46931018	ENSMUSG00000021375	Kif13a	0.615578588	0.51095441	yes
chr13	54702111	54703161	ENSMUSG00000034918	Cdhr2	-0.405395126	-0.184197991	yes
chr13	55152504	55153220	ENSMUSG00000005320	Fgfr4	0.602290946	0.305874016	no
chr13	64273610	64276018	ENSMUSG00000033102	Cdc14b	0.249493482	0.271970605	no
chr13	74008812	74010407	ENSMUSG00000021573	Tppp	0.358882187	0.234707999	yes
chr13	76384099	76385308	ENSMUSG00000021596	Mctp1	0.50300694	0.602502579	yes
chr13	76579315	76579966	ENSMUSG00000021596	Mctp1	0.79966874	0.274013912	no
chr13	78198068	78199639	ENSMUSG00000069171	Nr2f1	0.666955417	0.479178835	yes
chr13	78201353	78202160	ENSMUSG00000069171	Nr2f1	0.667236345	0.362361317	yes
chr13	88821019	88823416	ENSMUSG00000034488	Edil3	1.020.975.857	0.386432661	yes
chr13	89739048	89741557	ENSMUSG00000021614	Vcan	0.65690318	0.316658202	yes
chr13	93143992	93145266	ENSMUSG00000047419	Cmya5	0.274202225	0.179274421	no
chr13	94057516	94058578	ENSMUSG00000045312	Lhfpl2	0.563528747	0.305978764	yes
chr13	94173701	94174354	ENSMUSG00000045312	Lhfpl2	0.870171091	0.567822031	yes
chr13	95617721	95618981	ENSMUSG00000048376	F2r	0.410470351	0.221830519	yes
chr13	98205835	98206722	ENSMUSG00000021662	Arhgef28	0.667876439	0.289511238	no
chr13	100015137	100016216	ENSMUSG00000021646	Mccc2	0.228680789	0.088550584	no
chr13	103096220	103097236	ENSMUSG00000034751	Mast4	1.076.644.372	0.238281163	no
chr13	104863204	104864183	ENSMUSG00000042655	Fam159b	0.68734147	0.523861531	yes
chr13	105053667	105055333	ENSMUSG00000021719	Rgs7bp	0.374956114	0.150736458	no
chr13	108213958	108215506	ENSMUSG00000021696	Elovl7	0.372381844	0.127763144	yes
chr13	109260260	109262447	ENSMUSG00000021699	Pde4d	0.503819088	0.168445935	no
chr13	109685519	109686100	ENSMUSG00000021699	Pde4d	0.689657594	0.408764699	yes
chr13	109902332	109904152	ENSMUSG00000021699	Pde4d	0.310874973	0.095488467	no
chr14	6108378	6108910	ENSMUSG00000094634	Gm3468	0.755961733	0.398322739	yes
chr14	7314750	7315495	ENSMUSG00000091472	Gm3739	1.113.167.935	0.566942402	yes
chr14	11160671	11162566	ENSMUSG00000060579	Fhit	0.706717348	0.392050266	yes
chr14	17659115	17661415	ENSMUSG00000021779	Thrb	0.596583427	0.251132733	yes
chr14	18893428	18894399	ENSMUSG00000058317	Ube2e2	0.807921491	0.626678463	yes
chr14	19584089	19585908	ENSMUSG00000093979	Gm2237	0.504825676	0.244323996	yes
chr14	20180547	20182172	ENSMUSG00000023243	Kcnk5	-0.33384676	-0.171280781	yes
chr14	20451440	20452320	ENSMUSG00000039543	Cfap70	0.614648645	0.564232577	yes
chr14	21986885	21988926	ENSMUSG00000039081	Zfp503	1.165.208.236	0.807542457	yes
chr14	22019417	22021154	ENSMUSG00000063458	1700112E06Rik	0.980551812	0.421255425	yes
chr14	31217462	31218062	ENSMUSG00000021904	Sema3g	-0.476731356	-0.17568687	no
chr14	47373486	47375008	ENSMUSG00000050335	Lgals3	0.526826707	0.29533931	yes
chr14	51912735	51914372	ENSMUSG00000004558	Ndrg2	0.513421347	0.283929435	yes
chr14	51984063	51986171	ENSMUSG00000004562	Arhgef40	0.376141054	0.229518619	yes
chr14	54410061	54410757	ENSMUSG00000000958	Slc7a7	-0.454172757	-0.525487498	no
chr14	55767506	55768510	ENSMUSG00000046908	Ltb4r1	0.427669655	0.326253925	yes
chr14	66123928	66125047	ENSMUSG00000022040	Ephx2	0.498304858	0.146946063	no
chr14	67932668	67934321	ENSMUSG00000044447	Dock5	0.503849247	0.74299926	yes
chr14	70519618	70521121	ENSMUSG00000022098	Bmp1	0.313609465	0.16057694	yes
chr14	70635475	70636670	ENSMUSG00000022099	Dmtn	0.426172866	0.34253677	yes
chr14	76413893	76416161	ENSMUSG00000022010	Tsc22d1	0.810738021	0.545941817	yes
chr14	78306624	78308227	ENSMUSG00000022015	Tnfsf11	0.290009481	0.184887182	yes
chr14	84442641	84443762	ENSMUSG00000035566	Pcdh17	0.847011785	0.343574212	yes
chr14	87140421	87141721	ENSMUSG00000022021	Diap3	0.308295895	0.155052474	yes
chr14	99298253	99299461	ENSMUSG00000005148	Klf5	0.96758916	0.572310734	yes
chr14	101607746	101609386	ENSMUSG00000033083	Tbc1d4	0.385916498	0.260880761	yes
chr14	101729146	101730651	ENSMUSG00000053821, ENSMUSG00000033060	Gm9922, Lmo7	0.303255421	0.222755503	yes
chr14	105896925	105898020	ENSMUSG00000022114	Spry2	0.371036029	0.199178017	yes
chr14	105898276	105899265	ENSMUSG00000022114	Spry2	0.308258346	0.1441163	no
chr14	115091774	115093018	ENSMUSG00000022112	Gpc5	0.338955237	0.222499924	yes
chr14	118922542	118923309	ENSMUSG00000042156	Dzip1	0.313601549	0.241687558	no
chr14	121035002	121036834	ENSMUSG00000025555	Farp1	0.767633737	0.434326513	yes
chr15	12548864	12550407	ENSMUSG00000022197	Pdzd2	0.433896431	0.387647247	no
chr15	25412225	25415036	ENSMUSG00000045763, ENSMUSG00000056089	Basp1, Gm5468	0.389184114	0.158045899	yes
chr15	34237363	34239051	ENSMUSG00000022257	Laptm4b	0.376035381	0.247290394	yes
chr15	37791231	37792600	ENSMUSG00000051359	Ncald	0.573003796	0.490324648	yes
chr15	39005794	39007030	ENSMUSG00000022297	Fzd6	0.800807471	0.650751705	yes
chr15	39942904	39944504	ENSMUSG00000022305	Lrp12	0.402708608	0.426960795	yes
chr15	41446953	41448090	ENSMUSG00000022307	Oxr1	0.526294826	0.470912055	yes
chr15	42674753	42677162	ENSMUSG00000022309	Angpt1	0.42908962	0.152632492	no
chr15	66968382	66970396	ENSMUSG00000005125	Ndrg1	0.389842504	0.135531976	yes
chr15	68927801	68929387	ENSMUSG00000022332	Khdrbs3	1.053.949.953	0.759562246	yes
chr15	75981329	75982423	ENSMUSG00000098176	Ccdc166	0.445039735	0.253941877	yes
chr15	76616209	76618056	ENSMUSG00000063354	Slc39a4	-0.4042095	-0.235936961	yes
chr15	78926016	78926771	ENSMUSG00000068220	Lgals1	-0.399566156	-0.183623455	yes
chr15	83526191	83527572	ENSMUSG00000016758	Bik	0.482373684	0.180575165	yes
chr15	84231193	84232452	ENSMUSG00000022438	Parvb	0.602272999	0.423647816	yes
chr15	89591342	89592381	ENSMUSG00000022621	Rabl2	0.466303576	0.454495273	yes
chr15	93595039	93596657	ENSMUSG00000036158	Prickle1	1.076.767.847	0.593885044	yes
chr15	98003277	98004756	ENSMUSG00000022483	Col2a1	0.516606858	0.484744397	yes
chr15	98108081	98109215	ENSMUSG00000033065	Pfkm	0.404420411	0.30359311	yes
chr15	98167405	98168702	ENSMUSG00000048175, ENSMUSG00000029875	Asb8, Ccdc184	0.432209308	0.173215255	no
chr15	98608659	98610458	ENSMUSG00000022994	Adcy6	0.430227629	0.20489165	yes
chr15	98729842	98731513	ENSMUSG00000003355	Fkbp11	-0.340744333	-0.255310317	yes
chr15	98832671	98832992	ENSMUSG00000067713	Prkag1	-0.379196692	-0.474519412	no
chr15	103502468	103503775	ENSMUSG00000022489	Pde1b	0.265060839	0.231982398	no
chr16	4639782	4641601	ENSMUSG00000039646	Vasn	0.695676753	0.342035813	yes
chr16	15862090	15863735	ENSMUSG00000022671	Mzt2	0.204073289	0.105872611	no
chr16	16212735	16214451	ENSMUSG00000041957	Pkp2	0.441602678	0.4652998	yes
chr16	16828734	16829760	ENSMUSG00000022783	Spag6	0.540510326	0.246470075	yes
chr16	18347995	18348769	ENSMUSG00000000325	Arvcf	0.255598387	0.128734196	yes
chr16	21204368	21205210	ENSMUSG00000005958	Ephb3	0.86656627	0.732004206	yes
chr16	21946818	21948010	ENSMUSG00000022856	Tmem41a	0.307437361	0.238505429	yes
chr16	26581024	26582269	ENSMUSG00000022514	Il1rap	0.198006633	0.174087175	yes
chr16	31428467	31430347	ENSMUSG00000046598	Bdh1	0.198359433	0.137556023	no
chr16	31935035	31935887	ENSMUSG00000045625	Pigz	0.327067626	0.299970627	no
chr16	38742059	38743351	ENSMUSG00000022793	B4galt4	0.302333962	0.148456856	no
chr16	38901877	38902770	ENSMUSG00000022790	Igsf11	0.370592915	0.210137275	yes
chr16	46496267	46498588	ENSMUSG00000022656	Pvrl3	0.686193303	0.596158786	yes
chr16	58407966	58409321	ENSMUSG00000035107	Dcbld2	0.311758005	0.189175931	yes
chr16	62852811	62854831	ENSMUSG00000022912	Pros1	0.369225477	0.302974292	yes
chr16	75592671	75594172	ENSMUSG00000032940	Rbm11	0.555080366	0.370070502	yes
chr16	78301224	78302574	ENSMUSG00000022865	Cxadr	0.662153725	0.587356175	yes
chr16	84773559	84775199	ENSMUSG00000053062	Jam2	0.457662883	0.195511336	yes
chr16	90829830	90831652	ENSMUSG00000039903	Eva1c	0.439362302	0.466821225	no
chr16	97762819	97764056	ENSMUSG00000005251	Ripk4	0.608952345	0.342610483	yes
chr17	8800247	8802399	ENSMUSG00000023868	Pde10a	0.709288462	0.557742188	yes
chr17	10839830	10841308	ENSMUSG00000037196, ENSMUSG00000023826	Pacrg, Park2	0.535023798	0.470469326	yes
chr17	21908774	21910217	ENSMUSG00000078546	2210404O09Rik	0.350189588	0.326202967	yes
chr17	22738563	22740362	ENSMUSG00000098164	Gm5493	0.302743025	0.327428291	no
chr17	24205046	24207289	ENSMUSG00000036473	Tbc1d24	0.171762531	0.113700804	no
chr17	24649545	24650689	ENSMUSG00000002504	Slc9a3r2	0.395922602	0.412669303	yes
chr17	28349966	28351859	ENSMUSG00000002249	Tead3	0.36826906	0.127930118	no
chr17	33555234	33556165	ENSMUSG00000024300	Myo1f	-0.34904028	-0.25234622	no
chr17	37045434	37047174	ENSMUSG00000024462	Gabbr1	0.242021009	0.146165567	no
chr17	37049856	37050367	ENSMUSG00000024462	Gabbr1	0.386025997	0.297576896	yes
chr17	40879978	40880858	ENSMUSG00000054951	9130008F23Rik	0.715005784	0.233033774	no
chr17	43016208	43017872	ENSMUSG00000023915	Tnfrsf21	0.254655428	0.184059217	yes
chr17	43952341	43953318	ENSMUSG00000039601	Rcan2	0.71686271	0.429319011	yes
chr17	44078579	44079251	ENSMUSG00000023960	Enpp5	0.586072894	0.494774532	yes
chr17	44105228	44106212	ENSMUSG00000023961	Enpp4	0.60419826	0.662379504	yes
chr17	44737889	44738393	ENSMUSG00000039153	Runx2	0.552394501	0.253922735	no
chr17	46154351	46154605	ENSMUSG00000034509	Mad2l1bp	-0.567100679	-0.489416989	yes
chr17	48462023	48462616	ENSMUSG00000043592	Unc5cl	-0.545037525	-0.288646084	yes
chr17	52601983	52602924	ENSMUSG00000035580	Kcnh8	0.870612229	0.313521602	no
chr17	55952173	55953357	ENSMUSG00000003206	Ebi3	-0.32777974	-0.289693622	yes
chr17	62879965	62882603	ENSMUSG00000048915	Efna5	0.519214949	0.345419026	yes
chr17	62882789	62884576	ENSMUSG00000048915	Efna5	0.495575907	0.242111802	yes
chr17	63863104	63864654	ENSMUSG00000045506	A930002H24Rik	0.370987754	0.1907308	yes
chr17	66448346	66450461	ENSMUSG00000052105	Mtcl1	0.561802104	0.390527794	yes
chr17	71310045	71312187	ENSMUSG00000024053	Emilin2	0.310790582	0.15566865	yes
chr17	75177902	75178575	ENSMUSG00000001870	Ltbp1	0.799427846	0.852002879	yes
chr17	79052061	79052830	ENSMUSG00000024084	Qpct	0.384924087	0.166272611	no
chr17	79715483	79716132	ENSMUSG00000024087	Cyp1b1	0.653377139	0.340167858	yes
chr17	80061136	80063145	ENSMUSG00000024095	Hnrnpll	0.207906555	0.20204891	no
chr17	80127249	80128174	ENSMUSG00000035473	Galm	0.4893317	0.526629226	yes
chr17	83214176	83216061	ENSMUSG00000024247	Pkdcc	0.519638596	0.214055726	yes
chr17	88667520	88669002	ENSMUSG00000024154	Gtf2a1l	0.523664808	0.224169883	yes
chr17	90088125	90088787	ENSMUSG00000024109	Nrxn1	1.504.585.715	0.410300988	yes
chr17	90454212	90456606	ENSMUSG00000024109	Nrxn1	1.131.312.989	0.235847091	yes
chr18	4634564	4635943	ENSMUSG00000033960	9430020K01Rik	0.432998944	0.188477097	yes
chr18	11838995	11840868	ENSMUSG00000040957	Cables1	0.214191079	0.114538442	no
chr18	13969894	13971625	ENSMUSG00000024420	Zfp521	0.459244763	0.365428712	yes
chr18	13972271	13972968	ENSMUSG00000024420	Zfp521	0.464338607	0.387105384	yes
chr18	21299608	21300951	ENSMUSG00000042680	Garem	106.294.648	1.156.133.305	yes
chr18	23751892	23754760	ENSMUSG00000024277	Mapre2	0.287397664	0.1402294	yes
chr18	24652991	24654626	ENSMUSG00000039616	Mocos	0.311689012	0.159567857	no
chr18	24708472	24710208	ENSMUSG00000054745, ENSMUSG00000034295	Gm9955, Fhod3	0.885081789	0.412903229	yes
chr18	36348219	36349361	ENSMUSG00000046727	Cystm1	0.281090095	0.122130352	no
chr18	36515220	36516418	ENSMUSG00000024486	Hbegf	0.224743783	0.09456633	no
chr18	37661615	37661910	ENSMUSG00000103144	Pcdhga1	0.85736397	0.53090625	yes
chr18	37714690	37715221	ENSMUSG00000103472	Pcdhga7	0.765479768	0.370755339	yes
chr18	38600559	38602180	ENSMUSG00000024427	Spry4	0.430486156	0.124688961	yes
chr18	41950652	41951686	ENSMUSG00000056671	Prelid2	0.756622209	0.43874631	yes
chr18	57877910	57879626	ENSMUSG00000024597	Slc12a2	0.247443895	0.167212216	yes
chr18	61535598	61537094	ENSMUSG00000045094	Arhgef37	0.451097082	0.287650006	yes
chr18	68336974	68338623	ENSMUSG00000007480	Mc5r	0.352104674	0.298969476	yes
chr18	75695288	75697756	ENSMUSG00000052928	Ctif	0.6562059	0.761151931	yes
chr19	4614891	4616281	ENSMUSG00000045045	Lrfn4	0.340673533	0.290910008	yes
chr19	4838925	4839992	ENSMUSG00000034108, ENSMUSG00000067872	Ccs, Ccdc87	0.193179583	0.106932146	no
chr19	5987734	5989503	ENSMUSG00000037451	Slc22a20	-0.502908763	-0.206752524	yes
chr19	6070852	6071526	ENSMUSG00000024797	Vps51	-0.663141487	-0.532617218	yes
chr19	10182350	10183899	ENSMUSG00000010663	Fads1	0.292469695	0.206823058	yes
chr19	10914094	10915337	ENSMUSG00000024734	Zp1	-0.344207395	-0.270157347	yes
chr19	23758047	23759827	ENSMUSG00000024897	Apba1	0.304521607	0.168942266	yes
chr19	24899391	24900803	ENSMUSG00000051490	Foxd4	0.529800221	0.420162292	yes
chr19	28677432	28680261	ENSMUSG00000052942	Glis3	0.651699184	0.536869125	yes
chr19	34629521	34630178	ENSMUSG00000067297	2010002M12Rik	-0.652077941	-0.597721164	yes
chr19	43912639	43913699	ENSMUSG00000025195	Dnmbp	-0.298639549	-0.125931944	no
chr19	45811910	45812763	ENSMUSG00000025221	Kcnip2	0.303533632	0.154806513	no
chr19	47538778	47539342	ENSMUSG00000042694	Obfc1	-0.465540706	-0.267950825	yes
chr19	53893308	53894389	ENSMUSG00000024975	Pdcd4	-0.380613321	-0.24156321	yes
chr2	10372103	10373402	ENSMUSG00000061186	Sfmbt2	0.381774782	0.405866502	no
chr2	12301439	12302449	ENSMUSG00000026768	Itga8	0.353487609	0.326825382	yes
chr2	12923724	12924691	ENSMUSG00000026730	Pter	0.799743425	0.660804695	yes
chr2	13010122	13011735	ENSMUSG00000049630	C1ql3	0.565588223	0.295267671	yes
chr2	14054811	14056522	ENSMUSG00000063275	Ptpla	0.271388685	0.263800128	yes
chr2	16355666	16357134	ENSMUSG00000026748	Plxdc2	0.578431264	0.482071913	yes
chr2	17390598	17391665	ENSMUSG00000053702	Nebl	-0.399533254	-0.291446758	yes
chr2	27676399	27678033	ENSMUSG00000015846	Rxra	0.502550606	0.614996816	yes
chr2	29251134	29253952	ENSMUSG00000035513	Ntng2	0.317531572	0.304197277	yes
chr2	32893814	32894935	ENSMUSG00000026796	Fam129b	-0.380470187	-0.208873531	yes
chr2	32896419	32896848	ENSMUSG00000026796	Fam129b	-0.952232448	-0.479778239	yes
chr2	38354452	38355302	ENSMUSG00000000247	Lhx2	0.419574805	0.266920334	no
chr2	49619008	49620366	ENSMUSG00000026764	Kif5c	0.531437732	0.270578249	yes
chr2	51146938	51149366	ENSMUSG00000017144	Rnd3	0.528333468	0.176297804	no
chr2	57114196	57117825	ENSMUSG00000026826	Nr4a2	0.404282412	0.300951739	yes
chr2	57123146	57124701	ENSMUSG00000026826	Nr4a2	0.396912526	0.268344	yes
chr2	58324231	58325046	ENSMUSG00000026834	Acvr1c	0.540284888	0.217779684	yes
chr2	58357050	58358403	ENSMUSG00000026834	Acvr1c	0.911795211	0.354530154	yes
chr2	58566444	58568053	ENSMUSG00000026836, ENSMUSG00000026839	Acvr1, Upp2	0.552863764	0.590179367	yes
chr2	59160259	59162058	ENSMUSG00000036641, ENSMUSG00000026991	Ccdc148, Pkp4	0.413526801	0.247737981	yes
chr2	60962094	60963352	ENSMUSG00000026970	Rbms1	0.606249027	0.610089992	yes
chr2	62663915	62664776	ENSMUSG00000026893	Gca	0.290361313	0.176412562	yes
chr2	65022014	65023265	ENSMUSG00000026888	Grb14	0.742049061	0.372483048	yes
chr2	66124003	66125425	ENSMUSG00000026994	Galnt3	0.543567125	0.535694998	yes
chr2	68470860	68472621	ENSMUSG00000027030	Stk39	0.86225617	0.418275326	yes
chr2	71117484	71118707	ENSMUSG00000027015	Cybrd1	0.418801449	0.352306976	yes
chr2	74657452	74658202	ENSMUSG00000001815	Evx2	0.413777541	0.205263535	no
chr2	76406022	76407545	ENSMUSG00000042359	Osbpl6	0.535171058	0.459253785	yes
chr2	77169959	77170861	ENSMUSG00000044033	Ccdc141	0.593885806	0.39289471	yes
chr2	77280011	77281513	ENSMUSG00000042272	Sestd1	0.838867373	0.750949074	yes
chr2	83812336	83813660	ENSMUSG00000048388	Fam171b	0.447315431	0.184321245	no
chr2	84476102	84476828	ENSMUSG00000027082	Tfpi	0.66090051	0.419486991	yes
chr2	90782305	90783623	ENSMUSG00000040812	Agbl2	0.412540925	0.406365023	no
chr2	91457319	91458936	ENSMUSG00000027253	Lrp4	0.454439938	0.275383643	no
chr2	93333492	93334916	ENSMUSG00000027217	Tspan18	0.456554358	0.514529987	yes
chr2	104742352	104743361	ENSMUSG00000027173	Depdc7	0.359421526	0.390550138	no
chr2	105398460	105399816	ENSMUSG00000005973	Rcn1	0.364411918	0.242986279	yes
chr2	105669505	105670320	ENSMUSG00000027168	Pax6	0.981582978	0.779127975	yes
chr2	109917207	109918512	ENSMUSG00000050199	Lgr4	0.564342908	0.349792725	yes
chr2	118111021	118112246	ENSMUSG00000040152	Thbs1	0.463988093	0.392966972	yes
chr2	121806305	121807704	ENSMUSG00000027238	Frmd5	0.590115049	0.387578082	yes
chr2	129372964	129373954	ENSMUSG00000027398	Il1b	-0.345011565	-0.231430121	no
chr2	130634670	130636333	ENSMUSG00000037703	Lzts3	0.224690241	0.192204496	yes
chr2	131491496	131492741	ENSMUSG00000027333	Smox	0.415484539	0.430460568	yes
chr2	134643483	134644484	ENSMUSG00000034723	Tmx4	0.224298889	0.107527488	yes
chr2	135658431	135660102	ENSMUSG00000039943	Plcb4	0.454721278	0.606316709	yes
chr2	137114348	137115049	ENSMUSG00000027276	Jag1	0.748667403	0.486693403	yes
chr2	137116711	137117619	ENSMUSG00000027276	Jag1	0.635922972	0.700185554	yes
chr2	140395017	140396210	ENSMUSG00000068205	Macrod2	0.909619715	0.803350617	yes
chr2	144330277	144332221	ENSMUSG00000037279	Ovol2	0.431502269	0.357577266	yes
chr2	151008384	151009972	ENSMUSG00000068115	Ninl	0.481396806	0.250786348	yes
chr2	152000811	152001051	ENSMUSG00000027463	Slc52a3	0.702768244	0.379458399	no
chr2	152105076	152105989	ENSMUSG00000032802	Srxn1	0.670497079	0.74709294	yes
chr2	165653097	165655640	ENSMUSG00000017897	Eya2	-0.314362335	-0.234326724	yes
chr2	175141645	175142590	ENSMUSG00000090093	Gm14399	0.321213875	0.195007719	no
chr2	176486329	176487308	ENSMUSG00000078881	Gm14434	0.305153607	0.159283849	no
chr2	177205865	177206999	ENSMUSG00000078870	Gm14410	0.450722493	0.146933496	no
chr2	178077896	178079054	ENSMUSG00000078861	Zfp931	0.282926159	0.229144123	yes
chr2	180225242	180226260	ENSMUSG00000015647	Lama5	0.614587177	0.31297868	no
chr2	180227400	180228166	ENSMUSG00000015647	Lama5	0.534758698	0.213404274	no
chr2	181188454	181189144	ENSMUSG00000016344	Ppdpf	-0.399319087	-0.299573176	yes
chr3	7501713	7502211	ENSMUSG00000043542	Zc2hc1a	0.605870115	0.710814707	no
chr3	7502743	7504039	ENSMUSG00000043542	Zc2hc1a	0.376694135	0.496929435	yes
chr3	10087117	10088307	ENSMUSG00000049230	Gm9833	0.597833032	0.139859969	no
chr3	27983894	27984510	ENSMUSG00000027695	Pld1	0.785386968	1.005.481.408	yes
chr3	28262483	28264602	ENSMUSG00000027692	Tnik	0.491182301	0.219817027	yes
chr3	30507039	30507748	ENSMUSG00000027684	Mecom	0.670202012	0.424661699	no
chr3	30508012	30508995	ENSMUSG00000027684	Mecom	0.872628	0.524134096	yes
chr3	36612842	36613938	ENSMUSG00000037325	Bbs7	0.446010899	0.331694833	yes
chr3	37348157	37349062	ENSMUSG00000037225	Fgf2	0.584931296	0.419041538	yes
chr3	40530864	40532073	ENSMUSG00000060798	Intu	0.661705586	0.276647923	yes
chr3	40540498	40541402	ENSMUSG00000060798	Intu	0.317803653	0.227992971	no
chr3	51660232	51663720	ENSMUSG00000074604	Mgst2	-0.239176883	-0.164049262	no
chr3	57846968	57848316	ENSMUSG00000027805	Pfn2	0.211785743	0.164571472	no
chr3	58636225	58637387	ENSMUSG00000070471	Erich6	0.333195658	0.156629021	no
chr3	59005613	59007492	ENSMUSG00000056476	Med12l	0.883974122	0.32441631	yes
chr3	61002276	61003530	ENSMUSG00000027765	P2ry1	0.761859165	0.790849503	yes
chr3	67373792	67374474	ENSMUSG00000048416, ENSMUSG00000090408	Mlf1, Gm17402	0.729214613	0.412715008	yes
chr3	68869231	68870799	ENSMUSG00000046999, ENSMUSG00000091272	1110032F04Rik, Gm17641	0.320400306	0.240403881	yes
chr3	69223435	69224306	ENSMUSG00000098207	Arl14	-0.412966181	-0.250193701	no
chr3	75955996	75957474	ENSMUSG00000034109	Golim4	0.521451133	0.215530842	yes
chr3	84479275	84481078	ENSMUSG00000041842	Fhdc1	0.422874958	0.469128985	yes
chr3	85886754	85888766	ENSMUSG00000102805, ENSMUSG00000031286	RP24-559D1.1, Glt28d2	0.256013593	0.319070891	yes
chr3	87768479	87769357	ENSMUSG00000028073	Pear1	-0.270492892	-0.186196212	yes
chr3	89337239	89338245	ENSMUSG00000028040	Efna4	0.315261334	0.177182091	yes
chr3	89390319	89391027	ENSMUSG00000028042	Zbtb7b	-0.351626947	-0.28857174	yes
chr3	94412630	94413574	ENSMUSG00000041912	Tdrkh	0.302749886	0.183257278	yes
chr3	97867428	97868864	ENSMUSG00000038170	Pde4dip	0.417751798	0.30398186	yes
chr3	100488198	100490064	ENSMUSG00000044468	Fam46c	0.215804798	0.218609947	yes
chr3	101923363	101924879	ENSMUSG00000033147	Slc22a15	0.334563057	0.468612486	yes
chr3	103101984	103103384	ENSMUSG00000007379	Dennd2c	0.20350934	0.106414137	no
chr3	106684481	106685519	ENSMUSG00000056260	Lrif1	0.416140157	0.289813622	yes
chr3	108880139	108881402	ENSMUSG00000045326	Fndc7	-0.239487714	-0.194959234	no
chr3	108883563	108884192	ENSMUSG00000045326	Fndc7	-0.540014761	-0.230812287	yes
chr3	108888884	108889650	ENSMUSG00000045326	Fndc7	-0.425410038	-0.29946635	yes
chr3	109122617	109124311	ENSMUSG00000040322	Slc25a24	0.336308147	0.159625705	yes
chr3	122618601	122620947	ENSMUSG00000039735	Fnbp1l	0.287488503	0.181470679	yes
chr3	122728727	122731020	ENSMUSG00000053965	Pde5a	0.528619775	0.235140197	yes
chr3	129213526	129214975	ENSMUSG00000028023	Pitx2	0.553715931	0.393465584	yes
chr3	129969040	129971134	ENSMUSG00000027994	Ccdc109b	0.559540328	0.475934866	yes
chr3	130180185	130181597	ENSMUSG00000058897	Col25a1	1.076.379.239	0.677167232	yes
chr3	131302605	131303675	ENSMUSG00000027983	Cyp2u1	0.20801477	0.118724545	yes
chr3	137623147	137624549	ENSMUSG00000046818	Ddit4l	0.689665326	0.496534715	yes
chr3	157924564	157925475	ENSMUSG00000028179	Cth	0.477918292	0.321497666	yes
chr4	11386605	11389554	ENSMUSG00000040728	Esrp1	0.329257862	0.125750394	no
chr4	12906743	12907497	ENSMUSG00000055963	Triqk	0.587148024	0.463817387	yes
chr4	22486877	22490744	ENSMUSG00000095139	Pou3f2	0.298354326	0.23994601	yes
chr4	24896783	24898695	ENSMUSG00000028261	Ndufaf4	0.251776029	0.147835415	yes
chr4	28812783	28813670	ENSMUSG00000028289	Epha7	1.208.876.392	0.72600214	yes
chr4	32982263	32984367	ENSMUSG00000028278	Rragd	0.264232024	0.161851827	yes
chr4	33188385	33189866	ENSMUSG00000054659	Pm20d2	0.588592628	0.310575278	yes
chr4	33209001	33209994	ENSMUSG00000054679	Srsf12	0.305342166	0.151564903	no
chr4	34729745	34730495	ENSMUSG00000028294	1700003M02Rik	0.457962702	0.642077385	no
chr4	41097028	41098753	ENSMUSG00000028435	Aqp3	0.334989554	0.173661848	no
chr4	41941543	41942650	ENSMUSG00000078747	Gm20878	0.555094637	0.672320555	yes
chr4	42293839	42294995	ENSMUSG00000094695	Gm21953	0.481996448	0.671905377	yes
chr4	43875006	43876455	ENSMUSG00000028476	Reck	0.315399274	0.201981293	yes
chr4	46411280	46412323	ENSMUSG00000028332	Hemgn	-0.368064403	-0.279019098	yes
chr4	53630904	53632133	ENSMUSG00000054752	Fsd1l	0.936194276	0.57019991	yes
chr4	57433935	57434796	ENSMUSG00000090053	Palm2	0.873991465	0.326762582	no
chr4	62517416	62518189	ENSMUSG00000028393	Alad	-0.537265558	-0.197909386	no
chr4	63359904	63361129	ENSMUSG00000061540	Orm2	-0.390099795	-0.201428696	no
chr4	65604493	65605696	ENSMUSG00000051675	Trim32	0.280027603	0.204320441	no
chr4	70409725	70411016	ENSMUSG00000039298	Cdk5rap2	0.209805987	0.101297936	no
chr4	93334503	93336031	ENSMUSG00000054000	Tusc1	0.595951325	0.319362358	yes
chr4	96591295	96592012	ENSMUSG00000015224	Cyp2j9	0.830232893	0.322805682	no
chr4	99032931	99033729	ENSMUSG00000028553	Angptl3	0.71180831	0.385433026	yes
chr4	99120314	99121337	ENSMUSG00000028556	Dock7	0.869146455	1.061.022.039	yes
chr4	99656179	99658092	ENSMUSG00000067261	Foxd3	0.605042659	0.454206348	no
chr4	101419118	101420689	ENSMUSG00000028527	Ak4	0.502056279	0.322763274	no
chr4	105109237	105110559	ENSMUSG00000028518	Prkaa2	0.328249299	0.189938044	yes
chr4	108878801	108879973	ENSMUSG00000003411	Rab3b	0.352608298	0.251884623	no
chr4	117835079	117836933	ENSMUSG00000028542	Slc6a9	0.208805214	0.304809415	yes
chr4	119415008	119415902	ENSMUSG00000028637	Ccdc30	0.428027622	0.230698222	yes
chr4	123182855	123183919	ENSMUSG00000046093	Hpcal4	0.449800459	0.361230607	no
chr4	126162354	126163580	ENSMUSG00000073758	Sh3d21	0.245735088	0.150160132	yes
chr4	126734556	126736396	ENSMUSG00000042477	Tfap2e	0.360406103	0.183133668	no
chr4	133177395	133178053	ENSMUSG00000028868	Wasf2	-0.644260423	-0.254905191	no
chr4	139197889	139198551	ENSMUSG00000028745	Capzb	-0.366962836	-0.331563918	yes
chr4	142083612	142084839	ENSMUSG00000040616	Tmem51	-0.889782314	-0.223220607	yes
chr4	150487983	150489165	ENSMUSG00000039852	Rere	-0.468154005	-0.20303961	yes
chr4	155360948	155362098	ENSMUSG00000029053	Prkcz	-0.703444892	-0.152962821	no
chr4	155468835	155469529	ENSMUSG00000023153	Tmem52	0.539589857	0.39973819	no
chr4	155652967	155655271	ENSMUSG00000029061	Mmp23	0.225897105	0.161168524	no
chr4	155783884	155784809	ENSMUSG00000073680	Tmem88b	0.236937063	0.116070129	no
chr5	5379602	5381095	ENSMUSG00000028926	Cdk14	0.531607693	0.190511705	yes
chr5	22343755	22345522	ENSMUSG00000042453	Reln	0.746427905	0.512934382	yes
chr5	24602029	24603166	ENSMUSG00000028949	Smarcd3	0.329766612	0.16859817	no
chr5	32239069	32239826	ENSMUSG00000029134	Plb1	-0.907067999	-0.488000913	yes
chr5	32745828	32746896	ENSMUSG00000023452	Pisd	-0.310770507	-0.140215633	no
chr5	33721264	33723430	ENSMUSG00000054252	Fgfr3	0.394521912	0.170866238	yes
chr5	33983152	33984148	ENSMUSG00000070858	Gm1673	0.46241938	0.429456605	yes
chr5	33995763	33997616	ENSMUSG00000048142	Nat8l	0.405780814	0.557665061	yes
chr5	36529780	36530715	ENSMUSG00000029192	Tbc1d14	0.426619447	0.338653041	yes
chr5	36574200	36574890	ENSMUSG00000029192	Tbc1d14	-0.704475431	-0.296423487	yes
chr5	38684144	38685186	ENSMUSG00000046572	Zfp518b	0.443141268	0.332856789	yes
chr5	51551830	51553218	ENSMUSG00000029167	Ppargc1a	0.470429417	0.301857449	yes
chr5	51553461	51554162	ENSMUSG00000029167	Ppargc1a	0.527378232	0.20010604	no
chr5	53809042	53810206	ENSMUSG00000039178	Tbc1d19	0.441115711	0.399797266	yes
chr5	63970413	63970662	ENSMUSG00000047881	Rell1	-0.327459911	-0.256971332	yes
chr5	72580259	72581196	ENSMUSG00000063935	Zar1	0.891188785	0.42887498	yes
chr5	72647265	72648352	ENSMUSG00000067219	Nipal1	0.213855604	0.10189056	no
chr5	73006798	73008697	ENSMUSG00000029219	Slc10a4	0.575760406	0.304451801	yes
chr5	74704079	74704729	ENSMUSG00000029228	Lnx1	0.825130064	0.39701092	yes
chr5	77015595	77016397	ENSMUSG00000029248	1700023E05Rik	0.451428712	0.44578045	yes
chr5	90930746	90931978	ENSMUSG00000029376	Mthfd2l	0.241629614	0.14334798	yes
chr5	92674895	92676088	ENSMUSG00000050050	Ccdc158	0.554897	0.294077366	yes
chr5	103424801	103425582	ENSMUSG00000034573	Ptpn13	0.675069272	0.429411527	yes
chr5	104859310	104860457	ENSMUSG00000072774	Zfp951	-0.399233931	-0.278729739	yes
chr5	107288290	107289799	ENSMUSG00000029287	Tgfbr3	0.248078166	0.200721639	yes
chr5	112254262	112255252	ENSMUSG00000066975, ENSMUSG00000029343	Cryba4, Crybb1	-0.467505177	-0.390897205	yes
chr5	129006363	129006537	ENSMUSG00000029428	Stx2	-1.174.071.764	-0.397304802	yes
chr5	134098643	134100159	ENSMUSG00000015944	Gatsl2	0.297379916	0.302694216	yes
chr5	138227063	138228713	ENSMUSG00000047592	Nxpe5	-0.382577977	-0.270787414	no
chr5	140733135	140734131	ENSMUSG00000050022	Amz1	-0.450242425	-0.155362337	no
chr5	142700948	142702904	ENSMUSG00000050822	Slc29a4	0.380757864	0.304726603	yes
chr5	149264773	149265484	ENSMUSG00000060063	Alox5ap	-0.455858357	-0.244880013	yes
chr5	150258349	150260214	ENSMUSG00000056602	Fry	0.372027558	0.224507408	yes
chr6	6216509	6217515	ENSMUSG00000015112	Slc25a13	0.663201576	0.645360023	yes
chr6	7692656	7693422	ENSMUSG00000029752	Asns	1.108.947.459	1.080.690.563	yes
chr6	7983080	7984047	ENSMUSG00000096403	Gm9825	0.650089003	0.319212384	no
chr6	8777468	8778581	ENSMUSG00000062995	Ica1	0.624613081	0.464169784	yes
chr6	17463476	17464078	ENSMUSG00000009376	Met	0.974000505	0.675733974	yes
chr6	17693680	17695137	ENSMUSG00000029534	St7	0.201170188	0.156375795	no
chr6	21984951	21986805	ENSMUSG00000062980	Cped1	0.351223681	0.171133325	yes
chr6	28134722	28136309	ENSMUSG00000024211	Grm8	0.56260338	0.224997248	no
chr6	28396737	28398682	ENSMUSG00000039841	Zfp800	0.51310854	0.298681638	yes
chr6	28831923	28833928	ENSMUSG00000049939	Lrrc4	0.262462947	0.224598069	no
chr6	29178310	29179739	ENSMUSG00000079654	Prrt4	0.641947712	0.333619634	yes
chr6	29396033	29397068	ENSMUSG00000029769	Ccdc136	0.36898278	0.386574814	no
chr6	29735200	29736611	ENSMUSG00000001761	Smo	0.550248458	0.472608148	yes
chr6	31563346	31564423	ENSMUSG00000025608	Podxl	0.608531727	0.596773464	yes
chr6	34040654	34041302	ENSMUSG00000056215	Lrguk	0.442091733	0.383740717	no
chr6	41604420	41605960	ENSMUSG00000029869	Ephb6	0.425509587	0.3067722	yes
chr6	50455224	50456414	ENSMUSG00000029822	Osbpl3	0.367929555	0.322242389	no
chr6	52157024	52159031	ENSMUSG00000029844	Hoxa1	0.478243051	0.222353787	yes
chr6	53067629	53069024	ENSMUSG00000063568	Jazf1	0.508729549	0.454890933	yes
chr6	54039372	54040902	ENSMUSG00000004633	Chn2	-0.436004305	-0.2489914	yes
chr6	57823126	57823757	ENSMUSG00000037788	Vopp1	0.655961879	0.657145528	yes
chr6	57824081	57825544	ENSMUSG00000037788	Vopp1	0.513496722	0.368078983	yes
chr6	58639950	58641015	ENSMUSG00000029802	Abcg2	0.718956185	0.294408743	yes
chr6	59023705	59024973	ENSMUSG00000037709	Fam13a	0.497416814	0.233633083	no
chr6	61179811	61181658	ENSMUSG00000039578	Ccser1	0.484445417	0.226689209	yes
chr6	67375818	67376572	ENSMUSG00000018341	Il12rb2	0.601708646	0.3698658	yes
chr6	71143730	71144451	ENSMUSG00000054474	Thnsl2	0.563077064	0.552124538	yes
chr6	84008339	84009344	ENSMUSG00000033788	Dysf	0.47399233	0.316743714	no
chr6	88193644	88194321	ENSMUSG00000015053	Gata2	0.684259957	0.412284143	no
chr6	89361268	89363237	ENSMUSG00000030084	Plxna1	0.251835971	0.258808921	no
chr6	90369105	90370622	ENSMUSG00000034430	Zxdc	0.254915366	0.199173018	yes
chr6	94699201	94701280	ENSMUSG00000030029	Lrig1	0.344613091	0.26137799	yes
chr6	97806474	97807813	ENSMUSG00000035158	Mitf	0.236924958	0.146044718	no
chr6	112273418	112274793	ENSMUSG00000057604	Lmcd1	0.633962969	0.27699507	yes
chr6	113720639	113721386	ENSMUSG00000064177	Ghrl	0.60149263	0.451605729	no
chr6	118065053	118067155	ENSMUSG00000030134	Rasgef1a	0.720381788	0.325410412	yes
chr6	118067772	118068147	ENSMUSG00000030134	Rasgef1a	0.699234383	0.542639986	yes
chr6	118454898	118455812	ENSMUSG00000030145	Zfp248	0.515240766	0.19883132	yes
chr6	125349141	125350748	ENSMUSG00000030341	Tnfrsf1a	0.294779694	0.4039736	no
chr6	128143007	128144323	ENSMUSG00000030352	Tspan9	0.556975527	0.482262532	yes
chr6	128200096	128201487	ENSMUSG00000056771	Gm10010	0.355255074	0.292445766	yes
chr6	129591444	129592198	ENSMUSG00000030165	Klrd1	0.368682074	0.20084563	no
chr6	134413808	134414925	ENSMUSG00000030200	Bcl2l14	0.456846261	0.34011052	yes
chr6	135197515	135198862	ENSMUSG00000030207	8430419L09Rik	0.432471846	0.349557693	yes
chr6	140423663	140425245	ENSMUSG00000030231	Plekha5	0.500748546	0.429154857	yes
chr6	145746044	145747710	ENSMUSG00000030259	Rassf8	0.30347084	0.192942072	yes
chr6	147475588	147476952	ENSMUSG00000030301	Ccdc91	0.399514403	0.314647424	yes
chr6	148442783	148444896	ENSMUSG00000030306	Tmtc1	0.620667277	0.611764015	yes
chr6	149408404	149410131	ENSMUSG00000003452	Bicd1	0.483957763	0.265832456	yes
chr7	4751831	4753501	ENSMUSG00000051811	Cox6b2	0.42173484	0.242057188	yes
chr7	4835928	4836939	ENSMUSG00000053550	Shisa7	0.417759342	0.295183011	yes
chr7	16174394	16176323	ENSMUSG00000041420	Meis3	0.283214203	0.164353887	no
chr7	16245725	16246445	ENSMUSG00000074361	C5ar2	-0.582164128	-0.27148433	no
chr7	17058094	17059793	ENSMUSG00000004328	Hif3a	-0.326416149	-0.284774014	yes
chr7	17062906	17063324	ENSMUSG00000004328	Hif3a	-0.651571991	-0.243032591	yes
chr7	19092740	19095431	ENSMUSG00000040841	Six5	0.262765938	0.095339165	yes
chr7	19700564	19701501	ENSMUSG00000002985, ENSMUSG00000002984	Apoe, Tomm40	-0.72018285	-0.159982907	yes
chr7	25119742	25121082	ENSMUSG00000008496	Pou2f2	-0.243592457	-0.20039832	yes
chr7	28787967	28789457	ENSMUSG00000051735	Rinl	-0.255481364	-0.164262684	yes
chr7	29124952	29125481	ENSMUSG00000030592	Ryr1	0.611405623	0.353057533	yes
chr7	29303524	29304326	ENSMUSG00000030584	Dpf1	0.461529742	0.282983422	yes
chr7	43352968	43353711	ENSMUSG00000039013	Siglecf	-0.351855512	-0.345323038	no
chr7	45090401	45092458	ENSMUSG00000019539	Rcn3	-0.535143473	-0.302026236	yes
chr7	45361027	45361980	ENSMUSG00000003863	Ppfia3	0.245731723	0.165120262	no
chr7	45643219	45644173	ENSMUSG00000042918	Mamstr	0.371679495	0.151389967	yes
chr7	52005231	52006595	ENSMUSG00000074093	Svip	0.407727291	0.312315856	yes
chr7	56018585	56019959	ENSMUSG00000047037	Nipa1	0.354691055	0.407762417	yes
chr7	66839296	66840855	ENSMUSG00000058145	Adamts17	0.5288557	0.304582538	yes
chr7	67950662	67952659	ENSMUSG00000005533	Igf1r	0.337997952	0.278189065	yes
chr7	67952927	67953907	ENSMUSG00000005533	Igf1r	0.373787673	0.242313762	yes
chr7	89403295	89405146	ENSMUSG00000049791	Fzd4	0.302221969	0.10635896	yes
chr7	90426007	90426954	ENSMUSG00000044362	Ccdc89	0.41038585	0.227610227	yes
chr7	97081122	97083087	ENSMUSG00000004508	Gab2	0.279066087	0.189318387	yes
chr7	98837640	98839346	ENSMUSG00000015957	Wnt11	0.413636315	0.20751111	yes
chr7	101011269	101012647	ENSMUSG00000032860	P2ry2	0.339751014	0.19197153	yes
chr7	104299878	104300296	ENSMUSG00000090215	Trim34b	-0.394761822	-0.191255058	no
chr7	105580736	105581952	ENSMUSG00000037032	Apbb1	0.200392553	0.118367544	no
chr7	116031357	116034722	ENSMUSG00000051910	Sox6	0.284624518	0.184412623	yes
chr7	116039166	116040773	ENSMUSG00000051910	Sox6	0.299223551	0.113873937	no
chr7	118491046	118492493	ENSMUSG00000095115	Itpripl2	0.527017998	0.217152528	yes
chr7	120102100	120103037	ENSMUSG00000030917	Tmem159	0.614417482	0.415310057	yes
chr7	128062257	128062939	ENSMUSG00000030786	Itgam	-0.533831527	-0.21075585	yes
chr7	133123964	133124614	ENSMUSG00000030849, ENSMUSG00000030970	Fgfr2, Ctbp2	0.803797227	0.573816543	yes
chr7	136894087	136895046	ENSMUSG00000054612	Mgmt	0.675245176	0.517978857	yes
chr7	139187811	139190159	ENSMUSG00000015981	Stk32c	0.328732007	0.210118801	no
chr7	140947055	140948356	ENSMUSG00000025489	Ifitm5	-0.435168889	-0.258130521	yes
chr7	140953720	140956049	ENSMUSG00000060591	Ifitm2	-0.33919928	-0.191135833	yes
chr7	141949188	141950864	ENSMUSG00000053046	Brsk2	0.524329385	0.371226939	yes
chr7	142094504	142095882	ENSMUSG00000037887	Dusp8	0.327421108	0.286417036	yes
chr8	3392687	3393405	ENSMUSG00000004568	Arhgef18	1.178.214.977	0.683677507	yes
chr8	3587212	3588491	ENSMUSG00000044433	Camsap3	0.360040297	0.385584051	no
chr8	12756559	12757749	ENSMUSG00000031441	Atp11a	0.611849346	0.608365301	yes
chr8	13889126	13890781	ENSMUSG00000031458	Coprs	0.257522784	0.220904087	yes
chr8	25087702	25091266	ENSMUSG00000031557	Plekha2	-0.33081602	-0.222901767	yes
chr8	33516706	33518219	ENSMUSG00000009628	Tex15	0.49679751	0.290764563	yes
chr8	33890720	33892448	ENSMUSG00000031586	Rbpms	-0.525204255	-0.209848595	yes
chr8	35825506	35827073	ENSMUSG00000055976	Cldn23	0.733636265	0.411384619	yes
chr8	36247910	36249862	ENSMUSG00000039633	Lonrf1	0.243937853	0.127658737	yes
chr8	46210387	46211589	ENSMUSG00000031633	Slc25a4	0.284124482	0.109398986	no
chr8	54076707	54078337	ENSMUSG00000031520	Vegfc	0.464920236	0.286516386	yes
chr8	60505660	60506421	ENSMUSG00000057228	Aadat	0.569481111	0.369440492	yes
chr8	60632302	60633309	ENSMUSG00000031647	Mfap3l	1.023.679.728	0.748676287	yes
chr8	70806474	70807038	ENSMUSG00000000791	Il12rb1	-0.316498605	-0.338372431	no
chr8	73352457	73354492	ENSMUSG00000004383	Large	0.555551791	0.377614599	yes
chr8	76898901	76900640	ENSMUSG00000031618	Nr3c2	1.038.880.351	0.590864809	yes
chr8	76901625	76902656	ENSMUSG00000031618	Nr3c2	1.333.395.283	0.44249755	yes
chr8	79027827	79031154	ENSMUSG00000071064	Zfp827	0.296696792	0.231479023	yes
chr8	79397900	79399938	ENSMUSG00000031681	Smad1	0.19033221	0.106377738	no
chr8	80492657	80494399	ENSMUSG00000051839	Gypa	0.549183427	0.462122756	yes
chr8	83667878	83669252	ENSMUSG00000019464	Ptger1	0.454510493	0.287169971	yes
chr8	84722706	84723898	ENSMUSG00000074203	G430095P16Rik	-0.384185468	-0.232138621	yes
chr8	88650195	88651609	ENSMUSG00000055994	Nod2	-0.370931316	-0.18026968	yes
chr8	92355595	92356648	ENSMUSG00000031737	Irx5	0.356506869	0.289192227	yes
chr8	95676840	95678768	ENSMUSG00000036564	Ndrg4	0.582689949	0.39794639	yes
chr8	95702367	95703725	ENSMUSG00000036564	Ndrg4	0.418748461	0.184840732	no
chr8	105471100	105471710	ENSMUSG00000014846	Tppp3	0.637372717	0.584140954	yes
chr8	107402814	107403985	ENSMUSG00000003849	Nqo1	0.452649676	0.243882529	yes
chr8	119436815	119438019	ENSMUSG00000074063	Osgin1	-0.48337158	-0.444300998	yes
chr8	120633837	120634864	ENSMUSG00000043687	1190005I06Rik	0.467459634	0.449766869	yes
chr9	8003095	8005165	ENSMUSG00000053110	Yap1	0.412947485	0.406943343	no
chr9	8042301	8043365	ENSMUSG00000053070	9230110C19Rik	0.583603119	0.197808915	yes
chr9	8133691	8134882	ENSMUSG00000040729	AK129341	0.963818877	0.605653983	yes
chr9	9238524	9239243	ENSMUSG00000050730	Arhgap42	1.194.236.962	0.424956929	yes
chr9	14751378	14752781	ENSMUSG00000049307	Fut4	0.398941651	0.168827109	no
chr9	15709055	15710485	ENSMUSG00000043885	Slc36a4	0.568465156	0.320277731	yes
chr9	21195886	21196770	ENSMUSG00000032177	Pde4a	-0.520269712	-0.48962461	yes
chr9	40191903	40193257	ENSMUSG00000025602	Zfp202	0.295575167	0.157277156	no
chr9	42944482	42945556	ENSMUSG00000032017	Grik4	0.44980952	0.219053218	yes
chr9	43105070	43106932	ENSMUSG00000059495	Arhgef12	0.360248675	0.476283365	yes
chr9	44419992	44420745	ENSMUSG00000043923	Ccdc84	-0.546746741	-0.336452008	yes
chr9	44798857	44800169	ENSMUSG00000002032	Tmem25	0.260108151	0.174951098	yes
chr9	49485815	49486229	ENSMUSG00000040219	Ttc12	0.877191173	0.711038018	no
chr9	50727573	50728483	ENSMUSG00000032064	Dixdc1	0.819195893	0.600682489	yes
chr9	50738914	50739894	ENSMUSG00000032064	Dixdc1	0.492036909	0.315322997	yes
chr9	51101502	51102345	ENSMUSG00000032057	4833427G06Rik	0.519615595	0.300603153	yes
chr9	51962778	51963861	ENSMUSG00000032051	Fdx1	0.329675635	0.363943567	yes
chr9	53383929	53384799	ENSMUSG00000034487	Kdelc2	0.906718446	0.665754114	yes
chr9	54699044	54700231	ENSMUSG00000032285	Dnaja4	0.719883971	0.679232734	yes
chr9	57467787	57468602	ENSMUSG00000040722	Scamp5	0.452076062	0.261044681	no
chr9	57819129	57819437	ENSMUSG00000004661	Arid3b	-1.029.401.119	-0.375574383	yes
chr9	58160128	58160913	ENSMUSG00000037206	Islr	-0.83564806	-0.758739816	yes
chr9	60793864	60795411	ENSMUSG00000034485	Uaca	0.328231723	0.184198758	yes
chr9	62509284	62510107	ENSMUSG00000041729	Coro2b	-0.496406035	-0.247409055	yes
chr9	69289378	69290885	ENSMUSG00000032238	Rora	0.590634902	0.32435274	yes
chr9	75625103	75626457	ENSMUSG00000032184	Lysmd2	0.577639007	0.573421809	yes
chr9	76566543	76567457	ENSMUSG00000032358	Fam83b	1.222.155.221	0.873174684	yes
chr9	81631613	81634419	ENSMUSG00000049511	Htr1b	1.210.229.298	0.558525442	yes
chr9	83145438	83147061	ENSMUSG00000066456	Hmgn3	0.20351444	0.222984921	no
chr9	83805185	83806752	ENSMUSG00000032262	Elovl4	0.325539454	0.195886887	no
chr9	90162362	90164144	ENSMUSG00000032363	Adamts7	0.499956265	0.372829081	yes
chr9	90269096	90269673	ENSMUSG00000037410	Tbc1d2b	0.629675943	0.775439304	yes
chr9	90270078	90271210	ENSMUSG00000037410	Tbc1d2b	0.360973441	0.350126412	yes
chr9	92249190	92250961	ENSMUSG00000032369	Plscr1	0.592931759	0.341996144	yes
chr9	92457459	92458276	ENSMUSG00000032377	Plscr4	0.729833874	0.354825748	yes
chr9	92541948	92543020	ENSMUSG00000032374	Plod2	1.153.210.365	0.632320759	yes
chr9	95405368	95406260	ENSMUSG00000033350	Chst2	0.581448318	0.331701848	no
chr9	95749660	95750770	ENSMUSG00000032839	Trpc1	0.518241597	0.260001144	yes
chr9	96888745	96890211	ENSMUSG00000043587	Pxylp1	0.263706248	0.19887248	no
chr9	102834635	102835654	ENSMUSG00000032547	Ryk	0.827897241	0.530051879	yes
chr9	105520752	105521473	ENSMUSG00000032570	Atp2c1	0.596840269	0.266057864	no
chr9	108831731	108833117	ENSMUSG00000023473	Celsr3	0.254297302	0.149044913	no
chr9	109196065	109196979	ENSMUSG00000049314	Fbxw13	-0.485596898	-0.358902192	yes
chr9	110624138	110625378	ENSMUSG00000032491	Nradd	0.893821241	0.414337307	yes
chr9	114026325	114026897	ENSMUSG00000032507	Fbxl2	0.850480702	0.786093138	yes
chr9	119401428	119403376	ENSMUSG00000061393	Acvr2b	0.533487036	0.547247736	yes
chr9	121950734	121951415	ENSMUSG00000038233	Fam198a	-0.762441358	-0.316868333	no
chrX	8892182	8893715	ENSMUSG00000052364	B630019K06Rik	0.992002207	0.601757135	yes
chrX	13845337	13847736	ENSMUSG00000031012	Cask	0.245912454	0.31531004	yes
chrX	36327959	36330377	ENSMUSG00000016239	Lonrf3	0.699394196	0.477406755	yes
chrX	53607785	53608421	ENSMUSG00000079593, ENSMUSG00000051851	Gm14597, Cxx1c	0.69393084	0.406287818	yes
chrX	53669514	53670926	ENSMUSG00000067924	Cxx1b	0.346802006	0.251195544	no
chrX	75577600	75578291	ENSMUSG00000031202	Rab39b	0.617748629	0.313481006	yes
chrX	75874665	75875310	ENSMUSG00000016382	Pls3	1.045.341.481	1.061.750.163	yes
chrX	78582822	78584685	ENSMUSG00000047996	Prrg1	0.401321935	0.152784902	no
chrX	85047983	85048903	ENSMUSG00000045103	Dmd	0.688535731	0.453955783	yes
chrX	93286030	93286810	ENSMUSG00000035277	Arx	0.531767345	0.471365157	yes
chrX	93288509	93291007	ENSMUSG00000035277	Arx	0.356357019	0.134175374	no
chrX	94540341	94542481	ENSMUSG00000025151	Maged1	0.779026954	0.318581276	yes
chrX	95025697	95026819	ENSMUSG00000071722	Spin4	0.941427066	0.558294669	yes
chrX	95165671	95166973	ENSMUSG00000025656	Arhgef9	0.56083498	0.359288663	yes
chrX	99975107	99976703	ENSMUSG00000059327	Eda	0.645738934	0.445137874	yes
chrX	103355959	103357459	ENSMUSG00000031327	Chic1	0.572980918	0.407394957	yes
chrX	103820850	103822760	ENSMUSG00000033965	Slc16a2	0.884723866	0.716198885	yes
chrX	105120016	105121821	ENSMUSG00000031227	Magee1	0.469715833	0.130814818	yes
chrX	119926796	119928054	ENSMUSG00000034732	Pabpc5	0.793280453	0.537556701	yes
chrX	122396648	122397837	ENSMUSG00000055733	Nap1l3	0.890601932	0.848897374	yes
chrX	123102952	123104132	ENSMUSG00000079450	3110007F17Rik	0.584034782	0.291760633	yes
chrX	134686171	134687164	ENSMUSG00000049804	Armcx4	0.509312949	0.256995453	yes
chrX	134807779	134809479	ENSMUSG00000033436	Armcx2	0.419774245	0.26380806	yes
chrX	135795739	135797653	ENSMUSG00000043384	Gprasp1	0.298382176	0.13742376	no
chrX	135838949	135840708	ENSMUSG00000072966	Gprasp2	0.616699188	0.505498238	yes
chrX	135885398	135886605	ENSMUSG00000072964	Bhlhb9	0.338933462	0.136600498	yes
chrX	136707799	136708790	ENSMUSG00000049536	Tceal1	0.747255493	0.523721818	yes
chrX	139609880	139611265	ENSMUSG00000031438	Rnf128	0.753081715	0.604019245	yes
chrX	141475311	141476114	ENSMUSG00000031273, ENSMUSG00000031274	Col4a6, Col4a5	0.775927063	0.66239732	yes
chrX	145504077	145506544	ENSMUSG00000041688	Amot	0.432799843	0.330361465	yes
chrX	150812534	150813743	ENSMUSG00000025268	Maged2	0.352335384	0.383515762	no
chrX	151046752	151048079	ENSMUSG00000025265	Fgd1	0.469265184	0.359683725	no
chrX	152143861	152145151	ENSMUSG00000041115	Iqsec2	0.420899431	0.28357833	yes
chrX	153006373	153007861	ENSMUSG00000067215	Usp51	0.312969244	0.233523796	yes
chrX	153036870	153038954	ENSMUSG00000047238	Mageh1	0.35136559	0.675286575	yes
chrX	153237312	153238659	ENSMUSG00000041649	Klf8	0.35223712	0.474464966	no
chrX	163760817	163761441	ENSMUSG00000083695	Rnf138rt1	0.630836774	0.3108378	no
chrX	164027757	164028435	ENSMUSG00000031373	Car5b	0.426968513	0.305854937	yes
chrX	168794895	168796824	ENSMUSG00000031355	Arhgap6	0.609758928	0.412372108	yes
