# Supplementary material for: Leveraging the Mendelian disorders of the epigenetic machinery to systematically map functional epigenetic variation
Source: eLife journal article supplement (doi:10.7554/elife.65884), 2021-08-31
Supplement: supp [file elife-65884-supp-v1.zip › elife_poa_e65884_Figure_2_source_data_2.xlsx]

## Sheet: Figure_2_Supp_Table_2.06282021
chr	start	end	prom_overlapping_id	prom_overlapping_name	logFC_KS1	logFC_KS2	logFC_RT	significant_at_FDR_05
chr1	17097140	17098163	ENSMUSG00000042686	Jph1	0.842737723	0.479512575	0.686735324	yes
chr1	20890076	20891551	ENSMUSG00000025931	Paqr8	0.278993496	0.149937575	0.339207588	no
chr1	24099576	24101041	ENSMUSG00000026153	Fam135a	0.488966742	0.555902313	0.768530797	yes
chr1	34010886	34012112	ENSMUSG00000026131	Dst	0.453320655	0.343693878	0.727626761	yes
chr1	36766358	36767837	ENSMUSG00000026117	Zap70	0.35190205	0.192563664	0.261207331	yes
chr1	42693693	42695184	ENSMUSG00000045515	Pou3f3	0.789467198	0.385001957	0.75087651	yes
chr1	42952688	42953654	ENSMUSG00000041907	Gpr45	0.701786591	0.731276875	0.708409876	yes
chr1	54250251	54251475	ENSMUSG00000025983	Ccdc150	0.650924637	0.543178473	0.588781019	yes
chr1	56972032	56973812	ENSMUSG00000038331	Satb2	0.345969793	0.399584368	0.323645502	yes
chr1	56977097	56978501	ENSMUSG00000038331	Satb2	0.471782914	0.25029174	0.368331389	yes
chr1	59481405	59483393	ENSMUSG00000041075	Fzd7	0.246800368	0.195967288	0.24888891	yes
chr1	60565227	60567600	ENSMUSG00000026014	Raph1	0.284645309	0.262478587	0.178921246	no
chr1	61638418	61639971	ENSMUSG00000052062	Pard3b	1334791936	0.506079648	1041982013	yes
chr1	66174793	66176157	ENSMUSG00000015222	Map2	0.72130547	0.276171095	0.41947536	yes
chr1	69688883	69689383	ENSMUSG00000025997	Ikzf2	0.590425531	0.457225936	0.858669688	yes
chr1	71652760	71653449	ENSMUSG00000026193	Fn1	0.898470766	0.833903116	1275895244	yes
chr1	80213353	80214230	ENSMUSG00000043230	Fam124b	0.654414421	0.243799336	0.824784054	no
chr1	85962028	85962616	ENSMUSG00000049608	Gpr55	-0.693771834	-0.383615811	-0.756847778	yes
chr1	89069535	89071062	ENSMUSG00000036206	Sh3bp4	0.366810642	0.397740064	0.219854153	no
chr1	93235431	93236803	ENSMUSG00000047793	Sned1	0.519113835	0.477675602	0.598018737	yes
chr1	94052118	94052795	ENSMUSG00000026285	Pdcd1	0.563370239	0.385395064	0.628240947	no
chr1	105356195	105357153	ENSMUSG00000047496	Rnf152	0.512846646	0.261434606	0.357298727	no
chr1	111864081	111865319	ENSMUSG00000038702	Dsel	0.485943637	0.192254003	0.70303654	no
chr1	118627490	118628457	ENSMUSG00000026380	Tfcp2l1	0.678477328	0.438763075	0.532022749	yes
chr1	136007238	136008361	ENSMUSG00000051985, ENSMUSG00000026411	Igfn1, Tmem9	0.511824996	0.433916366	0.522820809	yes
chr1	168431558	168432801	ENSMUSG00000052534	Pbx1	0.452346766	0.409028224	0.280776998	yes
chr1	170643997	170645295	ENSMUSG00000038463	Olfml2b	0.43307051	0.167652558	0.446862856	no
chr1	174501615	174503833	ENSMUSG00000028354	Fmn2	1060342328	0.370592219	1041967173	yes
chr1	178527226	178528647	ENSMUSG00000026494	Kif26b	0.529954138	0.341197318	0.66950344	yes
chr1	178530144	178530937	ENSMUSG00000026494	Kif26b	0.709895512	0.215990912	1274480909	no
chr1	189921433	189922790	ENSMUSG00000026603	Smyd2	0.525449461	0.532935521	0.576560828	yes
chr1	194618853	194620654	ENSMUSG00000026640	Plxna2	1015647351	0.740406983	1297868064	yes
chr1	195091629	195092879	ENSMUSG00000016493	Cd46	0.264305887	0.289424725	0.184404171	yes
chr10	3740207	3741539	ENSMUSG00000040624	Plekhg1	0.413363765	0.395057584	0.46056127	no
chr10	4712088	4713167	ENSMUSG00000019768	Esr1	0.626155435	0.500010285	0.470316678	yes
chr10	10557380	10558520	ENSMUSG00000019832	Rab32	0.653066774	0.252499575	0.65794647	yes
chr10	11343074	11344116	ENSMUSG00000055493	Epm2a	0.79505779	0.812059796	0.992633262	yes
chr10	18407130	18407923	ENSMUSG00000039835	Nhsl1	0.89550206	0.680467895	0.776821015	yes
chr10	18469010	18470343	ENSMUSG00000039835	Nhsl1	0.904976118	0.457018345	0.634512804	yes
chr10	18545462	18546329	ENSMUSG00000019853	Hebp2	1096587138	0.55390548	145297166	yes
chr10	39959706	39960654	ENSMUSG00000071335	G630090E17Rik	0.323780105	0.252179092	0.199861925	no
chr10	50893614	50895418	ENSMUSG00000019913	Sim1	0.645890422	0.554411997	0.632209834	yes
chr10	52232309	52234601	ENSMUSG00000019891	Dcbld1	0.377436789	0.227359279	0.161355304	yes
chr10	56377149	56379197	ENSMUSG00000050953	Gja1	1480695731	0.910281903	0.863917048	yes
chr10	67911356	67913042	ENSMUSG00000037855	Zfp365	0.74432427	0.407906011	0.241625023	no
chr10	74966747	74967746	ENSMUSG00000040009	Gnaz	0.497196694	0.341343582	0.420843105	yes
chr10	83722080	83723486	ENSMUSG00000087651	1500009L16Rik	0.519318008	0.29766083	0.49521697	yes
chr10	86498373	86499279	ENSMUSG00000059602	Syn3	0.617231016	0.350620776	0.94192055	no
chr10	105573429	105575610	ENSMUSG00000036019	Tmtc2	0.358365965	0.239021474	0.358709261	yes
chr10	108331629	108333800	ENSMUSG00000035873	Pawr	0.594574194	0.500361301	0.320018775	no
chr11	3863432	3864515	ENSMUSG00000020435	Osbp2	0.490968277	0.384737757	0.286505636	yes
chr11	5861520	5862566	ENSMUSG00000020473	Aebp1	0.442085765	0.249300896	0.425380311	no
chr11	5901793	5902336	ENSMUSG00000041798	Gck	0.771880094	0.544067474	0.74551229	yes
chr11	19018595	19021477	ENSMUSG00000020160	Meis1	0.487495164	0.362163377	0.681419824	yes
chr11	20830310	20832011	ENSMUSG00000042363	Lgalsl	0.28245696	0.214552979	0.266439443	yes
chr11	22000116	22002562	ENSMUSG00000005917	Otx1	0.358153166	0.354083518	0.693528181	yes
chr11	29373182	29374472	ENSMUSG00000032740	Ccdc88a	0.236221654	0.160771378	0.162053965	yes
chr11	30025660	30026429	ENSMUSG00000044072	Eml6	0.946305321	0.62795667	1385341585	yes
chr11	30266846	30268811	ENSMUSG00000020315	Sptbn1	0.640466862	0.470294857	0.803631445	yes
chr11	32299798	32300498	ENSMUSG00000020295	Hbq1a	0.671714547	0.367950796	0.438583869	no
chr11	43528129	43529609	ENSMUSG00000044707	Ccnjl	0.453103945	0.279873342	0.67504347	no
chr11	45849749	45850272	ENSMUSG00000006169	Clint1	0.304461718	0.215661268	0.347333225	no
chr11	46165925	46166935	ENSMUSG00000020411	Nipal4	0.384323256	0.220123783	0.312441375	no
chr11	51289391	51290832	ENSMUSG00000063564	Col23a1	0.34125674	0.17043977	0.351122701	yes
chr11	72266121	72267241	ENSMUSG00000020805	Slc13a5	0.598349931	0.337889506	0.745844434	yes
chr11	96464000	96465047	ENSMUSG00000057058	Skap1	-0.630505449	-0.176028922	-0.845388545	no
chr11	100414090	100415684	ENSMUSG00000006931, ENSMUSG00000001555	Leprel4, Fkbp10	0.396609214	0.317492849	0.32846047	yes
chr11	105589070	105590459	ENSMUSG00000053580	Tanc2	0.39679658	0.395650912	0.162147786	no
chr11	115133577	115134521	ENSMUSG00000047798	Cd300lf	-0.386141397	-0.301928413	-0.359812076	no
chr11	120950655	120951387	ENSMUSG00000025161	Slc16a3	0.425589331	0.664124302	0.663594474	no
chr11	121387741	121388756	ENSMUSG00000025170	Rab40b	0.650867596	0.491296897	0.820469569	yes
chr12	4038068	4039447	ENSMUSG00000020658	Efr3b	0.333009374	0.298433884	0.490240875	no
chr12	4132694	4133807	ENSMUSG00000020654	Adcy3	0.303483823	0.146173674	0.282921973	yes
chr12	17324175	17325488	ENSMUSG00000020566	Atp6v1c2	0.455094218	0.494193674	0.503271965	no
chr12	24830661	24832354	ENSMUSG00000020646	Mboat2	0.839471936	0.623121007	0.921300319	yes
chr12	33957002	33958861	ENSMUSG00000035799	Twist1	0.643492502	0.456920063	0.480079685	yes
chr12	57545103	57547342	ENSMUSG00000035451	Foxa1	0.693332928	0.40999418	101932475	yes
chr12	71830375	71832204	ENSMUSG00000034574	Daam1	0.390442511	0.296825791	0.548518384	yes
chr12	72441810	72442573	ENSMUSG00000021090	Lrrc9	0.840755628	0.806148406	0.477350502	no
chr12	72664150	72665430	ENSMUSG00000021094	Dhrs7	0.342483491	0.172476265	0.133735432	no
chr12	73111418	73113800	ENSMUSG00000034460	Six4	0.400967084	0.22883945	0.656141896	no
chr12	83762665	83764468	ENSMUSG00000021223	Papln	0.386037734	0.236821897	0.262078527	yes
chr12	85745692	85746795	ENSMUSG00000034258	Mfsd7c	0.664949493	0.238397859	0.668929462	no
chr12	90737826	90739153	ENSMUSG00000007682	Dio2	0.549656657	0.32528132	0.716178574	yes
chr12	91400112	91401159	ENSMUSG00000020963	Tshr	0.520884807	0.474956586	0.409416885	yes
chr12	119237721	119239222	ENSMUSG00000025321	Itgb8	1050999262	0.221586699	0.670196679	yes
chr13	4608597	4609517	ENSMUSG00000045410	Akr1e1	0.576577764	0.625110092	0.495469115	yes
chr13	9276270	9277733	ENSMUSG00000048264	Dip2c	0.922714816	0.592578381	0.847699828	yes
chr13	13783534	13785885	ENSMUSG00000021303	Gng4	0.427976667	0.301571444	0.377116111	yes
chr13	16011511	16012974	ENSMUSG00000041324	Inhba	0.798422017	0.452052176	0.466694474	yes
chr13	31558988	31560164	ENSMUSG00000038415, ENSMUSG00000090863	Foxq1, A530084C06Rik	0.623493852	0.478132261	0.590969537	yes
chr13	31625569	31627044	ENSMUSG00000038402	Foxf2	0.568796785	0.28300548	0.852244493	no
chr13	34343915	34345769	ENSMUSG00000038267	Slc22a23	0.532326331	0.548690514	0.302558042	yes
chr13	38150922	38152976	ENSMUSG00000054889	Dsp	0.449480847	0.215815628	0.469201041	yes
chr13	46501744	46502887	ENSMUSG00000021373	Cap2	0.514520116	0.482095419	0.681234866	yes
chr13	46929081	46931018	ENSMUSG00000021375	Kif13a	0.615578588	0.51095441	0.703142759	yes
chr13	54702111	54703161	ENSMUSG00000034918	Cdhr2	-0.405395126	-0.184197991	-0.50719551	yes
chr13	74008812	74010407	ENSMUSG00000021573	Tppp	0.358882187	0.234707999	0.5026003	yes
chr13	76384099	76385308	ENSMUSG00000021596	Mctp1	0.50300694	0.602502579	0.582566814	yes
chr13	88821019	88823416	ENSMUSG00000034488	Edil3	1020975857	0.386432661	0.511943102	yes
chr13	89739048	89741557	ENSMUSG00000021614	Vcan	0.65690318	0.316658202	0.481438014	yes
chr13	93143992	93145266	ENSMUSG00000047419	Cmya5	0.274202225	0.179274421	0.449209585	no
chr13	98205835	98206722	ENSMUSG00000021662	Arhgef28	0.667876439	0.289511238	0.864966824	no
chr13	103096220	103097236	ENSMUSG00000034751	Mast4	1076644372	0.238281163	1089320264	no
chr13	104863204	104864183	ENSMUSG00000042655	Fam159b	0.68734147	0.523861531	1154564857	yes
chr13	108213958	108215506	ENSMUSG00000021696	Elovl7	0.372381844	0.127763144	0.346074798	yes
chr14	6108378	6108910	ENSMUSG00000094634	Gm3468	0.755961733	0.398322739	1214288916	yes
chr14	7314750	7315495	ENSMUSG00000091472	Gm3739	1113167935	0.566942402	2144969582	yes
chr14	11160671	11162566	ENSMUSG00000060579	Fhit	0.706717348	0.392050266	0.188904735	yes
chr14	17659115	17661415	ENSMUSG00000021779	Thrb	0.596583427	0.251132733	0.621785794	yes
chr14	18893428	18894399	ENSMUSG00000058317	Ube2e2	0.807921491	0.626678463	0.843991591	yes
chr14	19584089	19585908	ENSMUSG00000093979	Gm2237	0.504825676	0.244323996	0.682380228	yes
chr14	21986885	21988926	ENSMUSG00000039081	Zfp503	1165208236	0.807542457	0.925331092	yes
chr14	51912735	51914372	ENSMUSG00000004558	Ndrg2	0.513421347	0.283929435	0.414469013	yes
chr14	51984063	51986171	ENSMUSG00000004562	Arhgef40	0.376141054	0.229518619	0.220162348	yes
chr14	66123928	66125047	ENSMUSG00000022040	Ephx2	0.498304858	0.146946063	0.245097377	no
chr14	76413893	76416161	ENSMUSG00000022010	Tsc22d1	0.810738021	0.545941817	0.619404381	yes
chr14	84442641	84443762	ENSMUSG00000035566	Pcdh17	0.847011785	0.343574212	1519396155	yes
chr14	99298253	99299461	ENSMUSG00000005148	Klf5	0.96758916	0.572310734	1106453535	yes
chr14	101607746	101609386	ENSMUSG00000033083	Tbc1d4	0.385916498	0.260880761	0.205670276	no
chr14	101729146	101730651	ENSMUSG00000053821, ENSMUSG00000033060	Gm9922, Lmo7	0.303255421	0.222755503	0.379704966	yes
chr14	105896925	105898020	ENSMUSG00000022114	Spry2	0.371036029	0.199178017	0.147582144	no
chr14	105898276	105899265	ENSMUSG00000022114	Spry2	0.308258346	0.1441163	0.269578787	no
chr14	115091774	115093018	ENSMUSG00000022112	Gpc5	0.338955237	0.222499924	0.47152483	yes
chr14	121035002	121036834	ENSMUSG00000025555	Farp1	0.767633737	0.434326513	0.97378346	yes
chr15	34237363	34239051	ENSMUSG00000022257	Laptm4b	0.376035381	0.247290394	0.277404123	yes
chr15	37791231	37792600	ENSMUSG00000051359	Ncald	0.573003796	0.490324648	0.425873693	yes
chr15	39005794	39007030	ENSMUSG00000022297	Fzd6	0.800807471	0.650751705	1418332236	yes
chr15	39942904	39944504	ENSMUSG00000022305	Lrp12	0.402708608	0.426960795	0.553182382	yes
chr15	41446953	41448090	ENSMUSG00000022307	Oxr1	0.526294826	0.470912055	0.748964456	yes
chr15	42674753	42677162	ENSMUSG00000022309	Angpt1	0.42908962	0.152632492	0.215780937	no
chr15	66968382	66970396	ENSMUSG00000005125	Ndrg1	0.389842504	0.135531976	0.168656277	yes
chr15	68927801	68929387	ENSMUSG00000022332	Khdrbs3	1053949953	0.759562246	0.539904714	yes
chr15	89591342	89592381	ENSMUSG00000022621	Rabl2	0.466303576	0.454495273	0.500621431	yes
chr15	93595039	93596657	ENSMUSG00000036158	Prickle1	1076767847	0.593885044	0.707352605	yes
chr15	98108081	98109215	ENSMUSG00000033065	Pfkm	0.404420411	0.30359311	0.33662201	yes
chr15	98832671	98832992	ENSMUSG00000067713	Prkag1	-0.379196692	-0.474519412	-0.302681354	no
chr15	103502468	103503775	ENSMUSG00000022489	Pde1b	0.265060839	0.231982398	0.212956757	no
chr16	4639782	4641601	ENSMUSG00000039646	Vasn	0.695676753	0.342035813	0.841614651	yes
chr16	16212735	16214451	ENSMUSG00000041957	Pkp2	0.441602678	0.4652998	0.804957279	yes
chr16	16828734	16829760	ENSMUSG00000022783	Spag6	0.540510326	0.246470075	0.271478643	yes
chr16	18347995	18348769	ENSMUSG00000000325	Arvcf	0.255598387	0.128734196	0.319259561	yes
chr16	21946818	21948010	ENSMUSG00000022856	Tmem41a	0.307437361	0.238505429	0.220922356	yes
chr16	26581024	26582269	ENSMUSG00000022514	Il1rap	0.198006633	0.174087175	0.153868179	no
chr16	31428467	31430347	ENSMUSG00000046598	Bdh1	0.198359433	0.137556023	0.238269726	no
chr16	38901877	38902770	ENSMUSG00000022790	Igsf11	0.370592915	0.210137275	0.314026486	yes
chr16	46496267	46498588	ENSMUSG00000022656	Pvrl3	0.686193303	0.596158786	0.817012665	yes
chr16	58407966	58409321	ENSMUSG00000035107	Dcbld2	0.311758005	0.189175931	0.372661164	yes
chr16	84773559	84775199	ENSMUSG00000053062	Jam2	0.457662883	0.195511336	0.492520686	yes
chr16	90829830	90831652	ENSMUSG00000039903	Eva1c	0.439362302	0.466821225	0.284582325	no
chr17	10839830	10841308	ENSMUSG00000037196, ENSMUSG00000023826	Pacrg, Park2	0.535023798	0.470469326	0.539436306	yes
chr17	21908774	21910217	ENSMUSG00000078546	2210404O09Rik	0.350189588	0.326202967	0.285997029	no
chr17	22738563	22740362	ENSMUSG00000098164	Gm5493	0.302743025	0.327428291	0.274157417	no
chr17	28349966	28351859	ENSMUSG00000002249	Tead3	0.36826906	0.127930118	0.220577419	no
chr17	43952341	43953318	ENSMUSG00000039601	Rcan2	0.71686271	0.429319011	0.876213836	yes
chr17	44078579	44079251	ENSMUSG00000023960	Enpp5	0.586072894	0.494774532	0.831656627	yes
chr17	44105228	44106212	ENSMUSG00000023961	Enpp4	0.60419826	0.662379504	0.653480742	yes
chr17	52601983	52602924	ENSMUSG00000035580	Kcnh8	0.870612229	0.313521602	0.383913112	no
chr17	55952173	55953357	ENSMUSG00000003206	Ebi3	-0.32777974	-0.289693622	-0.258392055	no
chr17	66448346	66450461	ENSMUSG00000052105	Mtcl1	0.561802104	0.390527794	0.582919063	yes
chr17	79052061	79052830	ENSMUSG00000024084	Qpct	0.384924087	0.166272611	0.618616617	no
chr17	79715483	79716132	ENSMUSG00000024087	Cyp1b1	0.653377139	0.340167858	0.580277627	yes
chr17	80127249	80128174	ENSMUSG00000035473	Galm	0.4893317	0.526629226	0.540493701	yes
chr17	83214176	83216061	ENSMUSG00000024247	Pkdcc	0.519638596	0.214055726	0.461001374	yes
chr17	88667520	88669002	ENSMUSG00000024154	Gtf2a1l	0.523664808	0.224169883	0.364903734	yes
chr17	90088125	90088787	ENSMUSG00000024109	Nrxn1	1504585715	0.410300988	0.913071752	yes
chr17	90454212	90456606	ENSMUSG00000024109	Nrxn1	1131312989	0.235847091	0.39798211	yes
chr18	13969894	13971625	ENSMUSG00000024420	Zfp521	0.459244763	0.365428712	0.974976762	yes
chr18	13972271	13972968	ENSMUSG00000024420	Zfp521	0.464338607	0.387105384	0.681197523	yes
chr18	21299608	21300951	ENSMUSG00000042680	Garem	106294648	1156133305	0.805330545	yes
chr18	24652991	24654626	ENSMUSG00000039616	Mocos	0.311689012	0.159567857	0.358261287	no
chr18	24708472	24710208	ENSMUSG00000054745, ENSMUSG00000034295	Gm9955, Fhod3	0.885081789	0.412903229	1039439573	yes
chr18	38600559	38602180	ENSMUSG00000024427	Spry4	0.430486156	0.124688961	0.202362904	yes
chr18	41950652	41951686	ENSMUSG00000056671	Prelid2	0.756622209	0.43874631	0.587419992	yes
chr18	57877910	57879626	ENSMUSG00000024597	Slc12a2	0.247443895	0.167212216	0.125611898	yes
chr18	61535598	61537094	ENSMUSG00000045094	Arhgef37	0.451097082	0.287650006	0.491671718	yes
chr18	68336974	68338623	ENSMUSG00000007480	Mc5r	0.352104674	0.298969476	0.410605377	yes
chr18	75695288	75697756	ENSMUSG00000052928	Ctif	0.6562059	0.761151931	0.46683925	yes
chr19	6070852	6071526	ENSMUSG00000024797	Vps51	-0.663141487	-0.532617218	-0.611334429	yes
chr19	10914094	10915337	ENSMUSG00000024734	Zp1	-0.344207395	-0.270157347	-0.170451478	no
chr19	24899391	24900803	ENSMUSG00000051490	Foxd4	0.529800221	0.420162292	0.517344485	yes
chr19	28677432	28680261	ENSMUSG00000052942	Glis3	0.651699184	0.536869125	0.357747277	yes
chr19	34629521	34630178	ENSMUSG00000067297	2010002M12Rik	-0.652077941	-0.597721164	-0.456820919	no
chr2	10372103	10373402	ENSMUSG00000061186	Sfmbt2	0.381774782	0.405866502	0.327545829	no
chr2	12301439	12302449	ENSMUSG00000026768	Itga8	0.353487609	0.326825382	0.242064385	no
chr2	12923724	12924691	ENSMUSG00000026730	Pter	0.799743425	0.660804695	0.573392757	yes
chr2	13010122	13011735	ENSMUSG00000049630	C1ql3	0.565588223	0.295267671	0.810736154	yes
chr2	27676399	27678033	ENSMUSG00000015846	Rxra	0.502550606	0.614996816	0.559557775	yes
chr2	29251134	29253952	ENSMUSG00000035513	Ntng2	0.317531572	0.304197277	0.229145394	yes
chr2	32896419	32896848	ENSMUSG00000026796	Fam129b	-0.952232448	-0.479778239	-0.517692397	yes
chr2	49619008	49620366	ENSMUSG00000026764	Kif5c	0.531437732	0.270578249	0.496654437	yes
chr2	51146938	51149366	ENSMUSG00000017144	Rnd3	0.528333468	0.176297804	0.344963362	no
chr2	57123146	57124701	ENSMUSG00000026826	Nr4a2	0.396912526	0.268344	0.295571374	yes
chr2	58324231	58325046	ENSMUSG00000026834	Acvr1c	0.540284888	0.217779684	0.404913864	yes
chr2	58357050	58358403	ENSMUSG00000026834	Acvr1c	0.911795211	0.354530154	0.55010548	yes
chr2	58566444	58568053	ENSMUSG00000026836, ENSMUSG00000026839	Acvr1, Upp2	0.552863764	0.590179367	0.386942404	yes
chr2	59160259	59162058	ENSMUSG00000036641, ENSMUSG00000026991	Ccdc148, Pkp4	0.413526801	0.247737981	0.657533143	yes
chr2	60962094	60963352	ENSMUSG00000026970	Rbms1	0.606249027	0.610089992	0.504086556	yes
chr2	65022014	65023265	ENSMUSG00000026888	Grb14	0.742049061	0.372483048	0.601449543	yes
chr2	66124003	66125425	ENSMUSG00000026994	Galnt3	0.543567125	0.535694998	0.769238753	yes
chr2	68470860	68472621	ENSMUSG00000027030	Stk39	0.86225617	0.418275326	0.579079346	yes
chr2	76406022	76407545	ENSMUSG00000042359	Osbpl6	0.535171058	0.459253785	0.630873469	yes
chr2	77169959	77170861	ENSMUSG00000044033	Ccdc141	0.593885806	0.39289471	0.891181914	yes
chr2	90782305	90783623	ENSMUSG00000040812	Agbl2	0.412540925	0.406365023	0.531283495	no
chr2	91457319	91458936	ENSMUSG00000027253	Lrp4	0.454439938	0.275383643	0.832533634	no
chr2	93333492	93334916	ENSMUSG00000027217	Tspan18	0.456554358	0.514529987	0.854181358	yes
chr2	104742352	104743361	ENSMUSG00000027173	Depdc7	0.359421526	0.390550138	0.293243146	no
chr2	105398460	105399816	ENSMUSG00000005973	Rcn1	0.364411918	0.242986279	0.16878975	no
chr2	105669505	105670320	ENSMUSG00000027168	Pax6	0.981582978	0.779127975	1275253942	yes
chr2	109917207	109918512	ENSMUSG00000050199	Lgr4	0.564342908	0.349792725	0.313766606	yes
chr2	121806305	121807704	ENSMUSG00000027238	Frmd5	0.590115049	0.387578082	0.80078935	yes
chr2	129372964	129373954	ENSMUSG00000027398	Il1b	-0.345011565	-0.231430121	-0.613049734	no
chr2	131491496	131492741	ENSMUSG00000027333	Smox	0.415484539	0.430460568	0.801832413	yes
chr2	135658431	135660102	ENSMUSG00000039943	Plcb4	0.454721278	0.606316709	0.397093208	yes
chr2	137114348	137115049	ENSMUSG00000027276	Jag1	0.748667403	0.486693403	100804205	yes
chr2	137116711	137117619	ENSMUSG00000027276	Jag1	0.635922972	0.700185554	0.640778493	yes
chr2	140395017	140396210	ENSMUSG00000068205	Macrod2	0.909619715	0.803350617	0.896560254	yes
chr2	151008384	151009972	ENSMUSG00000068115	Ninl	0.481396806	0.250786348	0.259657887	yes
chr2	165653097	165655640	ENSMUSG00000017897	Eya2	-0.314362335	-0.234326724	-0.213356886	yes
chr2	175141645	175142590	ENSMUSG00000090093	Gm14399	0.321213875	0.195007719	0.51976672	no
chr2	177205865	177206999	ENSMUSG00000078870	Gm14410	0.450722493	0.146933496	0.377827887	no
chr2	178077896	178079054	ENSMUSG00000078861	Zfp931	0.282926159	0.229144123	0.430100556	yes
chr2	180225242	180226260	ENSMUSG00000015647	Lama5	0.614587177	0.31297868	0.708581015	no
chr2	181188454	181189144	ENSMUSG00000016344	Ppdpf	-0.399319087	-0.299573176	-0.199663484	yes
chr3	7501713	7502211	ENSMUSG00000043542	Zc2hc1a	0.605870115	0.710814707	0.798503937	no
chr3	7502743	7504039	ENSMUSG00000043542	Zc2hc1a	0.376694135	0.496929435	0.664060663	yes
chr3	10087117	10088307	ENSMUSG00000049230	Gm9833	0.597833032	0.139859969	0.302202134	no
chr3	27983894	27984510	ENSMUSG00000027695	Pld1	0.785386968	1005481408	0.66186085	yes
chr3	30507039	30507748	ENSMUSG00000027684	Mecom	0.670202012	0.424661699	0.732727901	no
chr3	30508012	30508995	ENSMUSG00000027684	Mecom	0.872628	0.524134096	0.723179878	yes
chr3	36612842	36613938	ENSMUSG00000037325	Bbs7	0.446010899	0.331694833	0.335258254	yes
chr3	37348157	37349062	ENSMUSG00000037225	Fgf2	0.584931296	0.419041538	0.714978491	yes
chr3	40530864	40532073	ENSMUSG00000060798	Intu	0.661705586	0.276647923	0.500152917	yes
chr3	59005613	59007492	ENSMUSG00000056476	Med12l	0.883974122	0.32441631	0.621169895	yes
chr3	61002276	61003530	ENSMUSG00000027765	P2ry1	0.761859165	0.790849503	0.376007268	yes
chr3	69223435	69224306	ENSMUSG00000098207	Arl14	-0.412966181	-0.250193701	-0.497685397	no
chr3	75955996	75957474	ENSMUSG00000034109	Golim4	0.521451133	0.215530842	0.394556495	yes
chr3	84479275	84481078	ENSMUSG00000041842	Fhdc1	0.422874958	0.469128985	0.476009101	yes
chr3	85886754	85888766	ENSMUSG00000102805, ENSMUSG00000031286	RP24-559D1.1, Glt28d2	0.256013593	0.319070891	0.624769731	yes
chr3	94412630	94413574	ENSMUSG00000041912	Tdrkh	0.302749886	0.183257278	0.209986411	yes
chr3	97867428	97868864	ENSMUSG00000038170	Pde4dip	0.417751798	0.30398186	0.303970588	yes
chr3	101923363	101924879	ENSMUSG00000033147	Slc22a15	0.334563057	0.468612486	0.390689074	yes
chr3	106684481	106685519	ENSMUSG00000056260	Lrif1	0.416140157	0.289813622	0.392337814	yes
chr3	108880139	108881402	ENSMUSG00000045326	Fndc7	-0.239487714	-0.194959234	-0.223921436	no
chr3	109122617	109124311	ENSMUSG00000040322	Slc25a24	0.336308147	0.159625705	0.252250385	yes
chr3	122618601	122620947	ENSMUSG00000039735	Fnbp1l	0.287488503	0.181470679	0.16219495	no
chr3	122728727	122731020	ENSMUSG00000053965	Pde5a	0.528619775	0.235140197	0.551848002	yes
chr3	129213526	129214975	ENSMUSG00000028023	Pitx2	0.553715931	0.393465584	0.302989672	yes
chr3	129969040	129971134	ENSMUSG00000027994	Ccdc109b	0.559540328	0.475934866	0.412036083	yes
chr3	130180185	130181597	ENSMUSG00000058897	Col25a1	1076379239	0.677167232	0.372900744	yes
chr3	131302605	131303675	ENSMUSG00000027983	Cyp2u1	0.20801477	0.118724545	0.144836006	no
chr3	137623147	137624549	ENSMUSG00000046818	Ddit4l	0.689665326	0.496534715	0.826933409	yes
chr3	157924564	157925475	ENSMUSG00000028179	Cth	0.477918292	0.321497666	0.434873331	yes
chr4	12906743	12907497	ENSMUSG00000055963	Triqk	0.587148024	0.463817387	1108190389	yes
chr4	22486877	22490744	ENSMUSG00000095139	Pou3f2	0.298354326	0.23994601	0.278722154	yes
chr4	33188385	33189866	ENSMUSG00000054659	Pm20d2	0.588592628	0.310575278	0.276075408	no
chr4	33209001	33209994	ENSMUSG00000054679	Srsf12	0.305342166	0.151564903	0.24605323	no
chr4	41097028	41098753	ENSMUSG00000028435	Aqp3	0.334989554	0.173661848	0.259104399	no
chr4	41941543	41942650	ENSMUSG00000078747	Gm20878	0.555094637	0.672320555	0.302105608	no
chr4	42293839	42294995	ENSMUSG00000094695	Gm21953	0.481996448	0.671905377	0.416269841	yes
chr4	43875006	43876455	ENSMUSG00000028476	Reck	0.315399274	0.201981293	0.561997577	yes
chr4	53630904	53632133	ENSMUSG00000054752	Fsd1l	0.936194276	0.57019991	0.635886423	yes
chr4	57433935	57434796	ENSMUSG00000090053	Palm2	0.873991465	0.326762582	0.637783128	no
chr4	65604493	65605696	ENSMUSG00000051675	Trim32	0.280027603	0.204320441	0.556555637	no
chr4	93334503	93336031	ENSMUSG00000054000	Tusc1	0.595951325	0.319362358	0.789129508	yes
chr4	96591295	96592012	ENSMUSG00000015224	Cyp2j9	0.830232893	0.322805682	0.45022938	no
chr4	99032931	99033729	ENSMUSG00000028553	Angptl3	0.71180831	0.385433026	0.527118636	yes
chr4	99120314	99121337	ENSMUSG00000028556	Dock7	0.869146455	1061022039	1382193826	yes
chr4	99656179	99658092	ENSMUSG00000067261	Foxd3	0.605042659	0.454206348	0.380718518	no
chr4	101419118	101420689	ENSMUSG00000028527	Ak4	0.502056279	0.322763274	0.383384163	no
chr4	105109237	105110559	ENSMUSG00000028518	Prkaa2	0.328249299	0.189938044	0.425650978	yes
chr4	117835079	117836933	ENSMUSG00000028542	Slc6a9	0.208805214	0.304809415	0.158149386	no
chr4	119415008	119415902	ENSMUSG00000028637	Ccdc30	0.428027622	0.230698222	0.558674089	yes
chr4	123182855	123183919	ENSMUSG00000046093	Hpcal4	0.449800459	0.361230607	0.3686449	no
chr4	126734556	126736396	ENSMUSG00000042477	Tfap2e	0.360406103	0.183133668	0.395552963	no
chr4	142083612	142084839	ENSMUSG00000040616	Tmem51	-0.889782314	-0.223220607	-0.382826219	no
chr4	155468835	155469529	ENSMUSG00000023153	Tmem52	0.539589857	0.39973819	0.562456547	no
chr5	22343755	22345522	ENSMUSG00000042453	Reln	0.746427905	0.512934382	0.775728439	yes
chr5	33721264	33723430	ENSMUSG00000054252	Fgfr3	0.394521912	0.170866238	0.380026656	yes
chr5	33983152	33984148	ENSMUSG00000070858	Gm1673	0.46241938	0.429456605	0.725837121	yes
chr5	33995763	33997616	ENSMUSG00000048142	Nat8l	0.405780814	0.557665061	0.627435646	yes
chr5	36529780	36530715	ENSMUSG00000029192	Tbc1d14	0.426619447	0.338653041	0.518338976	yes
chr5	38684144	38685186	ENSMUSG00000046572	Zfp518b	0.443141268	0.332856789	0.359628615	yes
chr5	53809042	53810206	ENSMUSG00000039178	Tbc1d19	0.441115711	0.399797266	0.279975048	yes
chr5	72580259	72581196	ENSMUSG00000063935	Zar1	0.891188785	0.42887498	0.477557733	yes
chr5	73006798	73008697	ENSMUSG00000029219	Slc10a4	0.575760406	0.304451801	0.348172342	yes
chr5	103424801	103425582	ENSMUSG00000034573	Ptpn13	0.675069272	0.429411527	0.447533203	no
chr5	112254262	112255252	ENSMUSG00000066975, ENSMUSG00000029343	Cryba4, Crybb1	-0.467505177	-0.390897205	-0.61824898	yes
chr5	138227063	138228713	ENSMUSG00000047592	Nxpe5	-0.382577977	-0.270787414	-0.569317142	no
chr5	140733135	140734131	ENSMUSG00000050022	Amz1	-0.450242425	-0.155362337	-0.373107147	no
chr5	142700948	142702904	ENSMUSG00000050822	Slc29a4	0.380757864	0.304726603	0.228775272	yes
chr5	149264773	149265484	ENSMUSG00000060063	Alox5ap	-0.455858357	-0.244880013	-0.334764254	yes
chr6	6216509	6217515	ENSMUSG00000015112	Slc25a13	0.663201576	0.645360023	0.881602408	yes
chr6	7692656	7693422	ENSMUSG00000029752	Asns	1108947459	1080690563	1154090897	yes
chr6	21984951	21986805	ENSMUSG00000062980	Cped1	0.351223681	0.171133325	0.221213409	yes
chr6	28134722	28136309	ENSMUSG00000024211	Grm8	0.56260338	0.224997248	0.798658508	no
chr6	28831923	28833928	ENSMUSG00000049939	Lrrc4	0.262462947	0.224598069	0.293026031	no
chr6	29178310	29179739	ENSMUSG00000079654	Prrt4	0.641947712	0.333619634	0.500328238	yes
chr6	29396033	29397068	ENSMUSG00000029769	Ccdc136	0.36898278	0.386574814	0.566112646	no
chr6	29735200	29736611	ENSMUSG00000001761	Smo	0.550248458	0.472608148	0.604904697	yes
chr6	31563346	31564423	ENSMUSG00000025608	Podxl	0.608531727	0.596773464	0.886612924	yes
chr6	50455224	50456414	ENSMUSG00000029822	Osbpl3	0.367929555	0.322242389	0.671087615	no
chr6	52157024	52159031	ENSMUSG00000029844	Hoxa1	0.478243051	0.222353787	0.363508019	yes
chr6	53067629	53069024	ENSMUSG00000063568	Jazf1	0.508729549	0.454890933	0.419097325	yes
chr6	54039372	54040902	ENSMUSG00000004633	Chn2	-0.436004305	-0.2489914	-0.435442526	yes
chr6	58639950	58641015	ENSMUSG00000029802	Abcg2	0.718956185	0.294408743	0.528604801	yes
chr6	59023705	59024973	ENSMUSG00000037709	Fam13a	0.497416814	0.233633083	0.453346544	no
chr6	61179811	61181658	ENSMUSG00000039578	Ccser1	0.484445417	0.226689209	0.228207743	yes
chr6	67375818	67376572	ENSMUSG00000018341	Il12rb2	0.601708646	0.3698658	0.793590198	yes
chr6	71143730	71144451	ENSMUSG00000054474	Thnsl2	0.563077064	0.552124538	0.82442499	yes
chr6	84008339	84009344	ENSMUSG00000033788	Dysf	0.47399233	0.316743714	0.498700655	no
chr6	90369105	90370622	ENSMUSG00000034430	Zxdc	0.254915366	0.199173018	0.126892043	no
chr6	112273418	112274793	ENSMUSG00000057604	Lmcd1	0.633962969	0.27699507	0.71739173	yes
chr6	118065053	118067155	ENSMUSG00000030134	Rasgef1a	0.720381788	0.325410412	0.826215127	yes
chr6	118067772	118068147	ENSMUSG00000030134	Rasgef1a	0.699234383	0.542639986	0.744045107	yes
chr6	118454898	118455812	ENSMUSG00000030145	Zfp248	0.515240766	0.19883132	0.451364144	yes
chr6	128143007	128144323	ENSMUSG00000030352	Tspan9	0.556975527	0.482262532	0.329664415	yes
chr6	134413808	134414925	ENSMUSG00000030200	Bcl2l14	0.456846261	0.34011052	0.279925708	no
chr6	140423663	140425245	ENSMUSG00000030231	Plekha5	0.500748546	0.429154857	0.583789718	yes
chr6	147475588	147476952	ENSMUSG00000030301	Ccdc91	0.399514403	0.314647424	0.260164346	yes
chr6	148442783	148444896	ENSMUSG00000030306	Tmtc1	0.620667277	0.611764015	0.881589442	yes
chr6	149408404	149410131	ENSMUSG00000003452	Bicd1	0.483957763	0.265832456	0.597863964	yes
chr7	4835928	4836939	ENSMUSG00000053550	Shisa7	0.417759342	0.295183011	0.429603459	yes
chr7	16174394	16176323	ENSMUSG00000041420	Meis3	0.283214203	0.164353887	0.199218278	no
chr7	16245725	16246445	ENSMUSG00000074361	C5ar2	-0.582164128	-0.27148433	-0.623335153	no
chr7	17058094	17059793	ENSMUSG00000004328	Hif3a	-0.326416149	-0.284774014	-0.134230643	no
chr7	19092740	19095431	ENSMUSG00000040841	Six5	0.262765938	0.095339165	0.305215454	yes
chr7	28787967	28789457	ENSMUSG00000051735	Rinl	-0.255481364	-0.164262684	-0.143951224	no
chr7	29303524	29304326	ENSMUSG00000030584	Dpf1	0.461529742	0.282983422	0.477731222	yes
chr7	43352968	43353711	ENSMUSG00000039013	Siglecf	-0.351855512	-0.345323038	-0.338550466	no
chr7	52005231	52006595	ENSMUSG00000074093	Svip	0.407727291	0.312315856	0.554455879	yes
chr7	56018585	56019959	ENSMUSG00000047037	Nipa1	0.354691055	0.407762417	0.527223046	yes
chr7	66839296	66840855	ENSMUSG00000058145	Adamts17	0.5288557	0.304582538	0.765561257	yes
chr7	89403295	89405146	ENSMUSG00000049791	Fzd4	0.302221969	0.10635896	0.147318963	yes
chr7	90426007	90426954	ENSMUSG00000044362	Ccdc89	0.41038585	0.227610227	0.529781279	yes
chr7	98837640	98839346	ENSMUSG00000015957	Wnt11	0.413636315	0.20751111	0.290339916	yes
chr7	116039166	116040773	ENSMUSG00000051910	Sox6	0.299223551	0.113873937	0.355464656	no
chr7	118491046	118492493	ENSMUSG00000095115	Itpripl2	0.527017998	0.217152528	0.216813941	no
chr7	120102100	120103037	ENSMUSG00000030917	Tmem159	0.614417482	0.415310057	0.971090084	yes
chr7	133123964	133124614	ENSMUSG00000030849, ENSMUSG00000030970	Fgfr2, Ctbp2	0.803797227	0.573816543	1351587906	yes
chr7	136894087	136895046	ENSMUSG00000054612	Mgmt	0.675245176	0.517978857	0.702634668	yes
chr7	140947055	140948356	ENSMUSG00000025489	Ifitm5	-0.435168889	-0.258130521	-0.730728051	yes
chr7	141949188	141950864	ENSMUSG00000053046	Brsk2	0.524329385	0.371226939	0.620640331	yes
chr8	3392687	3393405	ENSMUSG00000004568	Arhgef18	1178214977	0.683677507	1113024283	yes
chr8	35825506	35827073	ENSMUSG00000055976	Cldn23	0.733636265	0.411384619	0.415852024	yes
chr8	46210387	46211589	ENSMUSG00000031633	Slc25a4	0.284124482	0.109398986	0.36615931	no
chr8	54076707	54078337	ENSMUSG00000031520	Vegfc	0.464920236	0.286516386	0.24570095	yes
chr8	60505660	60506421	ENSMUSG00000057228	Aadat	0.569481111	0.369440492	0.86649458	yes
chr8	60632302	60633309	ENSMUSG00000031647	Mfap3l	1023679728	0.748676287	0.615014437	yes
chr8	70806474	70807038	ENSMUSG00000000791	Il12rb1	-0.316498605	-0.338372431	-0.267091995	no
chr8	73352457	73354492	ENSMUSG00000004383	Large	0.555551791	0.377614599	0.580485472	yes
chr8	76898901	76900640	ENSMUSG00000031618	Nr3c2	1038880351	0.590864809	0.997908547	yes
chr8	76901625	76902656	ENSMUSG00000031618	Nr3c2	1333395283	0.44249755	1273171897	yes
chr8	79027827	79031154	ENSMUSG00000071064	Zfp827	0.296696792	0.231479023	0.304228265	yes
chr8	79397900	79399938	ENSMUSG00000031681	Smad1	0.19033221	0.106377738	0.296162474	no
chr8	84722706	84723898	ENSMUSG00000074203	G430095P16Rik	-0.384185468	-0.232138621	-0.24465291	no
chr8	95702367	95703725	ENSMUSG00000036564	Ndrg4	0.418748461	0.184840732	1067942212	no
chr9	8003095	8005165	ENSMUSG00000053110	Yap1	0.412947485	0.406943343	0.32739801	no
chr9	8042301	8043365	ENSMUSG00000053070	9230110C19Rik	0.583603119	0.197808915	0.35065241	yes
chr9	8133691	8134882	ENSMUSG00000040729	AK129341	0.963818877	0.605653983	0.42471049	yes
chr9	14751378	14752781	ENSMUSG00000049307	Fut4	0.398941651	0.168827109	0.383899426	no
chr9	15709055	15710485	ENSMUSG00000043885	Slc36a4	0.568465156	0.320277731	0.515917427	yes
chr9	21195886	21196770	ENSMUSG00000032177	Pde4a	-0.520269712	-0.48962461	-0.184254971	no
chr9	42944482	42945556	ENSMUSG00000032017	Grik4	0.44980952	0.219053218	0.741950686	yes
chr9	43105070	43106932	ENSMUSG00000059495	Arhgef12	0.360248675	0.476283365	0.494247053	yes
chr9	50727573	50728483	ENSMUSG00000032064	Dixdc1	0.819195893	0.600682489	0.668917225	yes
chr9	50738914	50739894	ENSMUSG00000032064	Dixdc1	0.492036909	0.315322997	0.323759093	yes
chr9	51962778	51963861	ENSMUSG00000032051	Fdx1	0.329675635	0.363943567	0.373433279	yes
chr9	53383929	53384799	ENSMUSG00000034487	Kdelc2	0.906718446	0.665754114	0.7313105	yes
chr9	54699044	54700231	ENSMUSG00000032285	Dnaja4	0.719883971	0.679232734	0.636890927	yes
chr9	60793864	60795411	ENSMUSG00000034485	Uaca	0.328231723	0.184198758	0.296388739	yes
chr9	69289378	69290885	ENSMUSG00000032238	Rora	0.590634902	0.32435274	0.29601992	no
chr9	75625103	75626457	ENSMUSG00000032184	Lysmd2	0.577639007	0.573421809	0.652405246	yes
chr9	81631613	81634419	ENSMUSG00000049511	Htr1b	1210229298	0.558525442	1156940082	yes
chr9	83145438	83147061	ENSMUSG00000066456	Hmgn3	0.20351444	0.222984921	0.176125706	no
chr9	83805185	83806752	ENSMUSG00000032262	Elovl4	0.325539454	0.195886887	0.252021473	no
chr9	90162362	90164144	ENSMUSG00000032363	Adamts7	0.499956265	0.372829081	0.371118255	yes
chr9	90270078	90271210	ENSMUSG00000037410	Tbc1d2b	0.360973441	0.350126412	0.28869655	yes
chr9	92541948	92543020	ENSMUSG00000032374	Plod2	1153210365	0.632320759	0.433772047	yes
chr9	96888745	96890211	ENSMUSG00000043587	Pxylp1	0.263706248	0.19887248	0.228728703	no
chr9	102834635	102835654	ENSMUSG00000032547	Ryk	0.827897241	0.530051879	0.659124538	yes
chr9	110624138	110625378	ENSMUSG00000032491	Nradd	0.893821241	0.414337307	1292349059	yes
chr9	114026325	114026897	ENSMUSG00000032507	Fbxl2	0.850480702	0.786093138	0.677608539	yes
chr9	119401428	119403376	ENSMUSG00000061393	Acvr2b	0.533487036	0.547247736	0.891536895	yes
chrX	8892182	8893715	ENSMUSG00000052364	B630019K06Rik	0.992002207	0.601757135	1480835152	yes
chrX	13845337	13847736	ENSMUSG00000031012	Cask	0.245912454	0.31531004	0.315945251	yes
chrX	36327959	36330377	ENSMUSG00000016239	Lonrf3	0.699394196	0.477406755	0.3632137	yes
chrX	53607785	53608421	ENSMUSG00000079593, ENSMUSG00000051851	Gm14597, Cxx1c	0.69393084	0.406287818	1074451781	yes
chrX	53669514	53670926	ENSMUSG00000067924	Cxx1b	0.346802006	0.251195544	0.448923276	no
chrX	75577600	75578291	ENSMUSG00000031202	Rab39b	0.617748629	0.313481006	1103593743	yes
chrX	75874665	75875310	ENSMUSG00000016382	Pls3	1045341481	1061750163	1394114779	yes
chrX	85047983	85048903	ENSMUSG00000045103	Dmd	0.688535731	0.453955783	0.869053594	yes
chrX	93286030	93286810	ENSMUSG00000035277	Arx	0.531767345	0.471365157	0.972795825	yes
chrX	93288509	93291007	ENSMUSG00000035277	Arx	0.356357019	0.134175374	0.411721603	no
chrX	94540341	94542481	ENSMUSG00000025151	Maged1	0.779026954	0.318581276	0.731457078	yes
chrX	95025697	95026819	ENSMUSG00000071722	Spin4	0.941427066	0.558294669	1272840552	yes
chrX	95165671	95166973	ENSMUSG00000025656	Arhgef9	0.56083498	0.359288663	0.908748721	yes
chrX	99975107	99976703	ENSMUSG00000059327	Eda	0.645738934	0.445137874	0.637499382	yes
chrX	103355959	103357459	ENSMUSG00000031327	Chic1	0.572980918	0.407394957	0.54135229	yes
chrX	103820850	103822760	ENSMUSG00000033965	Slc16a2	0.884723866	0.716198885	1181660073	yes
chrX	105120016	105121821	ENSMUSG00000031227	Magee1	0.469715833	0.130814818	0.368330449	yes
chrX	119926796	119928054	ENSMUSG00000034732	Pabpc5	0.793280453	0.537556701	0.484948418	yes
chrX	122396648	122397837	ENSMUSG00000055733	Nap1l3	0.890601932	0.848897374	1311335271	yes
chrX	123102952	123104132	ENSMUSG00000079450	3110007F17Rik	0.584034782	0.291760633	0.286279655	yes
chrX	134686171	134687164	ENSMUSG00000049804	Armcx4	0.509312949	0.256995453	1233105481	yes
chrX	134807779	134809479	ENSMUSG00000033436	Armcx2	0.419774245	0.26380806	0.350701009	yes
chrX	135795739	135797653	ENSMUSG00000043384	Gprasp1	0.298382176	0.13742376	0.222742283	no
chrX	135838949	135840708	ENSMUSG00000072966	Gprasp2	0.616699188	0.505498238	0.963915691	yes
chrX	135885398	135886605	ENSMUSG00000072964	Bhlhb9	0.338933462	0.136600498	0.256412649	yes
chrX	136707799	136708790	ENSMUSG00000049536	Tceal1	0.747255493	0.523721818	0.48803003	yes
chrX	139609880	139611265	ENSMUSG00000031438	Rnf128	0.753081715	0.604019245	0.933949226	yes
chrX	141475311	141476114	ENSMUSG00000031273, ENSMUSG00000031274	Col4a6, Col4a5	0.775927063	0.66239732	0.668668334	yes
chrX	145504077	145506544	ENSMUSG00000041688	Amot	0.432799843	0.330361465	0.600937786	yes
chrX	150812534	150813743	ENSMUSG00000025268	Maged2	0.352335384	0.383515762	0.464230896	no
chrX	151046752	151048079	ENSMUSG00000025265	Fgd1	0.469265184	0.359683725	0.440837189	no
chrX	153006373	153007861	ENSMUSG00000067215	Usp51	0.312969244	0.233523796	0.565348353	yes
chrX	153036870	153038954	ENSMUSG00000047238	Mageh1	0.35136559	0.675286575	0.566107313	yes
chrX	153237312	153238659	ENSMUSG00000041649	Klf8	0.35223712	0.474464966	0.467570017	no
chrX	164027757	164028435	ENSMUSG00000031373	Car5b	0.426968513	0.305854937	0.510262136	yes
chrX	168794895	168796824	ENSMUSG00000031355	Arhgap6	0.609758928	0.412372108	0.912907457	yes
