# Supplementary material for: Leveraging the Mendelian disorders of the epigenetic machinery to systematically map functional epigenetic variation
Source: eLife journal article supplement (doi:10.7554/elife.65884), 2021-08-31
Supplement: supp [file elife-65884-supp-v1.zip › elife_poa_e65884_Figure_2_source_data_3.xlsx]

## Sheet: Figure_2_Supp_Table_3
chr	start	end	prom_overlapping_id	prom_overlapping_name	logFC_KS1	logFC_KS2	significant_at_FDR_05
chr1	13598553	13601296	NA	NA	-0.29519563476015953	-0.2065522121834144	yes
chr1	13770957	13772480	NA	NA	0.31600039400489194	0.3003823259699309	yes
chr1	13984835	13986135	NA	NA	-0.3170558065297926	-0.2992259821344208	no
chr1	16228057	16228785	NA	NA	0.8587271961113803	0.5070144537330302	yes
chr1	21271263	21272364	NA	NA	0.4045780072189553	0.2920446584033007	no
chr1	23255892	23257072	NA	NA	0.8246580713713535	0.46514156281968155	yes
chr1	33882982	33884068	NA	NA	0.5018327823838491	0.28752403163277646	yes
chr1	34485209	34486429	NA	NA	-0.19841241186734335	-0.18350762900305587	no
chr1	35822243	35822988	NA	NA	0.5937185030029271	0.39284025572369335	no
chr1	36131214	36131780	NA	NA	-0.7037648385891655	-0.3680301490848043	yes
chr1	38904315	38905448	NA	NA	-0.8425202008945057	-0.4465179224708618	yes
chr1	40054808	40055646	NA	NA	-0.5176631919074289	-0.2663692787587817	yes
chr1	40380063	40380511	NA	NA	0.7196953325694194	0.589330661897197	no
chr1	42713100	42714970	NA	NA	0.7995958691284505	0.41300554142480994	yes
chr1	43375954	43376800	NA	NA	-0.3351521067433811	-0.34107941420439636	yes
chr1	58244203	58245184	NA	NA	0.5598873467516925	0.40552898465091086	yes
chr1	61135537	61136102	NA	NA	0.9330707435316115	0.4558483323064509	no
chr1	61180994	61181728	NA	NA	0.6269928597826979	0.6063183504681043	yes
chr1	61771293	61772016	NA	NA	0.6605165290776457	0.3572936550261224	no
chr1	70855675	70856301	NA	NA	0.6440323411072706	0.5224994315656886	yes
chr1	74067833	74069283	NA	NA	0.38987927531719124	0.3015195723360393	no
chr1	75486696	75488310	NA	NA	0.4978722250168124	0.29509172907259906	yes
chr1	84240130	84240674	NA	NA	-0.8778521273664781	-0.5499830913846313	yes
chr1	85034145	85035031	NA	NA	-0.5435725618823033	-0.35085323320464373	yes
chr1	85206438	85207449	NA	NA	-0.4717587691051321	-0.35696516917767457	yes
chr1	85987062	85987638	NA	NA	-0.9857821561727028	-0.6038494985422551	no
chr1	85988119	85989371	NA	NA	-0.8522385646258639	-0.7627182688322276	yes
chr1	86233712	86234415	NA	NA	-0.2924062208612787	-0.32419267357383735	no
chr1	86267256	86267868	NA	NA	-0.45653976752996495	-0.4853542464684393	yes
chr1	94034719	94036063	NA	NA	0.5910127462041509	0.36596498313010195	yes
chr1	100079515	100080465	NA	NA	0.6369229038305305	0.30665899253461054	yes
chr1	105973795	105974441	NA	NA	-0.5791092193183078	-0.3311221080979398	no
chr1	106030146	106032358	NA	NA	-0.7182046606071938	-0.305506604228711	yes
chr1	126817425	126818369	NA	NA	0.6840835361139823	0.3463782424340663	yes
chr1	127238884	127239167	NA	NA	-0.7696813873581406	-0.38032772953537136	no
chr1	127239826	127240475	NA	NA	-0.5038337446668808	-0.2751571166088037	yes
chr1	131145955	131146820	NA	NA	-0.22746721766268896	-0.17990641217378314	no
chr1	131700231	131700890	NA	NA	-0.4472602742517145	-0.22411379082415275	no
chr1	132292352	132293138	NA	NA	-0.3901287687483911	-0.42616919656533525	no
chr1	134083766	134083941	NA	NA	-0.4642801493162301	-0.23884543647095505	no
chr1	134987364	134988325	NA	NA	0.5109707844997408	0.3035784819643916	yes
chr1	135865461	135865988	NA	NA	0.7300278873541591	0.4859061572608266	no
chr1	138954880	138956339	NA	NA	-0.3147688012611918	-0.2978043878193485	no
chr1	139346149	139347339	NA	NA	1.0141e+16	0.625977072294295	yes
chr1	146967645	146968519	NA	NA	1261581597151640	0.5954222817263802	yes
chr1	150164719	150165833	NA	NA	0.8762934317076443	0.7290134201520074	yes
chr1	152615975	152618622	NA	NA	-0.5204604097195423	-0.25783801393203887	yes
chr1	154994026	154995006	NA	NA	0.7192756747161323	0.508615541969966	yes
chr1	159998122	159998822	NA	NA	-0.3604105960241216	-0.2682636250536289	no
chr1	161908926	161909719	NA	NA	-0.701672243775144	-0.4264376727808765	yes
chr1	162207147	162207866	NA	NA	0.7076486677585939	0.6252420296221629	yes
chr1	165322005	165323383	NA	NA	0.5181509215220386	0.3441922025039229	no
chr1	167268220	167270134	NA	NA	-0.3271680884187426	-0.24415643660113562	yes
chr1	171660438	171660715	NA	NA	-0.7195336087045447	-0.4135996510223451	no
chr1	173429785	173431251	NA	NA	-0.32839794230076536	-0.3032414719689116	no
chr1	178924398	178925011	NA	NA	0.7623119685329456	1.00038e+16	no
chr1	182244895	182245442	NA	NA	-0.7301371261858262	-0.32135456774087906	no
chr1	182959232	182960560	NA	NA	0.33519397715877686	0.5552188121644454	no
chr1	182990709	182991356	NA	NA	0.5012255481816389	0.516485192555537	no
chr1	183633584	183634412	NA	NA	0.6324396447601308	0.3868933055215671	no
chr1	183851229	183851973	NA	NA	0.48395307623734346	0.4948937751385146	no
chr1	185351932	185352636	NA	NA	0.6560251674977018	0.373748588751199	yes
chr1	195209752	195210636	NA	NA	-0.5766956649918165	-0.3261624629685771	yes
chr10	7390414	7393576	NA	NA	0.6787154638374452	0.438408163978235	yes
chr10	8213670	8214644	NA	NA	0.5164530993516442	0.22624482124344597	yes
chr10	11309807	11310285	NA	NA	0.7161304254126603	0.6678069653445181	yes
chr10	13987433	13989004	NA	NA	-0.2688013931869414	-0.20807240368446858	no
chr10	14083867	14084319	NA	NA	-0.5302498862874993	-0.33647726456644855	yes
chr10	18318256	18319596	NA	NA	0.9488223715780731	0.5807231344611478	yes
chr10	18430258	18431277	NA	NA	0.5755476156850873	0.38264606837256504	no
chr10	18526848	18528841	NA	NA	0.5729560788300115	0.3048329300473294	yes
chr10	20119391	20119905	NA	NA	0.6120726487783668	0.7690395608542187	no
chr10	22058251	22059271	NA	NA	0.30642968633349316	0.16751826878134427	no
chr10	50901067	50901538	NA	NA	0.6890741577951411	0.6210264818784896	yes
chr10	50910293	50911305	NA	NA	0.8891885957200014	0.44431108412424547	yes
chr10	56368987	56369584	NA	NA	1.19039e+16	0.7242552098644072	yes
chr10	56712348	56713214	NA	NA	0.7193749369451926	0.7520104553795975	yes
chr10	59889462	59889637	NA	NA	-0.8403776155183454	-0.4572926488983545	yes
chr10	60738419	60738951	NA	NA	-0.43625579166799294	-0.30542777094998225	no
chr10	61121453	61122394	NA	NA	-0.3797039184326168	-0.1964270491359255	no
chr10	61625481	61626363	NA	NA	0.5568416365285834	0.5542982240707305	yes
chr10	66955258	66956043	NA	NA	-0.4390559193015484	-0.414438703294208	yes
chr10	76798687	76799673	NA	NA	0.47788671161471447	0.4032724357654411	yes
chr10	81404700	81405288	NA	NA	-0.5998450472439127	-0.2554564398064472	yes
chr10	82889997	82891675	NA	NA	-0.3304760882862912	-0.3340278043974903	no
chr10	82991756	82992739	NA	NA	-0.3154932073785245	-0.3673062968731009	yes
chr10	84554045	84555030	NA	NA	-0.31961014763429213	-0.18891627098734579	no
chr10	94426067	94426967	NA	NA	0.40478459847228243	0.2253142742276197	no
chr10	95262429	95262998	NA	NA	-0.5895953633654785	-0.42834606497807126	yes
chr10	95297716	95298323	NA	NA	-0.6600023704784347	-0.4390974092251107	yes
chr10	95302727	95303133	NA	NA	-0.7382714081706151	-0.4350797253543607	yes
chr10	116727273	116728516	NA	NA	-0.7891557082040179	-0.34018925521544874	yes
chr10	117925403	117926455	NA	NA	-0.5256886676389272	-0.3516000968277596	yes
chr10	127135147	127136000	NA	NA	-0.5324473905910334	-0.19716510438645865	no
chr11	4535715	4537282	NA	NA	-0.42731941644551036	-0.22703374933847376	yes
chr11	11532916	11533149	NA	NA	-0.8358553160655195	-0.4824223333765454	yes
chr11	18874965	18878423	NA	NA	0.35878727387167053	0.37264160291855675	yes
chr11	23067367	23068430	NA	NA	0.31968685502826966	0.26986737616180434	yes
chr11	24138690	24139908	NA	NA	-0.22280707049638399	-0.19120163114483035	yes
chr11	25288012	25288977	NA	NA	0.3863636207962213	0.2708630653294457	no
chr11	26600488	26601116	NA	NA	-0.3807372584913453	-0.35958522660561376	no
chr11	29383896	29384482	NA	NA	0.7356437124786167	0.5309156123375183	yes
chr11	29685765	29686777	NA	NA	-0.3942693183840878	-0.3495797174602584	yes
chr11	29931821	29932403	NA	NA	0.8093880595387732	0.597153797615717	yes
chr11	31948698	31949856	NA	NA	0.33761034121591327	0.28906428055617556	no
chr11	32324404	32325055	NA	NA	0.4223615062923807	0.32048909103577244	yes
chr11	44685769	44686664	NA	NA	-0.3562634218715904	-0.2530532191775933	yes
chr11	46189740	46190382	NA	NA	0.7736554071977683	0.4783711137999615	no
chr11	50473604	50474540	NA	NA	-0.4991895634763361	-0.5375693340817922	yes
chr11	51646837	51647313	NA	NA	-0.4314253642810246	-0.26327011718960946	no
chr11	53839018	53840743	NA	NA	-0.30669237440412284	-0.3802800284360362	no
chr11	58789502	58790564	NA	NA	-0.7385756319418627	-0.3430295273977006	yes
chr11	60184804	60186627	NA	NA	-0.6040979100401843	-0.2677732010980787	yes
chr11	74100782	74101748	NA	NA	-0.8588931066048711	-0.9218772544602183	yes
chr11	74521843	74524358	NA	NA	-0.4730940415060806	-0.30053839177508146	yes
chr11	74567738	74568313	NA	NA	-0.7310554745967777	-0.31954026093323284	no
chr11	74575736	74576329	NA	NA	-0.8403485703186823	-0.46329280301722653	yes
chr11	75636362	75637140	NA	NA	-0.7407650636207858	-0.336878422767805	yes
chr11	76482108	76483764	NA	NA	-0.4090486864265422	-0.22819331270553195	yes
chr11	77354811	77356061	NA	NA	-0.3531479948850007	-0.2778053399784562	no
chr11	79017055	79017807	NA	NA	-0.2854024897572677	-0.21748941422562532	no
chr11	80718963	80719783	NA	NA	-0.5674877140522961	-0.31311769317314725	no
chr11	80932152	80932615	NA	NA	-1.53401e+16	-0.8168099595518759	yes
chr11	80939449	80940201	NA	NA	-0.6599497817338507	-0.4485833218483006	yes
chr11	83572011	83572823	NA	NA	-0.30837352392601114	-0.21315723048969165	no
chr11	83595490	83596374	NA	NA	-0.6043185823859988	-0.309080239703104	no
chr11	86231146	86232598	NA	NA	-0.3350376056286384	-0.22463554386057968	no
chr11	86364355	86365051	NA	NA	-0.8634788119554395	-0.385805350144614	no
chr11	86907415	86908525	NA	NA	-0.3190141800040387	-0.1963589368768358	yes
chr11	88559183	88560091	NA	NA	-0.31202272373593687	-0.3244374565445955	no
chr11	88604725	88606532	NA	NA	-0.5761490143264895	-0.3358890302406376	yes
chr11	94587492	94587781	NA	NA	-0.5489351015563174	-0.35904052106166817	no
chr11	94589500	94589869	NA	NA	-0.5733866912759424	-0.341493546079729	yes
chr11	95869704	95870854	NA	NA	-0.24673585443895177	-0.29937931051124206	no
chr11	97321816	97322610	NA	NA	-0.34023293959867623	-0.25839944885088373	no
chr11	97718073	97719529	NA	NA	-0.467126665236022	-0.29043168930510177	yes
chr11	103372034	103372936	NA	NA	-0.3671176863802663	-0.25713277919326594	no
chr11	104367630	104368943	NA	NA	-0.35140244458331077	-0.2622985825352967	yes
chr11	105362719	105363564	NA	NA	0.3513732630446164	0.26771305418923913	no
chr11	106571462	106572268	NA	NA	-0.5196300633044102	-0.440479082338542	yes
chr11	108235127	108236124	NA	NA	-0.5450763888408481	-0.3724909205792821	yes
chr11	108244077	108244562	NA	NA	-0.3390102351875366	-0.2697912571012745	yes
chr11	108525724	108526966	NA	NA	0.5803056570557867	0.577721026894812	no
chr11	113761421	113762642	NA	NA	-0.5140274289884158	-0.5692676920712766	yes
chr11	113777258	113779969	NA	NA	-0.6449408109505312	-0.2551924038514282	yes
chr11	113785839	113786259	NA	NA	-0.564056204689859	-0.38242214003459274	no
chr11	113786765	113787871	NA	NA	-0.5406197171241818	-0.3000346452873373	yes
chr11	113788229	113789034	NA	NA	-0.3925895176756849	-0.39376998352343884	yes
chr11	113802060	113803942	NA	NA	-0.3701823808579515	-0.22255955329358026	yes
chr11	114747543	114748322	NA	NA	-0.3308164956054656	-0.36461939262881127	no
chr11	114815203	114815732	NA	NA	-0.6729667370240124	-0.4813580809616544	yes
chr11	114882896	114883829	NA	NA	-0.4691579974367969	-0.29092651478329257	yes
chr11	115639066	115639354	NA	NA	-0.3212139289866274	-0.22797616714296007	no
chr11	115902769	115903358	NA	NA	-0.35634942125895236	-0.2543872931264365	no
chr11	116405767	116406966	NA	NA	-0.30510501952120905	-0.2836925669036934	no
chr11	116811078	116811910	NA	NA	0.4839553631537512	0.3363928598273511	no
chr11	117458968	117460437	NA	NA	-1.13527e+16	-0.31078792213377887	no
chr11	117476703	117477154	NA	NA	-1165600154027670	-0.4805032074906547	yes
chr11	119126316	119128577	NA	NA	-0.40855869734983286	-0.22933349977978318	yes
chr12	3338577	3339897	NA	NA	-0.2485524439693846	-0.2500902451319478	no
chr12	8344709	8345520	NA	NA	-0.3999855503739346	-0.4075304682271679	no
chr12	8347654	8348456	NA	NA	-0.5238873840831944	-0.36858228464485976	yes
chr12	8351050	8351798	NA	NA	-0.44982102349199804	-0.3221947684955546	yes
chr12	12400944	12401793	NA	NA	0.6966540795719756	0.6174804688062019	yes
chr12	16054576	16056837	NA	NA	-0.3623509030692786	-0.3145849046528243	no
chr12	17032546	17033713	NA	NA	0.3802567310896484	0.28885540924896536	yes
chr12	17881252	17882661	NA	NA	0.41563201145937184	0.2129761085068419	yes
chr12	21192111	21193215	NA	NA	0.680948687230612	0.32497108557229987	yes
chr12	21462535	21463952	NA	NA	-0.29666755145593393	-0.2278136320464799	yes
chr12	25319587	25320430	NA	NA	-0.5808682811953672	-0.4138122033280179	yes
chr12	35885034	35885487	NA	NA	0.7901225060175011	0.582098637243384	yes
chr12	39665584	39665872	NA	NA	0.8913898953004918	0.6692464168434105	yes
chr12	72427735	72428050	NA	NA	0.7064152033987336	0.5602108470820201	yes
chr12	72461573	72462314	NA	NA	0.4766631917719674	0.32586594848316824	no
chr12	72820918	72821591	NA	NA	0.6805903704239042	0.5695213080564104	yes
chr12	73052166	73054346	NA	NA	0.3980004048393188	0.49793104303198243	no
chr12	76546715	76548222	NA	NA	-0.34575567322030715	-0.20293224247742891	no
chr12	79017840	79018562	NA	NA	-0.3760171718307086	-0.29938719756308135	yes
chr12	79630122	79630782	NA	NA	-0.480726977309533	-0.2759001974707187	no
chr12	80833283	80835203	NA	NA	-0.31793609042898596	-0.21442863460162573	no
chr12	81970838	81972312	NA	NA	-0.3179646886167108	-0.2887285082517738	no
chr12	82265398	82266150	NA	NA	-0.7543706335152103	-0.43004824416297627	yes
chr12	82744038	82744475	NA	NA	-0.788456640896245	-0.6451101094685042	yes
chr12	85182065	85183332	NA	NA	-0.4730425072138052	-0.3149132669166913	no
chr12	86046028	86048086	NA	NA	-0.468955816000853	-0.4337497099671741	yes
chr12	91668310	91669155	NA	NA	0.7279994632806679	0.6263301559278768	yes
chr12	91802813	91803965	NA	NA	0.3787368889242262	0.362000485328699	no
chr12	100839155	100840001	NA	NA	-0.28589754614712537	-0.3566354890691728	no
chr12	101014483	101014762	NA	NA	-0.5845369991914657	-0.2719615305967126	no
chr12	102301893	102303176	NA	NA	-0.34743673948516657	-0.23402965075269733	no
chr12	102304362	102304632	NA	NA	-0.7278306088198618	-0.5807607122575816	yes
chr12	102310138	102310871	NA	NA	-0.41776456217407004	-0.36187992387319173	yes
chr12	102651782	102653092	NA	NA	-0.47742663682117736	-0.33827493844453166	no
chr12	110854868	110855411	NA	NA	-0.6097237763684147	-0.27391795270756325	yes
chr12	111794004	111795320	NA	NA	0.6998044736971286	0.358128871741243	yes
chr12	112849143	112850748	NA	NA	-0.5959131245893358	-0.3092789664600615	yes
chr13	5634935	5635692	NA	NA	0.78981456991197	0.37665348969809825	no
chr13	12711095	12712470	NA	NA	-0.352028275761945	-0.28009412761881114	yes
chr13	13349210	13349879	NA	NA	-0.5363872456354941	-0.4233461497023923	no
chr13	13446506	13447973	NA	NA	-0.6054006046114835	-0.30368590444886284	yes
chr13	13537224	13538123	NA	NA	-0.6413646659682947	-0.5897016940742701	yes
chr13	16017310	16017969	NA	NA	0.9025978072673915	0.5366844888035701	yes
chr13	17626897	17627685	NA	NA	0.634496605867551	0.3975614912848845	yes
chr13	21233695	21234665	NA	NA	0.48564355063073655	0.44964423577152585	yes
chr13	21505961	21506813	NA	NA	0.262965702791395	0.16564119078339476	yes
chr13	24514898	24515752	NA	NA	-0.31154426643548094	-0.22507994490756128	yes
chr13	31658112	31658856	NA	NA	0.7238526146203728	0.5558807197642357	no
chr13	35155889	35156269	NA	NA	-1.21535e+16	-0.5786447831559026	no
chr13	41628436	41629679	NA	NA	-0.4369516731405546	-0.4308322124325172	yes
chr13	42828823	42829718	NA	NA	0.6309350386409452	0.41321074118601747	no
chr13	44584079	44585471	NA	NA	-0.4672917241365225	-0.4885853320918511	yes
chr13	46337680	46338343	NA	NA	-0.3658324203432254	-0.19080460374142563	no
chr13	46339623	46340893	NA	NA	-0.27524188403606975	-0.15921958353280596	no
chr13	52564890	52565803	NA	NA	-0.2880478861609061	-0.3259112846006032	no
chr13	54242220	54242644	NA	NA	0.57369808225948	0.45011689498297847	no
chr13	56613304	56614130	NA	NA	-0.5633787199388957	-0.272135477807547	no
chr13	56615723	56616820	NA	NA	-0.5287190677925298	-0.37172291362498505	yes
chr13	59666345	59666953	NA	NA	-0.6701486978318654	-0.36489419557113084	yes
chr13	74259567	74260920	NA	NA	0.8833777473384943	0.5218387090901527	yes
chr13	78162974	78164004	NA	NA	0.5563746318661275	0.4260613978546994	yes
chr13	81351221	81352631	NA	NA	0.8531738924680372	0.5877146486446373	yes
chr13	84347444	84349574	NA	NA	0.7704969945049508	0.351488361824118	yes
chr13	89583866	89584437	NA	NA	1045188381692080	0.5692194310114814	no
chr13	90886183	90886953	NA	NA	0.6624273828595529	0.4627864565713932	no
chr13	92738547	92739512	NA	NA	0.4098048935459068	0.302107988320136	yes
chr13	92940406	92941120	NA	NA	0.5604627853144374	0.41478418090871444	yes
chr13	96983113	96984367	NA	NA	0.5962603719692827	0.3625654227426689	yes
chr13	100682788	100683474	NA	NA	-0.4499096761544864	-0.3133995941201281	no
chr13	100892111	100892965	NA	NA	0.5792539123591154	0.38364497232230144	yes
chr13	101735523	101737250	NA	NA	-0.5588747448242208	-0.24064628233390192	no
chr13	102760867	102761639	NA	NA	0.6264839069400768	0.4461885066812954	yes
chr13	105047091	105047802	NA	NA	0.5552466542017224	0.42009262349067455	no
chr13	108191120	108191610	NA	NA	0.8135408158723049	0.3936294092404959	no
chr13	109557676	109558488	NA	NA	0.6496977852132372	0.7205950346125315	yes
chr13	109781164	109782181	NA	NA	0.3186735280607617	0.18312798339768657	no
chr13	115096954	115097256	NA	NA	0.711714697497882	0.4575352060468578	no
chr13	120063198	120063896	NA	NA	0.7452618827924287	0.6248100394510439	yes
chr14	6755994	6757659	NA	NA	0.786796171588968	0.39105332472822546	yes
chr14	7658347	7659162	NA	NA	0.7166499195118837	0.5972957087623806	yes
chr14	8346389	8347199	NA	NA	0.5086113914823052	0.44136645272093206	no
chr14	13901627	13902074	NA	NA	0.5711219255537336	0.4970159812640227	yes
chr14	16008186	16010557	NA	NA	-0.44676020322554344	-0.28684111554738556	yes
chr14	20167551	20168821	NA	NA	-0.34183413590375705	-0.2706861053216716	yes
chr14	20173422	20174483	NA	NA	-0.3906456608100521	-0.23153739953753397	yes
chr14	20178882	20179566	NA	NA	-0.48523899983083635	-0.3616578851372149	yes
chr14	21985751	21986532	NA	NA	0.7159560987537072	0.7117787268748471	yes
chr14	21993622	21994413	NA	NA	1.02484e+16	0.630464172517046	yes
chr14	21995230	21995863	NA	NA	0.8044653908277101	0.39385957563006485	no
chr14	25513488	25514228	NA	NA	-0.3259006165450613	-0.20923834327106203	no
chr14	25530091	25530999	NA	NA	-0.512833424769825	-0.39161548358207426	yes
chr14	26858062	26858916	NA	NA	-0.46885505162683044	-0.3825123342279471	yes
chr14	27412280	27414508	NA	NA	-0.3025075068139672	-0.21236266251735977	yes
chr14	30248064	30248590	NA	NA	-0.5858109255493891	-0.3529797484929435	no
chr14	31401870	31403196	NA	NA	-0.5755757027874551	-0.37419833962286464	yes
chr14	31407590	31408577	NA	NA	-0.3849490730115348	-0.3265643893113868	yes
chr14	34768323	34770056	NA	NA	0.3527042351308601	0.30255546239076536	yes
chr14	50970677	50971517	NA	NA	-0.5113767290852669	-0.42811046952908355	yes
chr14	59335749	59336361	NA	NA	-0.6112576869675267	-0.3817007893100443	yes
chr14	60485234	60486187	NA	NA	0.5996835639423017	0.364915099920635	yes
chr14	67188444	67189198	NA	NA	0.4917448960047182	0.2968515763298884	yes
chr14	74935206	74935507	NA	NA	-0.438329656531449	-0.37773177886391707	no
chr14	75024563	75025624	NA	NA	-0.291554383519032	-0.2238484936823055	yes
chr14	76569060	76569813	NA	NA	-0.608437103414996	-0.44575539980848344	yes
chr14	76582353	76582925	NA	NA	-0.48589674605907274	-0.35786527869629603	no
chr14	77533723	77533947	NA	NA	-0.7431181465342687	-0.6238760940986054	yes
chr14	102975963	102976256	NA	NA	-0.33827585679092315	-0.2539968670996434	no
chr14	105886578	105887570	NA	NA	0.40536756464067375	0.2856428268839546	no
chr14	118179853	118181003	NA	NA	0.348456314288717	0.4197733495455323	yes
chr14	118231043	118232084	NA	NA	0.5703645417541262	0.3699600783040499	yes
chr14	121996648	121997210	NA	NA	-0.5592756721197224	-0.35307133286958786	yes
chr15	7998786	7999426	NA	NA	0.5643502700937766	0.4939931073429136	no
chr15	10329094	10330634	NA	NA	0.34639256976962945	0.377176479234418	yes
chr15	10583149	10583928	NA	NA	0.3294881658403128	0.26564577521393584	no
chr15	12588549	12589218	NA	NA	0.4592636756316744	0.32805019303378535	no
chr15	12667648	12668575	NA	NA	0.4430069496655629	0.3175820995605972	yes
chr15	27670062	27672264	NA	NA	-0.3521274675634242	-0.24858531435301912	yes
chr15	31166195	31167288	NA	NA	0.5776979707853754	0.6750500195319653	yes
chr15	31264615	31265348	NA	NA	0.4452952647433713	0.28811340504179994	no
chr15	36210295	36211023	NA	NA	0.4725113819160208	0.41536179581818083	yes
chr15	36930450	36930695	NA	NA	-0.449506062527007	-0.2994234103455119	no
chr15	37765732	37766704	NA	NA	1043164989965330	0.6644445170046307	yes
chr15	38607191	38607841	NA	NA	-0.33093253574340953	-0.21949609413849036	no
chr15	38709628	38710750	NA	NA	0.8208055235730936	0.4533482180523817	yes
chr15	44748185	44748860	NA	NA	0.6956308743919571	0.6894058355238571	no
chr15	65726813	65727529	NA	NA	0.5075549509675527	0.5862565880053977	no
chr15	68960331	68960974	NA	NA	1.08823e+16	0.5017232688182135	yes
chr15	69077801	69078673	NA	NA	0.6337457476145405	0.36112787725360385	yes
chr15	73137212	73137994	NA	NA	-0.3935688061483755	-0.27841627531520735	yes
chr15	73545376	73546206	NA	NA	-0.5253064713720551	-0.2964277939011478	yes
chr15	76765738	76766081	NA	NA	-0.6591966185082919	-0.42756365940520963	yes
chr15	78591579	78592254	NA	NA	-0.4774536482298389	-0.26826435603680215	yes
chr15	80517808	80519036	NA	NA	-0.41201530538902265	-0.36091695403608715	no
chr15	82217073	82217431	NA	NA	-0.6473864194563789	-0.34894531149113994	yes
chr15	82235603	82237199	NA	NA	-0.3095010820839487	-0.36769315436396377	no
chr15	84714385	84715418	NA	NA	-0.5006834544648144	-0.33073316735214353	yes
chr15	88489901	88491176	NA	NA	-0.4351702055231189	-0.35700045304132033	yes
chr15	88890617	88891855	NA	NA	0.6042477307431477	0.32967524380184793	yes
chr15	97212658	97213380	NA	NA	0.8117740516184548	0.42003602889277675	yes
chr15	97849159	97850739	NA	NA	-0.2530392302832027	-0.1484311481016455	yes
chr16	13447188	13448709	NA	NA	0.4607748132605687	0.3070578029641941	yes
chr16	15886458	15888578	NA	NA	0.4058465674465472	0.28790131497773047	yes
chr16	18589857	18591055	NA	NA	0.39213094696258227	0.3245575273048212	no
chr16	18626087	18627116	NA	NA	0.3348757341861059	0.19324230764119332	yes
chr16	21845833	21846551	NA	NA	0.5281283592835767	0.6476283204670169	yes
chr16	23897663	23899291	NA	NA	0.48956383493791006	0.3961335311301456	yes
chr16	24434164	24435959	NA	NA	-0.3356167542435912	-0.2370447950136754	yes
chr16	30652263	30653353	NA	NA	-0.4232223038906543	-0.4288280605827148	no
chr16	31507322	31508707	NA	NA	-1.07916e+16	-0.4571130939733593	yes
chr16	42189857	42190983	NA	NA	0.5649482563241524	0.2473719187818921	yes
chr16	44992964	44994105	NA	NA	-0.35540786409407527	-0.2735325124906111	yes
chr16	50118163	50118749	NA	NA	-0.60822567711378694	-0.4355543525314286	no
chr16	69937410	69938137	NA	NA	1.09042e+16	0.3805109816046832	no
chr16	75617755	75618198	NA	NA	0.6941808313704901	0.8198737289712975	no
chr16	78559913	78560604	NA	NA	-0.2945318521585461	-0.26490713288279527	no
chr16	93780382	93781744	NA	NA	-0.42576540538535446	-0.2591644616449418	yes
chr16	93798496	93799343	NA	NA	-0.4882426023976026	-0.28056264468948516	no
chr16	94723985	94725295	NA	NA	0.31284031729657025	0.37412768401775437	yes
chr16	95359786	95361043	NA	NA	-0.4264278340861199	-0.32936139078476456	yes
chr17	5097490	5097821	NA	NA	-0.7902149328156188	-0.509213905845477	yes
chr17	5574550	5575140	NA	NA	-0.4237232721281668	-0.3979133398049576	no
chr17	8197583	8198026	NA	NA	-0.312147057485535	-0.2261835705640348	yes
chr17	8223348	8223765	NA	NA	-0.8690345986220612	-0.31583000629814717	yes
chr17	8224126	8224342	NA	NA	-0.6217616174990868	-0.4554642352811553	yes
chr17	13493562	13494204	NA	NA	-0.5622770357137725	-0.49578267579062973	no
chr17	13532179	13533082	NA	NA	-1.12462e+16	-0.5514086652397423	yes
chr17	13558623	13559516	NA	NA	-0.9999808690525803	-0.5814663332284997	yes
chr17	13573142	13573607	NA	NA	-0.985348108453678	-0.6210615363962775	yes
chr17	13658909	13660421	NA	NA	-0.5506604214061454	-0.2711792302028484	yes
chr17	16891202	16892118	NA	NA	-1.034e+16	-0.591737687586277	yes
chr17	17633726	17634823	NA	NA	-0.40566851213202215	-0.3685222720941986	yes
chr17	22080696	22081608	NA	NA	0.7883224495399388	0.5168278975916395	yes
chr17	25451744	25451998	NA	NA	0.7511844552232118	0.6931165861350367	yes
chr17	27000894	27002289	NA	NA	-0.4327400019896843	-0.24377014835847113	no
chr17	31439463	31440427	NA	NA	-0.6766764062419202	-0.32446578076931387	yes
chr17	32550923	32551501	NA	NA	0.6043042780749425	0.5262160586859711	yes
chr17	32895281	32895848	NA	NA	-0.47416270255597553	-0.2784514669306804	yes
chr17	34373372	34373721	NA	NA	-0.6082216002891183	-0.41789183385860096	yes
chr17	36134869	36136326	NA	NA	-0.3295120181505294	-0.19953410691039455	no
chr17	37028479	37029358	NA	NA	0.30038115938942905	0.34497688572624446	no
chr17	48426707	48428626	NA	NA	-0.27634474479305876	-0.27220668507246737	yes
chr17	48457878	48458596	NA	NA	-0.33335459845074733	-0.3707594875812951	no
chr17	55841082	55841770	NA	NA	-0.7432646074245801	-0.4637600016180052	yes
chr17	63092134	63093668	NA	NA	0.40531841349869374	0.21385330216998658	no
chr17	73226360	73227580	NA	NA	-0.6224545478529672	-0.3489067469562828	yes
chr17	80501120	80502294	NA	NA	-0.4044312931657517	-0.534825371055279	yes
chr17	81668559	81670664	NA	NA	0.7553870284466109	0.4033373208362699	yes
chr17	83657097	83658253	NA	NA	-0.36689016763341575	-0.22716602330165608	no
chr17	88403040	88404066	NA	NA	0.3770299509079271	0.23405009249111222	no
chr17	90584305	90585184	NA	NA	0.7629274698404296	0.5219497016005974	yes
chr18	7404846	7405631	NA	NA	0.8512836144966713	0.4649495896610022	yes
chr18	7692752	7693898	NA	NA	0.41803414909501846	0.2797239792208798	yes
chr18	10893844	10894740	NA	NA	-0.3141651936597121	-0.36296313836409666	no
chr18	20696593	20697730	NA	NA	-0.43333289618800835	-0.3014509386899555	yes
chr18	20698049	20698859	NA	NA	-0.41295370262204817	-0.3068003544010024	no
chr18	24852198	24852938	NA	NA	0.7827568681923103	0.36232501810276696	yes
chr18	24872061	24872580	NA	NA	0.8852791293751276	0.45144495241298627	no
chr18	31628204	31628969	NA	NA	0.36754014031158816	0.38853485245865726	yes
chr18	34138652	34140546	NA	NA	-0.3430437426804256	-0.3353473449533898	yes
chr18	35913328	35913851	NA	NA	-0.4132350575585884	-0.35951620548166524	yes
chr18	55050018	55051310	NA	NA	0.29750982031284084	0.22004902936282586	no
chr18	56769259	56769764	NA	NA	0.6907730599833595	0.7044207046397074	no
chr18	57837146	57837633	NA	NA	0.9654099249765077	0.5716849862085118	yes
chr18	62726486	62727331	NA	NA	-0.47414075573919334	-0.33716073306462163	yes
chr18	69498342	69499965	NA	NA	0.48863378564522214	0.23595215987737048	yes
chr18	70420089	70420763	NA	NA	0.5905369554493294	0.3514954319431643	yes
chr18	77869709	77870466	NA	NA	0.7847264280913696	0.47460720976317006	yes
chr18	81927180	81928386	NA	NA	0.4116865547479718	0.3364893125366905	no
chr18	82756706	82757190	NA	NA	0.6713643079140406	0.5272701899893324	no
chr19	7116174	7118578	NA	NA	-0.29290142788934365	-0.22519696061524141	yes
chr19	7122215	7122784	NA	NA	-0.5247516730976379	-0.41565778738341697	yes
chr19	7226318	7227198	NA	NA	-0.5039789635960928	-0.31347110828083957	yes
chr19	8251707	8253046	NA	NA	0.47146440602220424	0.28303573020330125	no
chr19	9074472	9075197	NA	NA	-0.43366168378988496	-0.40740096473566473	yes
chr19	9103706	9104749	NA	NA	-0.4083038595575222	-0.27471662295631355	yes
chr19	9107314	9107631	NA	NA	-0.6714458565875774	-0.4984533357610568	yes
chr19	9707679	9708872	NA	NA	-0.5911994390652823	-0.23578917775584926	yes
chr19	10582044	10582441	NA	NA	-0.48793828913303205	-0.2306780643661463	no
chr19	12556320	12556926	NA	NA	-0.332289248643749	-0.24814830907603838	no
chr19	23056587	23057969	NA	NA	0.684088802883643	0.42881821268677783	yes
chr19	23781825	23782493	NA	NA	0.777671864277551	0.36962152210896715	yes
chr19	26506764	26507283	NA	NA	-1.37154e+16	-0.4872679596039496	yes
chr19	30998502	30999047	NA	NA	0.47430803213826167	0.3639992401176556	no
chr19	37233651	37234500	NA	NA	0.5744879085091974	0.47542364269505244	no
chr19	40267121	40268030	NA	NA	-0.22820076273990642	-0.15327831026329344	no
chr19	40977048	40978729	NA	NA	-0.2390201218917913	-0.19840743203277164	no
chr19	43726310	43727273	NA	NA	-0.3571755897844388	-0.32460014662701697	yes
chr19	44314239	44315331	NA	NA	0.48754163454745264	0.28757695364481795	yes
chr19	46454078	46455543	NA	NA	-0.6367472342627298	-0.30399417191691847	yes
chr19	46510643	46511780	NA	NA	-0.38142025883557895	-0.20287475045807102	no
chr19	46563963	46564656	NA	NA	-0.592660225573262	-0.5051763610799851	yes
chr19	47454907	47455673	NA	NA	-0.35646480402658487	-0.34310947300891587	no
chr19	58825090	58825703	NA	NA	-0.8292562335106444	-0.5327801056748261	yes
chr19	60679042	60679513	NA	NA	-0.5928542358084458	-0.7410491058217312	no
chr19	60934389	60935438	NA	NA	-0.41394915057052506	-0.302522092253945	yes
chr2	3910197	3910787	NA	NA	0.5636371123742511	0.5353076863620014	yes
chr2	7114991	7115766	NA	NA	0.8352784250106973	0.37442014636306603	yes
chr2	7269863	7270425	NA	NA	1.07941e+16	0.6304119270719425	yes
chr2	11894544	11895600	NA	NA	0.5319334238406951	0.4027507174762319	yes
chr2	13767428	13767951	NA	NA	-0.9171544765998003	-0.5071982491678801	yes
chr2	27468937	27470089	NA	NA	-0.32007526326017743	-0.2348281743212291	no
chr2	29194271	29195307	NA	NA	0.30715530117286033	0.15826520656798984	no
chr2	29655060	29656614	NA	NA	-0.34421400328289353	-0.321870336656769	no
chr2	30246314	30247008	NA	NA	-0.5904083881204556	-0.26674393716661315	no
chr2	30690102	30691486	NA	NA	-0.3766939873014484	-0.35807055424466366	yes
chr2	31455193	31455823	NA	NA	-0.8359419763536861	-0.30238633469723586	yes
chr2	31459091	31460714	NA	NA	-0.4112459207310487	-0.37359864519881486	no
chr2	35253704	35254244	NA	NA	-0.31296223266068157	-0.3887799889208127	no
chr2	35677718	35678445	NA	NA	-0.6139010270153822	-0.4394590719320299	yes
chr2	44556813	44558252	NA	NA	0.7845579058762084	0.36166176782315484	yes
chr2	44981512	44982153	NA	NA	0.37586370106106093	0.2678397683754012	no
chr2	46245466	46246166	NA	NA	0.6369698094589942	0.4509092622472188	yes
chr2	46370643	46371694	NA	NA	0.6496725425236162	0.5597175817984363	yes
chr2	46443201	46444350	NA	NA	0.6618566083324847	0.6543094493512207	yes
chr2	46524884	46525747	NA	NA	0.899810391985816	0.39872719746160606	yes
chr2	59521846	59522955	NA	NA	0.3982246513622577	0.3219981981739664	no
chr2	65413566	65415373	NA	NA	0.4191965239381573	0.2547413469651381	yes
chr2	69128444	69129552	NA	NA	0.3797100965098032	0.2313501975587132	no
chr2	70105626	70106142	NA	NA	-0.7236761192027459	-0.6936956031277451	yes
chr2	78994949	78995957	NA	NA	-0.6051314706496953	-0.3456549703940139	yes
chr2	83625050	83626115	NA	NA	0.47119471415006814	0.3169660145264231	yes
chr2	91476107	91477230	NA	NA	1.05532e+16	0.5841652739111031	yes
chr2	93154312	93156187	NA	NA	-0.29790134893470877	-0.424540119392297	no
chr2	93976108	93977192	NA	NA	0.41365755961626743	0.2787914160942159	yes
chr2	94272907	94273983	NA	NA	0.5296636605373513	0.5026987194797946	no
chr2	102195225	102196121	NA	NA	-0.4703282108237885	-0.3539077976099053	yes
chr2	102283579	102284124	NA	NA	-0.545495190931642	-0.3859660081000407	yes
chr2	102341148	102342081	NA	NA	-0.4154418097156937	-0.26592161787570484	yes
chr2	118713425	118714115	NA	NA	-0.43894512730492147	-0.37039488516548047	yes
chr2	120577880	120578955	NA	NA	-0.40566872291116035	-0.2954170688794599	yes
chr2	127328248	127329038	NA	NA	-0.4941337108247776	-0.4675499469195417	yes
chr2	128100664	128101422	NA	NA	-0.5457879067154414	-0.3115469806816936	no
chr2	129338011	129338769	NA	NA	-0.462411463243142	-0.294095757150498	yes
chr2	129385173	129386042	NA	NA	-0.3693216446456006	-0.2961833404710314	yes
chr2	132035122	132035984	NA	NA	-0.38090861660234576	-0.19338104555973257	yes
chr2	132509191	132510118	NA	NA	-0.39406591450116346	-0.2718946288582102	yes
chr2	132658231	132659016	NA	NA	-0.5284105101794724	-0.2741484076082297	no
chr2	150828287	150828543	NA	NA	-0.5808456998861646	-0.40534836365229016	yes
chr2	152111854	152112448	NA	NA	0.7067952650128778	0.43153503491572376	yes
chr2	152991394	152992176	NA	NA	-0.9891966261508948	-0.5178433446325214	yes
chr2	153332422	153333571	NA	NA	-0.8788452420555093	-0.3801318031927864	yes
chr2	154757691	154758016	NA	NA	0.698405958989143	0.5314963128132585	no
chr2	158132956	158133697	NA	NA	0.8076233785960109	0.5262718585551998	no
chr2	163709892	163711295	NA	NA	-0.44460889372760465	-0.23846844633037975	no
chr2	164866500	164867393	NA	NA	-0.4690186009809668	-0.2734214092559555	yes
chr2	166401398	166402319	NA	NA	-0.7562189328013054	-0.45906374602217415	yes
chr2	166548956	166550332	NA	NA	-0.3882856944759449	-0.3081519054018176	no
chr2	166617727	166618236	NA	NA	-0.40244064609872215	-0.3757281043550586	no
chr2	166653713	166653932	NA	NA	-0.4896501086722005	-0.46144024561240704	no
chr2	166662717	166663420	NA	NA	-0.7592921701419263	-0.42970191185092876	yes
chr2	166667072	166667685	NA	NA	-0.5715999065824521	-0.3594018422212967	yes
chr2	166719108	166720086	NA	NA	-0.40980670617300424	-0.31725368261533154	yes
chr2	166732292	166733757	NA	NA	-0.36517434600498255	-0.46824322379305244	yes
chr2	166973889	166975203	NA	NA	-0.2840459852800391	-0.19602658666382422	no
chr2	166976415	166976835	NA	NA	-0.519171318257098	-0.4098400146600456	yes
chr2	168429390	168430324	NA	NA	-0.37005743527192847	-0.4189091967793444	no
chr2	173349349	173350483	NA	NA	-0.40052410612133704	-0.5359021209135706	no
chr2	178516251	178517696	NA	NA	-0.3219839726759869	-0.20932876561258237	no
chr2	180894313	180895111	NA	NA	0.5647084108469831	0.37710698014064864	yes
chr3	8634857	8635899	NA	NA	0.4521248415074626	0.39492439983025596	yes
chr3	15125496	15127149	NA	NA	-0.2786370470353634	-0.2333606168481994	no
chr3	19368848	19369445	NA	NA	-0.5727610641444578	-0.513955485862476	yes
chr3	20825628	20826120	NA	NA	0.7268216596756043	0.686594473402164	no
chr3	27689319	27690565	NA	NA	0.5927244930483008	0.5106998616693591	yes
chr3	28171103	28171815	NA	NA	0.6691308917134406	0.32037138999276293	yes
chr3	32317390	32318323	NA	NA	0.780320766360013	0.46834036568297144	yes
chr3	37605657	37606369	NA	NA	0.5651062255522473	0.4827941387900381	yes
chr3	50628106	50628793	NA	NA	1.10778e+16	0.7697616079380136	yes
chr3	68611172	68611754	NA	NA	0.5795149459832646	0.46910698041198334	yes
chr3	79746396	79747375	NA	NA	0.5026127062908867	0.26674086754524673	yes
chr3	86206331	86207200	NA	NA	-0.45805163590724307	-0.2223158560505183	no
chr3	87514949	87516153	NA	NA	-0.29577614011583825	-0.28957116168546704	no
chr3	88235122	88235790	NA	NA	-0.49479974462636966	-0.34412495466669063	yes
chr3	89295467	89296025	NA	NA	-0.7239132777337336	-0.4056531128402033	no
chr3	96251667	96252512	NA	NA	-0.5214682770898678	-0.2420675752504517	yes
chr3	97232294	97232862	NA	NA	-0.46069481042687394	-0.3007609054219634	yes
chr3	97255131	97256669	NA	NA	-0.8436174548621173	-0.3499647953176357	yes
chr3	104762360	104762657	NA	NA	0.9413566085092517	0.6236788388906233	no
chr3	108886022	108886648	NA	NA	-1.00418e+16	-0.3453780326586833	no
chr3	108902000	108902642	NA	NA	-0.5151819112455075	-0.33243185621695653	yes
chr3	121967483	121968304	NA	NA	0.5889580362041245	0.28447088817949456	yes
chr3	130125813	130126222	NA	NA	0.9575371309770311	0.6855889785762767	yes
chr3	143585333	143585898	NA	NA	0.7051452997357338	0.4569601870718884	no
chr3	146583410	146584506	NA	NA	0.7223449879378184	0.45453481555304187	yes
chr3	148335865	148336765	NA	NA	0.6044801031768965	0.4400539721418425	yes
chr3	148850020	148851282	NA	NA	0.4069337762258887	0.26943003125692316	no
chr3	149143165	149143842	NA	NA	1078366666352350	0.5905247920336022	yes
chr3	152105385	152105808	NA	NA	0.8385122213609894	0.5218517990949059	no
chr3	152106301	152107275	NA	NA	0.5932987329844861	0.4281222351411083	no
chr3	152895046	152895240	NA	NA	-0.802217821136133	-0.5966887235891071	yes
chr3	152928399	152930721	NA	NA	-0.4742823959075673	-0.23486340268634934	yes
chr3	153248619	153249312	NA	NA	-1.28366e+16	-0.406745431959972	yes
chr3	153260366	153261399	NA	NA	-1.09512e+16	-0.2857169786102061	yes
chr3	153262460	153263194	NA	NA	-1.16147e+16	-0.3233609100534667	no
chr3	153276043	153276756	NA	NA	-0.9401548310206465	-0.4855726637562868	yes
chr3	153292920	153293193	NA	NA	-1.05431e+16	-0.5823797972542076	yes
chr3	153565858	153566792	NA	NA	-0.8434950885979305	-0.3861968895216721	yes
chr4	3495809	3496640	NA	NA	-0.5476846464824953	-0.29706113584097377	yes
chr4	3508210	3508850	NA	NA	-0.9796319853362551	-0.5911960642898315	no
chr4	3510679	3512069	NA	NA	-0.5503720090337919	-0.5176232874314014	yes
chr4	3523639	3524588	NA	NA	-0.6724369026446178	-0.5485587791228989	yes
chr4	8737389	8738266	NA	NA	-0.40699009423706384	-0.330296669366637	no
chr4	9135723	9136437	NA	NA	0.3853564052991964	0.3914962547973526	no
chr4	9647430	9647640	NA	NA	-0.6313664826284634	-0.4852164632233715	no
chr4	24680067	24680723	NA	NA	0.9295455667523281	0.9019600583926978	yes
chr4	24942926	24943539	NA	NA	0.8381176412440923	0.7660459631287485	yes
chr4	24966110	24967124	NA	NA	1.41329e+16	0.6968066077909495	yes
chr4	31823511	31824880	NA	NA	0.407248442908563	0.3062076402209176	yes
chr4	34429178	34430093	NA	NA	0.5778965575221108	0.4171239415781347	yes
chr4	41910301	41911117	NA	NA	0.7751890120426235	0.43364352846730536	yes
chr4	42262265	42263202	NA	NA	0.621216103498023	0.47800340990800766	yes
chr4	43970480	43970960	NA	NA	-0.7323950649911679	-0.23013635134456564	no
chr4	45948573	45950028	NA	NA	-0.2770381082668098	-0.2372941089692649	yes
chr4	46592033	46592846	NA	NA	-0.2972360886852328	-0.259814677906112	no
chr4	55327308	55329298	NA	NA	-0.3873498358351821	-0.2715013134333533	no
chr4	62322439	62323112	NA	NA	-0.39739872832797685	-0.3408415394684568	no
chr4	67071082	67071692	NA	NA	1.17576e+16	0.6761758405894652	yes
chr4	87367854	87369199	NA	NA	0.4906783398003416	0.2809199274305146	yes
chr4	88449946	88450640	NA	NA	0.7065380983478083	0.4538708796830005	yes
chr4	99354042	99355148	NA	NA	0.4099097905077744	0.2923815463336998	yes
chr4	106313095	106313490	NA	NA	-0.4260956469448921	-0.39482565970604205	yes
chr4	106589934	106591287	NA	NA	0.7595790804378547	0.269119607333418	yes
chr4	106981320	106981988	NA	NA	-0.5487006225395984	-0.36043338464465	no
chr4	108638567	108639169	NA	NA	0.5318776562337564	0.43765480852015054	yes
chr4	114651940	114653276	NA	NA	-0.3073920226753334	-0.19620206228033724	yes
chr4	115062612	115064228	NA	NA	0.3739378282299446	0.44011804501149854	no
chr4	117476535	117478624	NA	NA	-0.5196954692464351	-0.2869767447144384	yes
chr4	117921015	117921957	NA	NA	-0.5246728940842715	-0.3288341429697928	yes
chr4	123014006	123014554	NA	NA	-0.4456367176318307	-0.32538025215729366	no
chr4	124703598	124704228	NA	NA	-0.5334535137729802	-0.26310243584180903	yes
chr4	130905700	130906368	NA	NA	-0.33455129371076375	-0.41319396660443913	no
chr4	134759679	134760277	NA	NA	-0.5497250636007336	-0.5112736837602697	yes
chr4	134967899	134968793	NA	NA	-0.4618329646198118	-0.39380689106778094	yes
chr4	135225760	135226753	NA	NA	-0.3125057537285851	-0.2813604762180112	yes
chr4	135883383	135884757	NA	NA	-0.6418638275911781	-0.4692614353969097	yes
chr4	139211958	139212678	NA	NA	-0.43662375621084376	-0.2812206329118202	yes
chr4	139813233	139814240	NA	NA	-0.4373741263440608	-0.3337821626452697	yes
chr4	140813962	140815122	NA	NA	-0.44792282512709053	-0.1509332564587226	no
chr4	140868392	140869409	NA	NA	-0.5762346405401866	-0.2510946927921717	yes
chr4	140925612	140926283	NA	NA	-0.5368783022692037	-0.33285391186571855	yes
chr4	141158951	141159938	NA	NA	-0.3951673025221441	-0.27518666938627234	no
chr4	141477369	141478246	NA	NA	-0.3457905085257667	-0.24011035240821155	yes
chr4	141583821	141584566	NA	NA	-0.41475333218645893	-0.2395794134196939	yes
chr4	141858426	141859205	NA	NA	1.00778e+16	0.46128621700541306	yes
chr4	148069599	148070278	NA	NA	-0.5817098539091321	-0.3628775149947562	yes
chr4	150193878	150194309	NA	NA	-0.9620609979185165	-0.36304979669336596	no
chr4	150508746	150509673	NA	NA	-0.44689813057559036	-0.2638935522895154	no
chr4	150874349	150874950	NA	NA	-0.9199264900960269	-0.4115580856467962	yes
chr4	152107504	152108244	NA	NA	0.845863087629275	0.5117002355954711	yes
chr4	152204651	152205538	NA	NA	-0.5422276265358034	-0.31002896567180344	yes
chr4	156076857	156078366	NA	NA	-0.2573681101323914	-0.17347499621953527	yes
chr5	4530352	4530947	NA	NA	1.0985e+16	1.1166e+16	yes
chr5	21384752	21385458	NA	NA	-0.6047269296714943	-0.4920820262135031	yes
chr5	23674709	23676560	NA	NA	0.24324915703444547	0.18877046724700097	no
chr5	31288215	31288890	NA	NA	-0.32347326947824195	-0.22216863767031494	yes
chr5	34232621	34233490	NA	NA	-0.4990396784205556	-0.5496838765174977	yes
chr5	34235913	34236444	NA	NA	-0.38440742092605157	-0.2769756569827237	no
chr5	52633839	52635050	NA	NA	0.43773503975976685	0.36982848674712604	yes
chr5	52910123	52910742	NA	NA	0.598926272998899	0.7307164175178589	yes
chr5	62574354	62574894	NA	NA	0.7640825393533568	0.5468867937048985	yes
chr5	65780957	65782964	NA	NA	-0.3723045913870001	-0.32359913124073847	yes
chr5	72201715	72202392	NA	NA	-0.30515666041958844	-0.21632358764832538	no
chr5	75023818	75025167	NA	NA	-0.3086051927177286	-0.20852730082690027	yes
chr5	77013014	77013591	NA	NA	0.5123941196547976	0.4897171859630218	yes
chr5	92511313	92511716	NA	NA	-0.45813553481160796	-0.3916265765576412	yes
chr5	97935015	97935990	NA	NA	1138724329480110	0.45297476009003484	yes
chr5	99333823	99334342	NA	NA	-0.4309787091284849	-0.4674009197844548	yes
chr5	103778498	103780461	NA	NA	-0.4237996038169377	-0.2649450227064855	yes
chr5	105614731	105615248	NA	NA	-0.6324491145355751	-0.33325674422083795	no
chr5	105636539	105637377	NA	NA	-0.4746310060055033	-0.30448465629606464	yes
chr5	106574104	106575456	NA	NA	0.3715445286081501	0.28493378977655515	no
chr5	110362942	110364368	NA	NA	0.2587532920075426	0.2568602049250337	no
chr5	110960852	110961382	NA	NA	-0.4882865717701063	-0.37131914193368243	no
chr5	110969875	110971003	NA	NA	-0.2796330518209859	-0.32991716927890574	no
chr5	111049209	111050432	NA	NA	-0.34948279601209076	-0.2652514217562899	no
chr5	111140915	111142168	NA	NA	-0.23651270543567707	-0.23692939781558175	yes
chr5	111519186	111520176	NA	NA	-0.4863294993682335	-0.27430456643302736	yes
chr5	112091111	112092516	NA	NA	-1634078484871310	-0.47161712932679495	yes
chr5	112093656	112094426	NA	NA	-1.80976e+16	-0.5111713304592049	yes
chr5	112120961	112122265	NA	NA	-1.40386e+16	-0.7182621545880348	yes
chr5	112153576	112154182	NA	NA	-0.6965523577400932	-0.390314424929885	yes
chr5	112240618	112242866	NA	NA	-0.3650771230021748	-0.24773590692479164	yes
chr5	112972133	112972794	NA	NA	-1.21259e+16	-0.4743567704087969	yes
chr5	113007078	113007457	NA	NA	-0.9041884773288384	-0.6308959046032382	yes
chr5	114360879	114361396	NA	NA	-0.6288048165169502	-0.29829744581147416	no
chr5	114374544	114375228	NA	NA	-0.5531740778260438	-0.2899420836627209	no
chr5	115155922	115156118	NA	NA	-0.24683775010779316	-0.26572825437819425	no
chr5	120696471	120697364	NA	NA	-0.32862410541724674	-0.25964428982394877	no
chr5	120704265	120705256	NA	NA	-0.3130192092335149	-0.2357791788654075	no
chr5	122274543	122275404	NA	NA	-0.2737237855279112	-0.2936174966008137	yes
chr5	122310757	122312117	NA	NA	-0.6823126140504007	-0.45641896121545894	yes
chr5	122314670	122315536	NA	NA	-0.4301365759417749	-0.20961969640504224	no
chr5	122969955	122970454	NA	NA	-0.653505926570672	-0.3429488695734676	yes
chr5	124074633	124076206	NA	NA	-0.3477145984173304	-0.38062832474394626	yes
chr5	125010996	125011817	NA	NA	0.45891450593122574	0.40704587814977317	no
chr5	139285267	139286369	NA	NA	-0.4944376948072795	-0.45136960771365564	yes
chr5	139365924	139366271	NA	NA	-0.5743492506564565	-0.37691529028460646	yes
chr5	140513906	140514535	NA	NA	-0.5846984423664175	-0.3261807334922604	yes
chr5	140764945	140765966	NA	NA	-0.6644822852807046	-0.37874412763781307	yes
chr5	141014019	141014715	NA	NA	-0.37685658372612324	-0.2599490440897498	yes
chr5	143000224	143001272	NA	NA	-0.8246620002894921	-0.47476434120755145	yes
chr5	144181044	144181920	NA	NA	-0.2514152567731857	-0.23337719850248417	no
chr5	146657138	146657506	NA	NA	-0.5860024449772824	-0.33980791004046274	yes
chr5	150155485	150156464	NA	NA	-0.33652900719669315	-0.21589704011310581	no
chr5	150599560	150599793	NA	NA	-0.8689510423432679	-0.4024037043272355	yes
chr6	5110150	5110853	NA	NA	0.4602299778234859	0.308432274730834	yes
chr6	13024687	13025948	NA	NA	0.689544650981376	0.7124478855092241	yes
chr6	13060610	13062633	NA	NA	0.37694346552053165	0.34230629937537205	yes
chr6	13695093	13695865	NA	NA	-0.5831307646750014	-0.5067018174257618	yes
chr6	34292582	34293438	NA	NA	0.45369375000642426	0.30361216902669064	yes
chr6	37842624	37843778	NA	NA	-0.27572968971684075	-0.32151963355804397	yes
chr6	38710182	38711058	NA	NA	-0.5465238582906345	-0.34152887350628586	yes
chr6	38713527	38714499	NA	NA	-0.63400750136184	-0.362779180515612	yes
chr6	39230412	39231188	NA	NA	-0.41353426950598715	-0.217453604129184	no
chr6	39526755	39528223	NA	NA	-0.38728397203700327	-0.3901482925474116	no
chr6	48686924	48687707	NA	NA	-0.3291684307823051	-0.2481660020539147	no
chr6	48711455	48712899	NA	NA	-0.398884369725606	-0.2840566403273531	yes
chr6	51612200	51613218	NA	NA	0.47109967386215484	0.34196098099067934	no
chr6	52477069	52478355	NA	NA	-0.31188485436062297	-0.2572221465331786	yes
chr6	54056886	54057919	NA	NA	-0.5708591425094283	-0.4292408684090104	yes
chr6	54126456	54127941	NA	NA	-0.5385674258741899	-0.3265528828282098	yes
chr6	54142861	54144784	NA	NA	-0.3483343222962761	-0.28017618467679434	yes
chr6	57795652	57796998	NA	NA	0.6456359512876532	0.4403157513552275	yes
chr6	58998602	58999796	NA	NA	0.31473461933744273	0.23896048070252793	yes
chr6	66987501	66988191	NA	NA	0.5704718953596459	0.5977202927446258	yes
chr6	67531119	67533490	NA	NA	0.40281336213256647	0.24660468278458214	yes
chr6	71929864	71931583	NA	NA	-0.3313922182543518	-0.21146658531752296	yes
chr6	83006157	83006655	NA	NA	-0.6074415825327951	-0.5270590560422512	yes
chr6	83010027	83010532	NA	NA	-0.5815265995962134	-0.3966362264988126	yes
chr6	83011369	83012270	NA	NA	-0.8501741651511256	-0.3968425250708189	yes
chr6	83013320	83014037	NA	NA	-0.4110390610288179	-0.2712278497769072	yes
chr6	87130699	87130931	NA	NA	-0.6692500924121617	-0.6095323210183916	no
chr6	88757854	88758695	NA	NA	-0.5497770533518974	-0.40513911510336587	yes
chr6	88886189	88886994	NA	NA	0.6425179166487339	0.5908109359143393	yes
chr6	94517772	94518958	NA	NA	-0.29328270725794275	-0.40898722225622763	yes
chr6	95601824	95602379	NA	NA	0.6177474643468039	0.4039947761799741	no
chr6	99357854	99359620	NA	NA	-0.24317511789397958	-0.2801573122281255	no
chr6	99439933	99440729	NA	NA	-0.48040428640216115	-0.5294270684342562	yes
chr6	106792605	106794693	NA	NA	-0.5235337135661483	-0.6154221115991291	yes
chr6	115886796	115887290	NA	NA	-0.5904072543943749	-0.4489518825885349	no
chr6	115906656	115907494	NA	NA	-0.6658021573573887	-0.3144590542455493	yes
chr6	115908584	115910438	NA	NA	-0.3248989196996969	-0.2958716934090133	no
chr6	115986314	115987845	NA	NA	-0.25886458692693937	-0.3049492144561113	no
chr6	116003471	116004341	NA	NA	-0.5631393837538666	-0.40006082378751573	yes
chr6	118166533	118167574	NA	NA	0.6567208811982426	0.43115705400588467	yes
chr6	121225810	121227454	NA	NA	-0.4757647705178816	-0.29519505410865615	yes
chr6	129607840	129609356	NA	NA	0.501622230204222	0.3852771752042498	yes
chr6	131352648	131354828	NA	NA	0.3786876684553972	0.26716539531049666	yes
chr6	131433572	131434065	NA	NA	0.7878516707735562	0.6665425859280214	yes
chr6	140815841	140816176	NA	NA	-0.7602358156961807	-0.7656760217721884	yes
chr6	149565558	149566776	NA	NA	0.6375722021225101	0.4195270570423944	yes
chr7	3940254	3941503	NA	NA	-0.448215554389228	-0.4811319251079872	yes
chr7	12780062	12781230	NA	NA	0.5770518969939928	0.5994204736137486	yes
chr7	12803112	12804314	NA	NA	0.43082504798992927	0.4550436396888244	yes
chr7	24617707	24618812	NA	NA	-0.6650877444855418	-0.24124949788212618	yes
chr7	25209320	25209836	NA	NA	-0.6670063465618388	-0.2783839465246264	yes
chr7	28792543	28792961	NA	NA	-0.4717389008208488	-0.3084991393726275	yes
chr7	29008650	29009279	NA	NA	-0.39473479205240514	-0.3106471694239624	no
chr7	30829443	30830327	NA	NA	-0.7648402803655993	-0.39396603382415846	no
chr7	34984510	34986069	NA	NA	0.3903734483046737	0.3280845199051873	yes
chr7	42979583	42980876	NA	NA	-0.2624211195122332	-0.48071564833731634	no
chr7	48137134	48138873	NA	NA	0.5002864512400897	0.14990920116018808	no
chr7	49342565	49343732	NA	NA	-0.7462935148210321	-0.41843436849221405	yes
chr7	66124461	66125594	NA	NA	-0.2616440864258292	-0.2036891187733444	yes
chr7	67429226	67430640	NA	NA	-0.36575834369337784	-0.24504507992165137	no
chr7	67451102	67452024	NA	NA	-0.4016301999792476	-0.25148406988719335	no
chr7	67973109	67973857	NA	NA	0.5572286961320013	0.5497723411344851	yes
chr7	73399405	73400187	NA	NA	0.5650691203958963	0.4613807294471739	yes
chr7	75648917	75649558	NA	NA	-0.7051371280040895	-0.3438235185641286	yes
chr7	75909884	75910879	NA	NA	0.43537766373029235	0.29966057906816673	yes
chr7	80177379	80177722	NA	NA	-0.47508438059591157	-0.4038658557378626	yes
chr7	80652145	80653364	NA	NA	-0.39131378830255836	-0.2363534482387575	no
chr7	82017020	82018608	NA	NA	0.5308686844613285	0.39885081442850406	yes
chr7	88228866	88231547	NA	NA	-0.2581954156047976	-0.19817791135798712	no
chr7	96476920	96477956	NA	NA	-0.3695732478968998	-0.3382297532017079	yes
chr7	96482487	96483836	NA	NA	-0.6413284877336174	-0.3633452632383849	yes
chr7	96658100	96658934	NA	NA	-0.5931608721646126	-0.38134857155513274	yes
chr7	96706391	96707429	NA	NA	-0.8520709494778342	-0.5117823587248576	yes
chr7	96724075	96724865	NA	NA	-0.5281052984130981	-0.40377279386259074	no
chr7	96730013	96730946	NA	NA	-0.5523470887153933	-0.2886117231883587	yes
chr7	96734650	96735433	NA	NA	-0.48569332743776267	-0.35018866891204187	yes
chr7	96753874	96754712	NA	NA	-0.6383192629396022	-0.7807434124336665	yes
chr7	99548013	99548353	NA	NA	-1.18782e+16	-0.4366185145014379	yes
chr7	101066352	101067898	NA	NA	-0.3926925546321301	-0.3906390414786401	yes
chr7	101071137	101071364	NA	NA	-0.6766652415912581	-0.684117849150938	yes
chr7	109358754	109359114	NA	NA	-0.9396658471988458	-0.5862151588501204	yes
chr7	109561616	109563030	NA	NA	-0.3628241490310838	-0.46174159564661	yes
chr7	114947518	114948371	NA	NA	-0.41795556560442076	-0.32527562664501586	yes
chr7	116701354	116702360	NA	NA	0.6474612025676506	0.30961222248115783	yes
chr7	117127376	117128296	NA	NA	0.6200288161243716	0.38579205090162877	yes
chr7	118275011	118275557	NA	NA	-0.3774159853242309	-0.36001465615090367	yes
chr7	122813745	122814348	NA	NA	-0.6076074474476615	-0.5588917324283467	yes
chr7	125920323	125921543	NA	NA	-0.39631353887511234	-0.20412044873387658	no
chr7	127076869	127077373	NA	NA	-0.5759084109674293	-0.330028507351096	yes
chr7	127079851	127080645	NA	NA	-0.4161969764562191	-0.21057813116645493	no
chr7	128048502	128049445	NA	NA	-0.2424767068641609	-0.2030512777234305	no
chr7	128056886	128057554	NA	NA	-0.43828166263643464	-0.33739973822364616	no
chr7	128193041	128193631	NA	NA	-0.5269853258068931	-0.3322771849861725	no
chr7	128381935	128382944	NA	NA	-0.6053361452644102	-0.32755078445563474	yes
chr7	132332896	132333736	NA	NA	-0.43336746875913157	-0.3464601623060417	yes
chr7	132717425	132717759	NA	NA	-0.5717795921019599	-0.40514503313748146	yes
chr7	132728916	132729893	NA	NA	-0.3518377165946461	-0.20986477727585742	no
chr7	133432177	133432860	NA	NA	-0.6671841011026274	-0.6272338284641704	yes
chr7	134586881	134587637	NA	NA	-0.6617655364949181	-0.480782199582761	yes
chr7	136871797	136872502	NA	NA	0.6555570535236268	0.6923950541451639	yes
chr7	136938092	136938891	NA	NA	0.6821752369749214	0.47448970904820487	no
chr7	141371890	141372719	NA	NA	-0.7622704550275203	-0.3705920140811166	yes
chr7	143021519	143022041	NA	NA	-0.4257723819507608	-0.3213611808042194	yes
chr8	11112125	11113738	NA	NA	-0.3255289410702808	-0.20241876842082202	yes
chr8	11138121	11139487	NA	NA	-0.398398529270723	-0.3369512204990184	yes
chr8	11180836	11182845	NA	NA	-0.42780588147254556	-0.19707684588828864	no
chr8	11463368	11464789	NA	NA	-0.5518062672837452	-0.3958170173359446	yes
chr8	34755487	34757057	NA	NA	-0.5333190225517334	-0.3489765820563573	yes
chr8	36346678	36347390	NA	NA	0.4356360888039536	0.338366030334965	no
chr8	46496925	46498421	NA	NA	-0.6098901450997773	-0.29939445078399285	yes
chr8	47172698	47174534	NA	NA	0.5601133573636958	0.25120285350484683	no
chr8	56617106	56617768	NA	NA	0.513348121517525	0.37375415086483604	no
chr8	57799690	57800759	NA	NA	0.3420648538916591	0.19670342003930935	yes
chr8	61358947	61360758	NA	NA	0.32251194200446215	0.28541078154866045	yes
chr8	70682206	70683218	NA	NA	-0.6376474103749507	-0.34636009143822416	no
chr8	71296034	71297128	NA	NA	-0.37862105500823495	-0.2916082389181634	no
chr8	71624991	71625497	NA	NA	-0.3516996869976764	-0.27181858320634367	yes
chr8	76993455	76994085	NA	NA	1.16101e+16	0.6148202989691455	yes
chr8	79209592	79210418	NA	NA	0.6029695364950042	0.7227283986794485	yes
chr8	80981298	80982380	NA	NA	-0.23817279067995853	-0.23297138028288422	no
chr8	81614275	81615818	NA	NA	0.42789806625619276	0.32081918738626053	yes
chr8	82304223	82304891	NA	NA	1.22001e+16	1021928146008730	yes
chr8	83089334	83090861	NA	NA	-0.3159484255151077	-0.2859848655472669	yes
chr8	83102862	83104406	NA	NA	-0.3698838753313668	-0.2996379971894672	no
chr8	87689502	87691102	NA	NA	-0.8135990711753714	-0.45522079264922405	no
chr8	90832949	90833242	NA	NA	-0.795710503716888	-0.37648090033273257	yes
chr8	94733580	94734539	NA	NA	0.5740436495621672	0.36639584592155805	no
chr8	110911696	110912573	NA	NA	-0.49703677122338497	-0.35287715210577236	yes
chr8	114663125	114663397	NA	NA	1.24601e+16	0.5502639784380149	yes
chr8	115228716	115229425	NA	NA	0.6068530149209501	0.5414043053478133	yes
chr8	119412216	119413263	NA	NA	-0.27172460271955223	-0.2955172393407672	no
chr8	119416817	119417026	NA	NA	-0.6340251241252418	-0.4901432753992853	yes
chr8	120545825	120546286	NA	NA	-0.7049573393737569	-0.40449059722223296	no
chr8	122469946	122470502	NA	NA	-0.7317711313508249	-0.4191052998653527	no
chr8	123282807	123284629	NA	NA	-0.2922232682162521	-0.22814292913524759	no
chr8	124265522	124266324	NA	NA	-0.45758051790890786	-0.3477169163176721	no
chr8	124368034	124368482	NA	NA	0.7022109255906271	0.5759974510723579	yes
chr8	124699621	124699987	NA	NA	-0.9829707208780789	-0.5315459260967499	yes
chr8	128103180	128103933	NA	NA	-0.6404431096982535	-0.3041739842941876	no
chr9	7220954	7222218	NA	NA	0.5931156593848365	0.3197882494156451	no
chr9	15493045	15494520	NA	NA	0.5235571883414532	0.37982761378486857	yes
chr9	15685173	15685676	NA	NA	0.7866877350508051	0.5184516101647291	yes
chr9	25591782	25592696	NA	NA	0.39806821801910675	0.2590570419814476	no
chr9	31925682	31926484	NA	NA	0.7509776590390991	0.4355383589721518	yes
chr9	32564472	32564821	NA	NA	-0.6085715166994251	-0.6038990328098784	no
chr9	32815468	32815994	NA	NA	0.5096531943452232	0.5024141939037957	no
chr9	32960537	32961334	NA	NA	-0.5885146050953362	-0.3702154674942292	yes
chr9	40576981	40577924	NA	NA	-0.6577844382651407	-0.41251873818691104	yes
chr9	41434007	41435071	NA	NA	-0.7682399004903897	-0.3328699850479543	no
chr9	55395420	55396203	NA	NA	-0.42630467379596854	-0.4212665148315432	no
chr9	56097699	56098304	NA	NA	-0.4085133871213672	-0.23623333389636372	yes
chr9	56099928	56100831	NA	NA	-0.4765141540336109	-0.39498794223848926	yes
chr9	56103850	56104766	NA	NA	-0.33721243575724924	-0.3660262241049393	yes
chr9	57943065	57943763	NA	NA	-0.503820029392408	-0.39871280860106206	yes
chr9	57977779	57978540	NA	NA	-0.7862858381278869	-0.5348574653184642	yes
chr9	57980402	57980936	NA	NA	-0.9055691260209223	-0.4635136082269161	yes
chr9	57987713	57988740	NA	NA	-0.532688730992878	-0.4417065155364752	yes
chr9	59969392	59970017	NA	NA	0.6213226672938515	0.43004906942879506	yes
chr9	61965111	61966204	NA	NA	-0.2705007626733349	-0.16981757395731778	no
chr9	62420898	62421679	NA	NA	0.5477846264101096	0.5529744814312788	yes
chr9	63732411	63733050	NA	NA	-0.6284443485068157	-0.3773824905695711	yes
chr9	66211871	66212797	NA	NA	-0.4220560501656118	-0.38523731818450097	no
chr9	66294777	66295461	NA	NA	-0.4798452844910405	-0.4643729196609743	yes
chr9	66679957	66680790	NA	NA	-0.6065795141854285	-0.32276414968144107	yes
chr9	66682594	66683435	NA	NA	-0.3428218292424664	-0.23769755784113614	yes
chr9	71027365	71028238	NA	NA	-0.3033196605569741	-0.3891254821980647	no
chr9	75313639	75314935	NA	NA	0.23368335195479323	0.22534109745888684	no
chr9	76023290	76025215	NA	NA	0.40588262837190864	0.39655672931212255	no
chr9	76063871	76064980	NA	NA	0.4321208375201393	0.3437380235096503	yes
chr9	76230476	76230985	NA	NA	0.7968766724091453	0.4409492336786154	yes
chr9	76235984	76237084	NA	NA	0.6510716092063911	0.432150702222335	yes
chr9	76361330	76362963	NA	NA	0.5833588306815207	0.7470946171705914	yes
chr9	76660653	76661285	NA	NA	0.6781652973363365	0.4683528107584493	yes
chr9	77655026	77656468	NA	NA	0.29859947699232475	0.1435403556428018	no
chr9	78022056	78022702	NA	NA	0.880359123614166	0.4515800753693808	no
chr9	80341636	80343013	NA	NA	1.05222e+16	0.4573964725337303	yes
chr9	81308392	81309410	NA	NA	1.79466e+16	0.7122984562875783	yes
chr9	83728424	83728965	NA	NA	0.4882821061727895	0.43540758551770226	no
chr9	88599120	88600095	NA	NA	0.3379368343799013	0.37752774879689494	yes
chr9	88735211	88735968	NA	NA	-0.2889814885241966	-0.21427964921669707	no
chr9	103180535	103181645	NA	NA	0.40907678230536726	0.23924267296771326	yes
chr9	107526373	107527252	NA	NA	0.32790642751539445	0.2805129886933574	no
chr9	109199166	109200783	NA	NA	-0.663101052363602	-0.31599441944608764	yes
chr9	118082500	118083274	NA	NA	0.7211433051271583	0.4492241917953987	yes
chr9	118669389	118670236	NA	NA	-0.4084225753952407	-0.4631327254829984	no
chr9	118724563	118725444	NA	NA	-0.512474029221231	-0.21773084573347654	no
chr9	118725920	118726970	NA	NA	-0.35397397238475004	-0.2716089377380845	yes
chr9	119743654	119744620	NA	NA	-0.45401238004173683	-0.2773323709202126	yes
chr9	119969901	119971018	NA	NA	-0.28029782298513006	-0.22696617835663543	no
chr9	120190917	120191832	NA	NA	0.42513321514994395	0.5769873351992169	no
chr9	121880667	121881550	NA	NA	-0.3232567522182994	-0.25520168134963594	yes
chr9	121903297	121905294	NA	NA	-0.31427028373608423	-0.2944118522132894	no
chr9	121918808	121919805	NA	NA	-0.3540929976154615	-0.2519990459990865	yes
chr9	123984726	123985381	NA	NA	-0.4464718887858938	-0.32539649491681016	no
chrX	19237038	19238399	NA	NA	0.6731511065738478	0.5229439226639547	yes
chrX	50580113	50580851	NA	NA	0.5311506546926614	0.43308516379446	yes
chrX	93296425	93297846	NA	NA	0.43663528677497687	0.4000512451646829	yes
chrX	93889202	93890354	NA	NA	0.30664922374319326	0.20313905030613405	no
chrX	95711344	95712514	NA	NA	0.4564488783920518	0.3076221166562061	yes
chrX	134570401	134570787	NA	NA	-0.4674294539912236	-0.4073369658513806	no
chrX	135564778	135565500	NA	NA	0.6617266642431472	0.37518849309363317	yes
chrX	152973546	152974771	NA	NA	0.5196417183924678	0.48982635924429746	yes
