# Supplementary material for: Leveraging the Mendelian disorders of the epigenetic machinery to systematically map functional epigenetic variation
Source: eLife journal article supplement (doi:10.7554/elife.65884), 2021-08-31
Supplement: supp [file elife-65884-supp-v1.zip › elife_poa_e65884_Figure_2_source_data_4.xlsx]

## Sheet: Figure_2_Supp_Table_4
chr	start	end	prom_overlapping_id	prom_overlapping_name	logFC_KS1	logFC_KS2	logFC_RT	significant_at_FDR_05
chr1	23255892	23257072	NA	NA	0.8246580713713535	0.46514156281968155	105817457632607	yes
chr1	33882982	33884068	NA	NA	0.5018327823838491	0.28752403163277646	0.5837925605920602	yes
chr1	38904315	38905448	NA	NA	-0.8425202008945057	-0.4465179224708618	-0.5456240127928998	yes
chr1	42713100	42714970	NA	NA	0.7995958691284505	0.41300554142480994	0.4811010740064941	yes
chr1	61135537	61136102	NA	NA	0.9330707435316115	0.4558483323064509	0.7266276760738789	no
chr1	75486696	75488310	NA	NA	0.4978722250168124	0.29509172907259906	0.4305656792404547	yes
chr1	85988119	85989371	NA	NA	-0.8522385646258639	-0.7627182688322276	-0.9577326955106166	yes
chr1	94034719	94036063	NA	NA	0.5910127462041509	0.36596498313010195	0.26000428928568103	no
chr1	126817425	126818369	NA	NA	0.6840835361139823	0.3463782424340663	0.6317905752592646	yes
chr1	131145955	131146820	NA	NA	-0.22746721766268896	-0.17990641217378314	-0.2675853421973277	no
chr1	131700231	131700890	NA	NA	-0.4472602742517145	-0.22411379082415275	-0.32460742913485513	no
chr1	139346149	139347339	NA	NA	1.0141e+16	0.625977072294295	1225795163303280	yes
chr1	165322005	165323383	NA	NA	0.5181509215220386	0.3441922025039229	0.6616983849536847	no
chr1	178924398	178925011	NA	NA	0.7623119685329456	1.00038e+16	1.47122e+16	no
chr10	7390414	7393576	NA	NA	0.6787154638374452	0.438408163978235	0.6661614983127654	yes
chr10	11309807	11310285	NA	NA	0.7161304254126603	0.6678069653445181	1.29983e+16	yes
chr10	18318256	18319596	NA	NA	0.9488223715780731	0.5807231344611478	0.8097479355046671	yes
chr10	18430258	18431277	NA	NA	0.5755476156850873	0.38264606837256504	0.9507225810133847	no
chr10	18526848	18528841	NA	NA	0.5729560788300115	0.3048329300473294	0.5270862942510558	yes
chr10	50910293	50911305	NA	NA	0.8891885957200014	0.44431108412424547	1016419150781630	yes
chr10	56368987	56369584	NA	NA	1.19039e+16	0.7242552098644072	0.805244236737251	no
chr10	76798687	76799673	NA	NA	0.47788671161471447	0.4032724357654411	0.4698859397552296	no
chr10	84554045	84555030	NA	NA	-0.31961014763429213	-0.18891627098734579	-0.33368156534663235	no
chr10	94426067	94426967	NA	NA	0.40478459847228243	0.2253142742276197	0.6024007668408571	no
chr10	127135147	127136000	NA	NA	-0.5324473905910334	-0.19716510438645865	-0.3227105807182746	no
chr11	18874965	18878423	NA	NA	0.35878727387167053	0.37264160291855675	0.3884010306307145	yes
chr11	29685765	29686777	NA	NA	-0.3942693183840878	-0.3495797174602584	-0.46588888709381	yes
chr11	29931821	29932403	NA	NA	0.8093880595387732	0.597153797615717	0.8386459265751667	yes
chr11	44685769	44686664	NA	NA	-0.3562634218715904	-0.2530532191775933	-0.6143122111506986	yes
chr11	50473604	50474540	NA	NA	-0.4991895634763361	-0.5375693340817922	-0.44638501531361746	no
chr11	83572011	83572823	NA	NA	-0.30837352392601114	-0.21315723048969165	-0.6276425863644403	no
chr11	83595490	83596374	NA	NA	-0.6043185823859988	-0.309080239703104	-0.40980714119318923	no
chr11	94589500	94589869	NA	NA	-0.5733866912759424	-0.341493546079729	-0.5441248064056191	yes
chr11	95869704	95870854	NA	NA	-0.24673585443895177	-0.29937931051124206	-0.3187860585754808	no
chr11	117476703	117477154	NA	NA	-1165600154027670	-0.4805032074906547	-1.12474e+16	yes
chr12	25319587	25320430	NA	NA	-0.5808682811953672	-0.4138122033280179	-0.650261340119407	yes
chr12	73052166	73054346	NA	NA	0.3980004048393188	0.49793104303198243	0.7701138013536452	no
chr12	79017840	79018562	NA	NA	-0.3760171718307086	-0.29938719756308135	-0.5158864360786819	yes
chr12	86046028	86048086	NA	NA	-0.468955816000853	-0.4337497099671741	-0.6168225219645085	yes
chr12	91668310	91669155	NA	NA	0.7279994632806679	0.6263301559278768	0.6741660772324932	yes
chr12	91802813	91803965	NA	NA	0.3787368889242262	0.362000485328699	0.5265385502030222	no
chr12	102301893	102303176	NA	NA	-0.34743673948516657	-0.23402965075269733	-0.2510510855385975	no
chr12	111794004	111795320	NA	NA	0.6998044736971286	0.358128871741243	1.54906e+16	yes
chr13	13537224	13538123	NA	NA	-0.6413646659682947	-0.5897016940742701	-0.5205375789266378	no
chr13	17626897	17627685	NA	NA	0.634496605867551	0.3975614912848845	0.6771456466566096	yes
chr13	21233695	21234665	NA	NA	0.48564355063073655	0.44964423577152585	0.4372682940520227	no
chr13	42828823	42829718	NA	NA	0.6309350386409452	0.41321074118601747	0.7382752201180056	no
chr13	56615723	56616820	NA	NA	-0.5287190677925298	-0.37172291362498505	-0.5053418652936882	yes
chr13	74259567	74260920	NA	NA	0.8833777473384943	0.5218387090901527	0.9848671388817901	yes
chr13	84347444	84349574	NA	NA	0.7704969945049508	0.351488361824118	0.5667709351164711	yes
chr13	92738547	92739512	NA	NA	0.4098048935459068	0.302107988320136	0.49939979044212435	yes
chr13	92940406	92941120	NA	NA	0.5604627853144374	0.41478418090871444	0.6578788223042774	yes
chr13	96983113	96984367	NA	NA	0.5962603719692827	0.3625654227426689	0.62596031125943985	yes
chr13	102760867	102761639	NA	NA	0.6264839069400768	0.4461885066812954	1032181357159690	yes
chr14	6755994	6757659	NA	NA	0.786796171588968	0.39105332472822546	1.15362e+16	yes
chr14	7658347	7659162	NA	NA	0.7166499195118837	0.5972957087623806	1.20372e+16	yes
chr14	16008186	16010557	NA	NA	-0.44676020322554344	-0.28684111554738556	-0.2769739016955698	no
chr14	20173422	20174483	NA	NA	-0.3906456608100521	-0.23153739953753397	-0.23524795469026744	no
chr14	21993622	21994413	NA	NA	1.02484e+16	0.630464172517046	0.6195625124143708	yes
chr14	76582353	76582925	NA	NA	-0.48589674605907274	-0.35786527869629603	-0.756900535512441	no
chr14	118231043	118232084	NA	NA	0.5703645417541262	0.3699600783040499	0.5904825419853642	yes
chr15	38709628	38710750	NA	NA	0.8208055235730936	0.4533482180523817	0.6229680867491831	yes
chr15	44748185	44748860	NA	NA	0.6956308743919571	0.6894058355238571	1369644801705910	no
chr15	73137212	73137994	NA	NA	-0.3935688061483755	-0.27841627531520735	-0.31931410786568365	yes
chr15	76765738	76766081	NA	NA	-0.6591966185082919	-0.42756365940520963	-0.5502687038812512	yes
chr15	78591579	78592254	NA	NA	-0.4774536482298389	-0.26826435603680215	-0.3863586042361861	yes
chr15	88489901	88491176	NA	NA	-0.4351702055231189	-0.35700045304132033	-0.7658414742419899	yes
chr16	18589857	18591055	NA	NA	0.39213094696258227	0.3245575273048212	0.6419007356678226	no
chr16	21845833	21846551	NA	NA	0.5281283592835767	0.6476283204670169	0.8671984451618241	yes
chr16	42189857	42190983	NA	NA	0.5649482563241524	0.2473719187818921	0.3019754049983394	yes
chr16	95359786	95361043	NA	NA	-0.4264278340861199	-0.32936139078476456	-0.5918130985151171	yes
chr17	8197583	8198026	NA	NA	-0.312147057485535	-0.2261835705640348	-0.3710708866528787	yes
chr17	8223348	8223765	NA	NA	-0.8690345986220612	-0.31583000629814717	-0.5967408620091639	yes
chr17	16891202	16892118	NA	NA	-1.034e+16	-0.591737687586277	-0.616492161552591	yes
chr17	17633726	17634823	NA	NA	-0.40566851213202215	-0.3685222720941986	-0.480275823589311	yes
chr17	22080696	22081608	NA	NA	0.7883224495399388	0.5168278975916395	0.5823593450499892	yes
chr17	32895281	32895848	NA	NA	-0.47416270255597553	-0.2784514669306804	-0.6924692563571265	yes
chr17	81668559	81670664	NA	NA	0.7553870284466109	0.4033373208362699	0.49611346211238266	yes
chr18	7404846	7405631	NA	NA	0.8512836144966713	0.4649495896610022	1.04041e+16	yes
chr18	20696593	20697730	NA	NA	-0.43333289618800835	-0.3014509386899555	-0.3650671171240691	yes
chr18	24852198	24852938	NA	NA	0.7827568681923103	0.36232501810276696	0.9646800284646847	yes
chr18	24872061	24872580	NA	NA	0.8852791293751276	0.45144495241298627	0.8082157696660769	no
chr18	62726486	62727331	NA	NA	-0.47414075573919334	-0.33716073306462163	-0.6295431814953436	yes
chr18	69498342	69499965	NA	NA	0.48863378564522214	0.23595215987737048	0.5097145555763809	yes
chr18	77869709	77870466	NA	NA	0.7847264280913696	0.47460720976317006	0.7779175275161074	yes
chr19	7116174	7118578	NA	NA	-0.29290142788934365	-0.22519696061524141	-0.35314831338999003	yes
chr19	7226318	7227198	NA	NA	-0.5039789635960928	-0.31347110828083957	-0.3529494453683014	yes
chr19	23056587	23057969	NA	NA	0.684088802883643	0.42881821268677783	0.8111166884380189	yes
chr19	44314239	44315331	NA	NA	0.48754163454745264	0.28757695364481795	0.7023172999861982	yes
chr2	3910197	3910787	NA	NA	0.5636371123742511	0.5353076863620014	0.5459041375944913	no
chr2	30690102	30691486	NA	NA	-0.3766939873014484	-0.35807055424466366	-0.27039414184234367	yes
chr2	31455193	31455823	NA	NA	-0.8359419763536861	-0.30238633469723586	-0.8119242749804471	yes
chr2	31459091	31460714	NA	NA	-0.4112459207310487	-0.37359864519881486	-0.5243222495585887	no
chr2	44556813	44558252	NA	NA	0.7845579058762084	0.36166176782315484	0.601297621448383	yes
chr2	59521846	59522955	NA	NA	0.3982246513622577	0.3219981981739664	0.44241022596548235	no
chr2	91476107	91477230	NA	NA	1.05532e+16	0.5841652739111031	0.6655520750354361	yes
chr2	152991394	152992176	NA	NA	-0.9891966261508948	-0.5178433446325214	-0.8324492447401693	yes
chr2	164866500	164867393	NA	NA	-0.4690186009809668	-0.2734214092559555	-0.4863307064450984	yes
chr2	166401398	166402319	NA	NA	-0.7562189328013054	-0.45906374602217415	-0.36249286626533195	yes
chr3	15125496	15127149	NA	NA	-0.2786370470353634	-0.2333606168481994	-0.5460712290300187	no
chr3	96251667	96252512	NA	NA	-0.5214682770898678	-0.2420675752504517	-1.08764e+16	yes
chr3	121967483	121968304	NA	NA	0.5889580362041245	0.28447088817949456	0.8950798313343078	yes
chr3	148335865	148336765	NA	NA	0.6044801031768965	0.4400539721418425	0.5163612345437071	no
chr3	152105385	152105808	NA	NA	0.8385122213609894	0.5218517990949059	0.8102173786727074	no
chr3	152928399	152930721	NA	NA	-0.4742823959075673	-0.23486340268634934	-0.2874615103505985	no
chr4	3523639	3524588	NA	NA	-0.6724369026446178	-0.5485587791228989	-0.5574569085006666	yes
chr4	24966110	24967124	NA	NA	1.41329e+16	0.6968066077909495	0.8154235668400147	yes
chr4	42262265	42263202	NA	NA	0.621216103498023	0.47800340990800766	0.5324172684095797	yes
chr4	45948573	45950028	NA	NA	-0.2770381082668098	-0.2372941089692649	-0.2958780718887822	yes
chr4	67071082	67071692	NA	NA	1.17576e+16	0.6761758405894652	0.6912300478307404	no
chr4	106589934	106591287	NA	NA	0.7595790804378547	0.269119607333418	0.4751016851186679	yes
chr4	114651940	114653276	NA	NA	-0.3073920226753334	-0.19620206228033724	-0.2642340050870513	yes
chr4	117921015	117921957	NA	NA	-0.5246728940842715	-0.3288341429697928	-0.5208025347512705	yes
chr4	123014006	123014554	NA	NA	-0.4456367176318307	-0.32538025215729366	-0.5989763943904672	no
chr4	134967899	134968793	NA	NA	-0.4618329646198118	-0.39380689106778094	-0.45445984970175557	yes
chr4	139813233	139814240	NA	NA	-0.4373741263440608	-0.3337821626452697	-0.5867458996070275	yes
chr4	140813962	140815122	NA	NA	-0.44792282512709053	-0.1509332564587226	-0.3866911895643517	no
chr4	141583821	141584566	NA	NA	-0.41475333218645893	-0.2395794134196939	-0.6874940830259992	yes
chr4	152107504	152108244	NA	NA	0.845863087629275	0.5117002355954711	1444293214554790	yes
chr4	152204651	152205538	NA	NA	-0.5422276265358034	-0.31002896567180344	-0.6013755176924902	yes
chr5	75023818	75025167	NA	NA	-0.3086051927177286	-0.20852730082690027	-0.3663857480229538	yes
chr5	99333823	99334342	NA	NA	-0.4309787091284849	-0.4674009197844548	-0.4696353555486184	yes
chr5	110362942	110364368	NA	NA	0.2587532920075426	0.2568602049250337	0.4293658092808915	no
chr5	112091111	112092516	NA	NA	-1634078484871310	-0.47161712932679495	-0.7224038482549467	yes
chr5	112240618	112242866	NA	NA	-0.3650771230021748	-0.24773590692479164	-0.2973437103556861	yes
chr5	112972133	112972794	NA	NA	-1.21259e+16	-0.4743567704087969	-1.03668e+16	yes
chr5	120696471	120697364	NA	NA	-0.32862410541724674	-0.25964428982394877	-0.36340164037896416	no
chr5	125010996	125011817	NA	NA	0.45891450593122574	0.40704587814977317	113947468389666	no
chr6	51612200	51613218	NA	NA	0.47109967386215484	0.34196098099067934	0.48054202076382535	no
chr6	52477069	52478355	NA	NA	-0.31188485436062297	-0.2572221465331786	-0.43314697697538995	yes
chr6	67531119	67533490	NA	NA	0.40281336213256647	0.24660468278458214	0.3992495742610265	yes
chr6	83013320	83014037	NA	NA	-0.4110390610288179	-0.2712278497769072	-0.495879253107252	yes
chr6	88886189	88886994	NA	NA	0.6425179166487339	0.5908109359143393	1.334e+16	yes
chr6	149565558	149566776	NA	NA	0.6375722021225101	0.4195270570423944	0.7962487042179575	yes
chr7	3940254	3941503	NA	NA	-0.448215554389228	-0.4811319251079872	-0.3652382297214465	yes
chr7	48137134	48138873	NA	NA	0.5002864512400897	0.14990920116018808	0.3073708198719351	no
chr7	96706391	96707429	NA	NA	-0.8520709494778342	-0.5117823587248576	-1.00371e+16	yes
chr7	96730013	96730946	NA	NA	-0.5523470887153933	-0.2886117231883587	-0.49635464717599254	yes
chr7	96734650	96735433	NA	NA	-0.48569332743776267	-0.35018866891204187	-0.6077828953567583	yes
chr7	136871797	136872502	NA	NA	0.6555570535236268	0.6923950541451639	0.6301924882724004	yes
chr7	136938092	136938891	NA	NA	0.6821752369749214	0.47448970904820487	0.9748972203356278	no
chr8	11112125	11113738	NA	NA	-0.3255289410702808	-0.20241876842082202	-0.5709555684942565	yes
chr8	11138121	11139487	NA	NA	-0.398398529270723	-0.3369512204990184	-0.8982373888097881	yes
chr8	11180836	11182845	NA	NA	-0.42780588147254556	-0.19707684588828864	-0.7770327908822813	no
chr8	11463368	11464789	NA	NA	-0.5518062672837452	-0.3958170173359446	-0.4552748410248402	yes
chr8	76993455	76994085	NA	NA	1.16101e+16	0.6148202989691455	0.8185316011497278	yes
chr8	79209592	79210418	NA	NA	0.6029695364950042	0.7227283986794485	0.7132169172726702	yes
chr8	80981298	80982380	NA	NA	-0.23817279067995853	-0.23297138028288422	-0.2480091730384148	no
chr8	81614275	81615818	NA	NA	0.42789806625619276	0.32081918738626053	0.7746794666128978	yes
chr8	83089334	83090861	NA	NA	-0.3159484255151077	-0.2859848655472669	-0.2729986996614137	yes
chr8	94733580	94734539	NA	NA	0.5740436495621672	0.36639584592155805	0.8108978698049925	no
chr9	15493045	15494520	NA	NA	0.5235571883414532	0.37982761378486857	0.6778007053045997	yes
chr9	15685173	15685676	NA	NA	0.7866877350508051	0.5184516101647291	0.7638148448696108	yes
chr9	40576981	40577924	NA	NA	-0.6577844382651407	-0.41251873818691104	-0.601386672301112	yes
chr9	63732411	63733050	NA	NA	-0.6284443485068157	-0.3773824905695711	-0.6158480678035433	yes
chr9	66682594	66683435	NA	NA	-0.3428218292424664	-0.23769755784113614	-0.3393319569876309	yes
chr9	76361330	76362963	NA	NA	0.5833588306815207	0.7470946171705914	0.4098198351630316	yes
chr9	78022056	78022702	NA	NA	0.880359123614166	0.4515800753693808	0.668006909020721	no
chr9	80341636	80343013	NA	NA	1.05222e+16	0.4573964725337303	0.5072196748092573	yes
chr9	81308392	81309410	NA	NA	1.79466e+16	0.7122984562875783	1.33276e+16	yes
chr9	103180535	103181645	NA	NA	0.40907678230536726	0.23924267296771326	0.35904564667214767	yes
chr9	118724563	118725444	NA	NA	-0.512474029221231	-0.21773084573347654	-0.3792701966360284	no
chr9	119743654	119744620	NA	NA	-0.45401238004173683	-0.2773323709202126	-0.5368060644840922	yes
chr9	121918808	121919805	NA	NA	-0.3540929976154615	-0.2519990459990865	-0.3384770063987547	yes
chrX	19237038	19238399	NA	NA	0.6731511065738478	0.5229439226639547	0.5301367412440329	yes
chrX	95711344	95712514	NA	NA	0.4564488783920518	0.3076221166562061	0.4100512362207091	yes
chrX	152973546	152974771	NA	NA	0.5196417183924678	0.48982635924429746	1246198733256290	yes
