# Supplementary material for: Leveraging the Mendelian disorders of the epigenetic machinery to systematically map functional epigenetic variation
Source: eLife journal article supplement (doi:10.7554/elife.65884), 2021-08-31
Supplement: supp [file elife-65884-supp-v1.zip › elife_poa_e65884_Figure_2_source_data_5.xlsx]

## Sheet: KS1_ATAC_SVs
surrogate_variable_1
-0.26264
-0.351574
0.41821
-0.038837
0.147303
0.390861
-0.0291494
-0.20731
0.307905
0.0722128
-0.18149
0.370036
-0.13975
-0.154366
-0.0295559
-0.0679269
-0.282273
0.101532
-0.0631875

## Sheet: KS2_ATAC_SVs
surrogate_variable_1
-0.208643
-0.215948
-0.023672
-0.210039
-0.307293
-0.320953
0.452649
0.192963
0.438927
0.0144245
-0.147624
0.41307
0.133122
-0.0958237
-0.111944
0.0192127
-0.0224295

## Sheet: RT1_ATAC_SVs
surrogate_variable_1
0.141292
-0.0319269
0.051392
-0.0533161
-0.0202645
-0.222824
0.249375
-0.16198
-0.41297
-0.434488
0.254754
0.640955

## Sheet: KS1_RNA_SVs
surrogate_variable_1	surrogate_variable_2	surrogate_variable_3
0.529816	-0.461328	0.329809
0.0205702	-0.302761	-0.285668
-0.635676	-0.159774	-0.148027
-0.394788	0.270753	0.240578
-0.0890496	0.030178	0.303508
0.174862	0.351886	0.217686
0.236265	0.266865	-0.584862
0.0671377	0.269481	0.349929
0.212715	0.250048	-0.346324
-0.121852	-0.515347	-0.0766296

## Sheet: KS2_RNA_SVs
surrogate_variable_1	surrogate_variable_2	surrogate_variable_3
-0.114593	-0.37419	0.281075
0.509708	0.437442	0.0748865
0.261385	0.201848	-0.044041
-0.0261102	-0.411666	-0.460859
-0.0763111	-0.141016	-0.44899
0.204099	0.198134	-0.119017
-0.0562575	0.0648671	-0.26235
-0.0307585	0.0575324	0.486659
-0.772183	0.425798	0.0755966
0.101022	-0.458749	0.417039

## Sheet: RT1_RNA_SVs
surrogate_variable_1	surrogate_variable_2
-0.101289	0.159102
-0.244483	0.0997282
-0.381763	-0.140508
-0.224767	0.142357
-0.261812	0.202103
-0.0781869	-0.0716614
0.316235	-0.640614
0.112314	-0.140607
0.605748	0.5677
0.149453	-0.334504
-0.220743	0.110935
0.329293	0.0459702
