# Supplementary material for: Leveraging the Mendelian disorders of the epigenetic machinery to systematically map functional epigenetic variation
Source: eLife journal article supplement (doi:10.7554/elife.65884), 2021-08-31
Supplement: supp [file elife-65884-supp-v1.zip › elife_poa_e65884_Figure_3_source_data_1.xlsx]

## Sheet: KS1
log2FoldChange	pvalue	padj	gene_symbol	gene_id
2.31334	5.49157e-06	0.000446527	Il12rb1	ENSMUSG00000000791
0.666453	2.7672e-10	8.08665e-08	Apoe	ENSMUSG00000002985
1.13778	1.15871e-07	1.54898e-05	Ebi3	ENSMUSG00000003206
0.707326	0.00742123	0.1245	Fkbp11	ENSMUSG00000003355
-1.02915	0.000587009	0.0198824	Bicd1	ENSMUSG00000003452
0.517451	0.00036347	0.0136339	Dusp3	ENSMUSG00000003518
0.833159	3.87656e-05	0.00224483	Hif3a	ENSMUSG00000004328
0.142639	0.0116558	0.167008	Arhgef18	ENSMUSG00000004568
0.149339	0.0164477	0.202895	Arid3b	ENSMUSG00000004661
-1.27728	2.80351e-19	2.93574e-16	Ndrg1	ENSMUSG00000005125
-0.904205	1.15412e-06	0.000114336	Igf1r	ENSMUSG00000005533
-0.801246	0.00518369	0.0988441	Hmgcll1	ENSMUSG00000007908
0.884843	1.92816e-46	1.21146e-42	Apobec3	ENSMUSG00000009585
-0.992778	0.0486538	0.377602	Slc25a13	ENSMUSG00000015112
-0.538939	0.0335341	0.309802	Rxra	ENSMUSG00000015846
-0.645633	3.39581e-06	0.000298404	Gatsl2	ENSMUSG00000015944
0.187507	0.00155493	0.0426266	Ppdpf	ENSMUSG00000016344
-1.36436	0.0324064	0.304349	Pls3	ENSMUSG00000016382
2.27964	0.000427145	0.0154238	Eya2	ENSMUSG00000017897
0.173907	0.00457972	0.0912025	Zbtb4	ENSMUSG00000018750
1.5598	0.00217083	0.0541243	Rcn3	ENSMUSG00000019539
-0.949421	5.50785e-06	0.000446527	Nuak1	ENSMUSG00000020032
-0.462679	0.0574928	0.408628	Lgr5	ENSMUSG00000020140
0.121153	0.0255081	0.262519	Dock2	ENSMUSG00000020143
-0.57688	6.22866e-08	8.99648e-06	Il9r	ENSMUSG00000020279
0.153705	0.0214836	0.238559	Tnip1	ENSMUSG00000020400
-1.7784	3.18911e-08	4.94745e-06	Abca8b	ENSMUSG00000020620
-0.264262	0.031959	0.302233	Adcy3	ENSMUSG00000020654
-0.717126	0.0133403	0.180641	Sh3yl1	ENSMUSG00000020669
0.50416	0.00416866	0.0858744	Cacnb1	ENSMUSG00000020882
0.242974	0.00013579	0.00605086	Nin	ENSMUSG00000021068
0.766899	0.000117105	0.00531241	Ryr2	ENSMUSG00000021313
-0.655199	0.000114151	0.00527087	Kif13a	ENSMUSG00000021375
-0.88507	0.00707046	0.120751	Mctp1	ENSMUSG00000021596
-0.945649	0.0322441	0.303189	Vcan	ENSMUSG00000021614
-0.441545	0.00893546	0.141059	Pde4d	ENSMUSG00000021699
-1.836	0.000198241	0.00822146	Thbs4	ENSMUSG00000021702
-1.03584	4.82342e-06	0.000406786	Spry2	ENSMUSG00000022114
-0.772162	1.37082e-11	5.55668e-09	Pdzd2	ENSMUSG00000022197
-0.195534	0.0279168	0.279073	Ripk3	ENSMUSG00000022221
-0.695485	0.0127754	0.176802	Fzd6	ENSMUSG00000022297
-0.154862	0.02469	0.257472	Oxr1	ENSMUSG00000022307
-0.867479	0.0452026	0.365283	Angpt1	ENSMUSG00000022309
-0.250855	0.0578727	0.410168	Il1rap	ENSMUSG00000022514
-0.887133	0.0273269	0.275594	Rabl2	ENSMUSG00000022621
-0.770806	9.24381e-05	0.0044335	App	ENSMUSG00000022892
-0.933897	0.000170772	0.00722534	Adcy6	ENSMUSG00000022994
1.0873	1.9721e-22	3.5402e-19	Kcnk5	ENSMUSG00000023243
-0.634267	0.00966205	0.147483	Tnfrsf21	ENSMUSG00000023915
-0.568441	4.0685e-05	0.00232385	Crim1	ENSMUSG00000024074
-1.24717	0.00506677	0.0974564	Nrxn1	ENSMUSG00000024109
0.153987	0.0292116	0.286552	Mapre2	ENSMUSG00000024277
0.849764	3.2339e-08	4.95575e-06	Myo1f	ENSMUSG00000024300
-0.50546	4.84505e-09	1.01354e-06	Gabbr1	ENSMUSG00000024462
0.186373	0.022836	0.246316	Pdcd4	ENSMUSG00000024975
-0.428033	0.00158234	0.0429982	Gpam	ENSMUSG00000024978
-1.0122	0.0164532	0.202895	Gfra1	ENSMUSG00000025089
-1.26626	2.57942e-07	3.1469e-05	Maged1	ENSMUSG00000025151
-0.840854	0.0253827	0.261877	Maged2	ENSMUSG00000025268
-1.01649	7.43506e-08	1.04976e-05	Eya1	ENSMUSG00000025932
-1.22762	0.00737726	0.12438	Wnt10a	ENSMUSG00000026167
-1.21609	0.00556599	0.104081	Serpine2	ENSMUSG00000026249
-0.754825	3.53902e-12	1.58826e-09	Atp1b1	ENSMUSG00000026576
0.562283	0.0437906	0.358484	Fam129b	ENSMUSG00000026796
-1.8962	2.65148e-07	3.17319e-05	Nr4a2	ENSMUSG00000026826
-0.592319	0.0212683	0.237562	Gca	ENSMUSG00000026893
-0.604403	0.024585	0.257018	Pkp4	ENSMUSG00000026991
-0.746302	0.0238522	0.252463	Tfpi	ENSMUSG00000027082
-0.670132	0.0165573	0.203538	Gnb4	ENSMUSG00000027669
-0.283225	0.00867754	0.138326	Tnik	ENSMUSG00000027692
-0.811746	0.00711197	0.120769	Pfn2	ENSMUSG00000027805
-0.680803	0.0192009	0.222994	Trim2	ENSMUSG00000027993
0.243466	0.00674034	0.117315	Zbtb7b	ENSMUSG00000028042
0.2995	0.000254345	0.0102317	Pear1	ENSMUSG00000028073
0.206134	0.00808481	0.13092	Lrba	ENSMUSG00000028080
-0.271048	0.0437877	0.358484	Ndufaf4	ENSMUSG00000028261
-1.06242	0.0304417	0.293511	Spaca1	ENSMUSG00000028264
-1.72439	0.0010777	0.0325539	Fmn2	ENSMUSG00000028354
0.374051	0.00337633	0.0740436	Alad	ENSMUSG00000028393
-0.949743	0.0295066	0.288545	Dock7	ENSMUSG00000028556
-0.961725	0.0119255	0.169163	Fggy	ENSMUSG00000028573
0.624531	0.055332	0.401066	Errfi1	ENSMUSG00000028967
0.557268	0.0195602	0.224758	Prkcz	ENSMUSG00000029053
0.885278	1.49704e-07	1.90018e-05	Afap1	ENSMUSG00000029094
0.138189	0.0138194	0.184152	Tbc1d14	ENSMUSG00000029192
-1.33606	0.000174608	0.00731376	Uchl1	ENSMUSG00000029223
0.290921	0.00288603	0.0665429	Rilpl2	ENSMUSG00000029401
-0.703511	0.0437722	0.358484	Gstk1	ENSMUSG00000029864
-1.26894	0.0364812	0.321436	Rasgef1a	ENSMUSG00000030134
-0.808501	0.0118688	0.168906	Plekha5	ENSMUSG00000030231
-1.64342	0.0121926	0.171571	Rassf8	ENSMUSG00000030259
-0.390916	0.0148772	0.19253	Ccdc91	ENSMUSG00000030301
-0.725748	0.0216772	0.239785	Tspan9	ENSMUSG00000030352
-0.176416	0.00903527	0.142116	Sipa1l3	ENSMUSG00000030583
-1.23698	0.00361513	0.0776542	Tmem159	ENSMUSG00000030917
-0.802541	0.000134362	0.00600849	Cask	ENSMUSG00000031012
-2.38071	4.70744e-16	3.94358e-13	Col4a5	ENSMUSG00000031274
-0.630408	8.86722e-05	0.00433174	Chic1	ENSMUSG00000031327
-0.671927	0.00823479	0.132835	Atp11a	ENSMUSG00000031441
-0.496565	0.000138182	0.00611406	Dusp4	ENSMUSG00000031530
-0.225486	0.0166282	0.203853	Saraf	ENSMUSG00000031532
-1.40184	1.20208e-10	3.68422e-08	Nr3c2	ENSMUSG00000031618
-0.326694	8.23957e-05	0.00406033	Slc25a4	ENSMUSG00000031633
1.08419	5.08737e-05	0.00270881	Pvrl1	ENSMUSG00000032012
0.996055	3.96118e-09	8.5821e-07	Pde4a	ENSMUSG00000032177
-1.96934	0.00234771	0.0572841	Fam83b	ENSMUSG00000032358
-0.757702	0.003301	0.0730287	Plscr1	ENSMUSG00000032369
-0.632362	2.10394e-07	2.61763e-05	Ccdc88a	ENSMUSG00000032740
-0.374871	0.000379293	0.0140596	Armcx2	ENSMUSG00000033436
-0.695018	0.00712926	0.120899	9430020K01Rik	ENSMUSG00000033960
-0.336944	0.00793786	0.129169	Ccs	ENSMUSG00000034108
-0.472304	0.000825993	0.0264124	Golim4	ENSMUSG00000034109
-0.23084	0.000403053	0.0148093	Mast4	ENSMUSG00000034751
0.409378	0.040753	0.342773	Tgfbi	ENSMUSG00000035493
-0.358163	0.0506808	0.384881	Ntng2	ENSMUSG00000035513
-0.736606	0.0261865	0.266661	Tmtc3	ENSMUSG00000036676
0.298601	0.00710735	0.120769	Cnnm4	ENSMUSG00000037408
-0.404526	0.00490754	0.095314	Tbc1d2b	ENSMUSG00000037410
-0.565004	3.21028e-05	0.00193944	Vopp1	ENSMUSG00000037788
-1.90141	2.87759e-09	6.57451e-07	Zfp365	ENSMUSG00000037855
-1.81281	0.00133809	0.0385136	Dusp8	ENSMUSG00000037887
-1.07714	9.00159e-05	0.00435054	Plcl1	ENSMUSG00000038349
-0.961691	0.0553998	0.401066	Vasn	ENSMUSG00000039646
-1.24736	0.0514334	0.38821	Nhsl1	ENSMUSG00000039835
0.185135	0.00195708	0.0508113	Pik3cd	ENSMUSG00000039936
-1.26331	0.0184661	0.218215	Gpr176	ENSMUSG00000040133
-0.981084	0.00375367	0.0797273	Thbs1	ENSMUSG00000040152
0.94869	0.0110949	0.16155	Tmem51	ENSMUSG00000040616
-1.99471	0.0239083	0.252463	AK129341	ENSMUSG00000040729
-1.04865	0.0553105	0.401066	Agbl2	ENSMUSG00000040812
-1.02518	2.141e-08	3.58717e-06	Slc39a11	ENSMUSG00000041654
0.420106	0.0288141	0.284511	Adrbk2	ENSMUSG00000042249
-0.954857	0.0540033	0.396904	Sestd1	ENSMUSG00000042272
-0.647929	0.0379247	0.329345	Lgalsl	ENSMUSG00000042363
-1.60381	7.82676e-21	1.09279e-17	Reln	ENSMUSG00000042453
-0.324095	4.78941e-05	0.00261669	Gprasp1	ENSMUSG00000043384
-1.3263	0.0116434	0.167008	Zc2hc1a	ENSMUSG00000043542
1.05267	1.40774e-08	2.5271e-06	Unc5cl	ENSMUSG00000043592
-0.848011	2.88862e-10	8.24962e-08	Slc36a4	ENSMUSG00000043885
-0.957782	0.0174135	0.210006	Ccdc84	ENSMUSG00000043923
-1.00936	0.00321342	0.071491	Ly6k	ENSMUSG00000044678
-1.04495	0.00349447	0.0757096	Dmd	ENSMUSG00000045103
1.40194	0.000723581	0.0238058	Fndc7	ENSMUSG00000045326
-1.34699	0.00275426	0.064331	Gprc5a	ENSMUSG00000046733
-0.350158	0.0200143	0.228568	Fbxo30	ENSMUSG00000047648
0.251839	0.0122547	0.171912	Rell1	ENSMUSG00000047881
-1.09757	0.00684732	0.118354	Nat8l	ENSMUSG00000048142
-1.12036	6.59649e-07	7.0247e-05	Dip2c	ENSMUSG00000048264
0.389338	0.0258031	0.264363	Cyp4f16	ENSMUSG00000048440
0.659928	0.00709108	0.120769	Gpr55	ENSMUSG00000049608
0.50281	0.0291823	0.286488	Nlrp10	ENSMUSG00000049709
-1.35426	0.00699099	0.120145	Armcx4	ENSMUSG00000049804
-0.200018	0.0356036	0.31934	Nlrc3	ENSMUSG00000049871
1.31357	1.51794e-11	5.78013e-09	Amz1	ENSMUSG00000050022
-1.43241	0.00344244	0.0751001	Lgr4	ENSMUSG00000050199
-0.824722	3.69086e-07	4.06837e-05	Slc29a4	ENSMUSG00000050822
-2.10243	6.75802e-08	9.65015e-06	Rgs13	ENSMUSG00000051079
-1.01865	0.0577897	0.409811	Cox6b2	ENSMUSG00000051811
-1.34882	8.77074e-20	1.00194e-16	Pard3b	ENSMUSG00000052062
-1.48982	0.0115309	0.165786	B630019K06Rik	ENSMUSG00000052364
-0.503522	0.00108773	0.0327779	Pbx1	ENSMUSG00000052534
0.594566	1.82921e-28	7.66195e-25	Cbx7	ENSMUSG00000053411
-0.684937	0.00175496	0.046525	Tanc2	ENSMUSG00000053580
0.31959	3.49035e-06	0.000304582	Syne3	ENSMUSG00000054150
-1.21068	0.00336249	0.0739983	Epm2a	ENSMUSG00000055493
-1.20051	0.0193555	0.223549	Nap1l3	ENSMUSG00000055733
-0.826165	0.0236262	0.251386	Irs1	ENSMUSG00000055980
0.643781	0.00934194	0.144748	Nod2	ENSMUSG00000055994
-1.20499	0.0042514	0.0864452	Pla2g4a	ENSMUSG00000056220
0.501428	0.00703675	0.120633	Fry	ENSMUSG00000056602
0.485209	0.00992297	0.150051	Skap1	ENSMUSG00000057058
1.98883	0.00966259	0.147483	Adamts17	ENSMUSG00000058145
0.669997	1.69343e-08	2.91501e-06	2021-09-09	ENSMUSG00000059248
-1.23105	0.0160552	0.200148	Eda	ENSMUSG00000059327
-0.665175	1.13701e-11	4.76256e-09	Arhgef12	ENSMUSG00000059495
-1.97314	0.00426899	0.0865228	Fam78b	ENSMUSG00000060568
0.752869	0.0193073	0.223403	Ifnlr1	ENSMUSG00000062157
0.808069	0.0290577	0.285727	Slc39a4	ENSMUSG00000063354
-0.635174	0.0426203	0.354035	Hmgn3	ENSMUSG00000066456
1.03956	2.54981e-08	4.05581e-06	Lgals1	ENSMUSG00000068220
-0.653722	2.35588e-06	0.000219289	Zfp827	ENSMUSG00000071064
0.163615	0.0565326	0.4048	B3gat3	ENSMUSG00000071649
1.017	0.00355634	0.0767851	Osgin1	ENSMUSG00000074063
0.345992	0.00113912	0.0340004	Mgst2	ENSMUSG00000074604
0.159819	0.0233309	0.249512	Ccdc47	ENSMUSG00000078622
0.426724	1.03566e-05	0.000770068	Cbx6	ENSMUSG00000089715
-0.498282	0.05332	0.395008	Itpripl2	ENSMUSG00000095115

## Sheet: KS2
log2FoldChange	pvalue	padj	gene_symbol	gene_id
0.457135	0.000752612	0.0533619	Ngfr	ENSMUSG00000000120
1.1482	0.00179753	0.0931573	Il12rb1	ENSMUSG00000000791
0.566659	0.00404446	0.151759	Ebi3	ENSMUSG00000003206
0.617784	0.00856831	0.234099	Fkbp11	ENSMUSG00000003355
-1.11649	2.78229e-05	0.00452887	Bicd1	ENSMUSG00000003452
-0.746922	0.000109498	0.013182	Plekha8	ENSMUSG00000005225
-1.08559	4.40284e-10	5.01633e-07	Igf1r	ENSMUSG00000005533
-0.709774	0.043111	0.508757	P4htm	ENSMUSG00000006675
0.365431	2.25586e-05	0.00372442	Relt	ENSMUSG00000008318
0.14298	0.0148466	0.313543	Cdk9	ENSMUSG00000009555
0.308825	0.00379373	0.145179	Rassf1	ENSMUSG00000010067
-0.764621	0.0152894	0.315309	Tppp3	ENSMUSG00000014846
-1.18359	0.00889917	0.237523	Slc25a13	ENSMUSG00000015112
-0.726794	1.37701e-08	1.06094e-05	Actn1	ENSMUSG00000015143
-0.514686	0.0304646	0.43413	Rxra	ENSMUSG00000015846
-0.508382	0.000315092	0.0285502	Gatsl2	ENSMUSG00000015944
0.125759	0.035027	0.463165	Ppdpf	ENSMUSG00000016344
-0.724752	6.1491e-05	0.00807559	Ahr	ENSMUSG00000019256
-0.202956	0.0178719	0.337047	Zwint	ENSMUSG00000019923
0.63103	0.00352226	0.137968	Camkk1	ENSMUSG00000020785
-0.628808	1.57196e-05	0.00288367	Cdc42bpb	ENSMUSG00000021279
0.509182	8.12233e-12	1.5645e-08	Gpr132	ENSMUSG00000021298
-0.630766	5.79952e-05	0.0078853	Kif13a	ENSMUSG00000021375
0.148427	0.0137303	0.30225	Lpcat1	ENSMUSG00000021608
0.454237	0.019335	0.35036	Tsc22d1	ENSMUSG00000022010
-0.995413	0.000558387	0.0440091	Slc22a17	ENSMUSG00000022199
-1.25612	2.42196e-07	9.65193e-05	Fzd6	ENSMUSG00000022297
-0.375233	0.0399206	0.490811	Stk3	ENSMUSG00000022329
0.240888	0.00846273	0.232313	Pde1b	ENSMUSG00000022489
0.591677	1.0056e-08	8.30125e-06	Kcnk5	ENSMUSG00000023243
-0.465289	0.0293699	0.429436	Tnfrsf21	ENSMUSG00000023915
0.182286	0.00449174	0.158538	Fgd2	ENSMUSG00000024013
0.141535	0.0207713	0.360984	Cmtr1	ENSMUSG00000024019
0.530406	0.000899392	0.0604318	Cacna1h	ENSMUSG00000024112
0.295767	0.000908772	0.0607091	Myo1f	ENSMUSG00000024300
0.299378	0.0085419	0.233931	Btnl2	ENSMUSG00000024340
-0.358779	0.00060661	0.0455233	Slc12a2	ENSMUSG00000024597
-0.658106	0.00352254	0.137968	Tjp2	ENSMUSG00000024812
0.218208	0.00104546	0.0663264	Pacs1	ENSMUSG00000024855
-0.514917	0.0397275	0.490525	Apba1	ENSMUSG00000024897
0.181881	0.0206049	0.360984	Pdcd4	ENSMUSG00000024975
-0.967846	1.19944e-05	0.00231032	Maged1	ENSMUSG00000025151
0.212871	0.0141539	0.308054	Scd2	ENSMUSG00000025203
-0.825332	0.00905717	0.23902	Maged2	ENSMUSG00000025268
0.394629	0.0268591	0.409769	Crisp3	ENSMUSG00000025433
-1.82559	0.000985149	0.0644281	2021-03-08	ENSMUSG00000025702
-0.657286	9.87018e-13	3.80232e-09	Ptpn14	ENSMUSG00000026604
0.123485	0.00914646	0.239695	Psd4	ENSMUSG00000026979
-0.286507	0.00237841	0.109856	Tnik	ENSMUSG00000027692
-0.798028	0.00928484	0.24144	Fam92a	ENSMUSG00000028218
-1.29326	0.000599298	0.0455233	Dock7	ENSMUSG00000028556
0.437682	1.72028e-05	0.00305865	Padi2	ENSMUSG00000028927
0.472572	0.00212222	0.100932	Sorcs2	ENSMUSG00000029093
-0.511633	0.00585782	0.188154	Ppargc1a	ENSMUSG00000029167
0.144195	0.00982859	0.24937	Tbc1d14	ENSMUSG00000029192
-0.592702	0.0158039	0.32072	Tgfbr3	ENSMUSG00000029287
0.219661	0.0263277	0.407321	Tpst2	ENSMUSG00000029344
0.296631	1.9809e-06	0.000654094	Pitpnm2	ENSMUSG00000029406
-1.05977	0.0145238	0.311933	Ret	ENSMUSG00000030110
-0.410529	0.000370997	0.0317601	Erc1	ENSMUSG00000030172
-0.943731	0.0002846	0.0271532	Plekha5	ENSMUSG00000030231
-1.05964	0.0218525	0.369751	Srgap3	ENSMUSG00000030257
-0.430327	0.00391391	0.147426	Ccdc91	ENSMUSG00000030301
0.805834	4.18257e-05	0.00596765	Lilra6	ENSMUSG00000030427
0.224233	0.00578472	0.187266	Rab30	ENSMUSG00000030643
-0.758286	4.0374e-05	0.00583253	Cask	ENSMUSG00000031012
-1.64507	1.13953e-07	5.48733e-05	Col4a5	ENSMUSG00000031274
-0.570715	7.8096e-06	0.00170293	Chic1	ENSMUSG00000031327
0.146207	0.00354122	0.137968	Flna	ENSMUSG00000031328
-0.669445	0.0128164	0.289296	Atp11a	ENSMUSG00000031441
-0.719201	0.000528632	0.0424264	Nr3c2	ENSMUSG00000031618
0.156597	0.037821	0.483578	Gse1	ENSMUSG00000031822
0.372527	0.0163461	0.324592	Pde4a	ENSMUSG00000032177
-0.618197	0.0182808	0.338575	Lysmd2	ENSMUSG00000032184
-0.257056	0.00461404	0.161589	Nedd4	ENSMUSG00000032216
-0.72564	1.84255e-07	7.8868e-05	Hcrtr2	ENSMUSG00000032360
-0.546585	0.0081746	0.22875	Plscr1	ENSMUSG00000032369
-1.37258	0.00445691	0.158001	Fbxl2	ENSMUSG00000032507
-0.905453	0.00813079	0.228076	Ryk	ENSMUSG00000032547
0.397665	2.20227e-06	0.000687882	Fanca	ENSMUSG00000032815
0.453128	0.033535	0.457033	Shf	ENSMUSG00000033256
-0.181132	0.0152217	0.314811	Lrrc58	ENSMUSG00000034158
1.06726	2.17888e-10	2.79793e-07	Chst11	ENSMUSG00000034612
0.301337	0.0203945	0.360397	Gna15	ENSMUSG00000034792
-0.298569	0.0269468	0.409769	Dhcr24	ENSMUSG00000034926
0.840978	0.000125305	0.0144815	Adat3	ENSMUSG00000035370
-0.761837	3.38877e-08	2.30377e-05	Ntng2	ENSMUSG00000035513
0.127944	0.0258185	0.403768	Dok3	ENSMUSG00000035711
-0.829056	0.00028547	0.0271532	Zscan12	ENSMUSG00000036721
0.707177	0.00145269	0.0832433	Zfyve28	ENSMUSG00000037224
-0.26885	0.0123876	0.284055	Atg14	ENSMUSG00000037526
-0.260386	0.0448946	0.51524	Vopp1	ENSMUSG00000037788
-0.463636	0.0259267	0.40441	Fbxw17	ENSMUSG00000037816
-1.35377	3.28394e-05	0.00506033	Zfp365	ENSMUSG00000037855
0.225528	0.0112428	0.27017	Rara	ENSMUSG00000037992
0.414469	0.00342671	0.137734	Igsf9	ENSMUSG00000037995
-1.14608	0.014655	0.311933	Vasn	ENSMUSG00000039646
-1.0771	4.23451e-06	0.00108747	Clstn1	ENSMUSG00000039953
0.252312	0.00134378	0.0788328	Bmf	ENSMUSG00000040093
0.259666	0.0206586	0.360984	Thbs1	ENSMUSG00000040152
-0.397168	9.48944e-05	0.0117959	Cul9	ENSMUSG00000040327
0.537376	1.26099e-10	2.0819e-07	Spns2	ENSMUSG00000040447
-1.22234	0.00288022	0.123742	Kcnj2	ENSMUSG00000041695
-0.125417	0.0233013	0.381976	Arel1	ENSMUSG00000042350
-0.942774	4.66413e-07	0.000173882	Reln	ENSMUSG00000042453
0.121057	0.0417133	0.503733	Sh2b3	ENSMUSG00000042594
0.126495	0.00933513	0.241745	Itpr3	ENSMUSG00000042644
0.602309	0.000575619	0.0446472	Shcbp1l	ENSMUSG00000042708
-0.247156	0.0326838	0.452367	Tmem18	ENSMUSG00000043061
-0.955576	0.0429445	0.508514	Zc2hc1a	ENSMUSG00000043542
-0.449292	0.000771957	0.0543995	Slc36a4	ENSMUSG00000043885
-0.914722	0.03141	0.441613	Wdfy3	ENSMUSG00000043940
-0.669087	0.0132092	0.295851	Dock5	ENSMUSG00000044447
-0.963398	0.00112731	0.0696699	Dmd	ENSMUSG00000045103
-0.531053	0.00638421	0.197001	Zfp518b	ENSMUSG00000046572
0.267485	0.0159684	0.32151	Rell1	ENSMUSG00000047881
-0.839535	9.86168e-06	0.00196502	Dip2c	ENSMUSG00000048264
0.27133	0.00128969	0.0768297	Ccdc69	ENSMUSG00000049588
0.145216	0.00341718	0.137734	2021-09-06	ENSMUSG00000050379
-0.47117	0.00638451	0.197001	Slc29a4	ENSMUSG00000050822
-0.358563	0.0369483	0.478497	Pard3b	ENSMUSG00000052062
0.225969	0.00122771	0.0743765	Pld4	ENSMUSG00000052160
-0.383949	0.00486927	0.166491	Pbx1	ENSMUSG00000052534
-0.584262	0.00254703	0.114985	Tanc2	ENSMUSG00000053580
-0.949545	0.0112445	0.27017	Epm2a	ENSMUSG00000055493
-1.25563	0.0043148	0.15458	Nap1l3	ENSMUSG00000055733
-1.1654	0.00217361	0.102953	Pla2g4a	ENSMUSG00000056220
0.317001	3.93976e-05	0.00576352	2021-09-09	ENSMUSG00000059248
-0.724018	3.71732e-17	4.2961e-13	Arhgef12	ENSMUSG00000059495
-0.764119	0.0189702	0.345257	Obscn	ENSMUSG00000061462
-0.850995	0.00201884	0.0987213	Hmgn3	ENSMUSG00000066456
-0.590634	3.78005e-06	0.00101595	Zfp827	ENSMUSG00000071064
0.467669	0.0266079	0.408697	Arhgef10	ENSMUSG00000071176
-0.377201	0.00837993	0.230588	2700089E24Rik	ENSMUSG00000072704
-0.865466	0.000396837	0.0334762	Zcchc3	ENSMUSG00000074682
0.143929	0.040015	0.491449	Plxnc1	ENSMUSG00000074785
-0.496176	1.95248e-12	5.64122e-09	Cbx6	ENSMUSG00000089715
0.421135	0.00197601	0.0981985	Pira2	ENSMUSG00000089942
-0.482825	0.0389912	0.490224	Gm2237	ENSMUSG00000093979

## Sheet: RT1
log2FoldChange	pvalue	padj	gene_symbol	gene_id
0.137993	0.0100151	0.0727437	Brat1	ENSMUSG00000000148
0.137297	0.0179613	0.111163	Gna12	ENSMUSG00000000149
0.191894	0.0011726	0.0143742	Mnt	ENSMUSG00000000282
0.110223	0.0176137	0.109348	Acvr1b	ENSMUSG00000000532
0.512329	0.0403641	0.194555	Abhd15	ENSMUSG00000000686
-1.15263	0.00319574	0.0311559	Tubb6	ENSMUSG00000001473
0.128422	0.0573395	0.243056	Dyrk1b	ENSMUSG00000002409
0.197086	0.00787383	0.0610551	Tgfb1	ENSMUSG00000002603
0.298222	0.00793621	0.0613808	Arrdc2	ENSMUSG00000002910
0.3796	0.00636258	0.0524065	Bcl2l12	ENSMUSG00000003190
-0.430516	0.00155426	0.017981	Fkbp11	ENSMUSG00000003355
0.186636	0.043003	0.202666	Med29	ENSMUSG00000003444
-1.36442	1.34194e-22	1.07803e-19	Bicd1	ENSMUSG00000003452
0.288018	1.06431e-06	3.922e-05	Dnase2a	ENSMUSG00000003812
-0.149032	0.011814	0.0819565	Cdip1	ENSMUSG00000004071
-1.50246	1.114e-06	4.09258e-05	Large	ENSMUSG00000004383
1.12267	0.0064289	0.0528073	Clec11a	ENSMUSG00000004473
0.107957	0.0206296	0.122638	Arhgef18	ENSMUSG00000004568
-0.139117	0.0332742	0.172305	Apba3	ENSMUSG00000004931
0.287708	0.00159898	0.0184557	Rasa4	ENSMUSG00000004952
-2.12308	3.53493e-62	4.25959e-58	Plekha8	ENSMUSG00000005225
-0.864769	2.04804e-09	1.66749e-07	Adcy9	ENSMUSG00000005580
-0.828456	0.000152512	0.00270659	P4htm	ENSMUSG00000006675
0.112385	0.0496776	0.222782	Pknox1	ENSMUSG00000006705
-0.268727	0.00252315	0.025942	Mettl1	ENSMUSG00000006732
0.236133	0.0300874	0.159883	Rad51c	ENSMUSG00000007646
0.162558	0.00320048	0.0311768	Arid1a	ENSMUSG00000007880
0.158876	0.00715671	0.0570298	Ubc	ENSMUSG00000008348
0.26293	5.11658e-07	2.11146e-05	Psen2	ENSMUSG00000010609
-0.20259	0.00044361	0.00650538	Dhdds	ENSMUSG00000012117
-2.02965	1.93862e-18	1.01567e-15	Yes1	ENSMUSG00000014932
-1.42632	5.87953e-08	3.174e-06	Slc25a13	ENSMUSG00000015112
-0.4522	8.99477e-07	3.40839e-05	Actn1	ENSMUSG00000015143
-0.971868	2.64196e-05	0.000649707	Map2	ENSMUSG00000015222
-2.13517	3.17609e-19	2.12621e-16	Pls3	ENSMUSG00000016382
0.0834194	0.0165151	0.104685	Cyth1	ENSMUSG00000017132
-0.084267	0.0237612	0.135634	Psmd3	ENSMUSG00000017221
-0.140075	0.0392754	0.19138	Zfp207	ENSMUSG00000017421
0.146404	0.0277732	0.151228	Ghdc	ENSMUSG00000017747
0.105658	0.0541146	0.234606	Vezf1	ENSMUSG00000018377
-0.135874	0.00661867	0.0538521	Srsf1	ENSMUSG00000018379
-1.6945	8.3076e-10	7.88682e-08	Akap1	ENSMUSG00000018428
1.07365	0.000660358	0.00903214	Kcnab3	ENSMUSG00000018470
0.178269	0.000312156	0.00485958	Chd3	ENSMUSG00000018474
-0.106045	0.0357868	0.180591	Zfyve27	ENSMUSG00000018820
-0.830473	8.61132e-08	4.31182e-06	Rab32	ENSMUSG00000019832
0.238537	1.07879e-07	5.17906e-06	Uhrf1bp1l	ENSMUSG00000019951
0.206539	0.0335398	0.173234	Sgk1	ENSMUSG00000019970
0.13212	0.00192692	0.0210512	Cdk17	ENSMUSG00000020015
0.169499	0.0174713	0.108744	Tmcc3	ENSMUSG00000020023
0.121641	0.0105346	0.0755241	Dnajb12	ENSMUSG00000020109
-1.16855	1.30007e-05	0.00035363	Meis1	ENSMUSG00000020160
0.109617	0.0569403	0.242278	Pofut2	ENSMUSG00000020260
0.188541	0.000121678	0.00224192	Jade2	ENSMUSG00000020387
0.128122	0.0387769	0.189944	Supt4a	ENSMUSG00000020485
0.0994654	0.00209368	0.0224856	Prkar1a	ENSMUSG00000020612
0.171149	0.000901531	0.0114957	Unk	ENSMUSG00000020770
-0.126719	0.007333	0.0580951	Fbf1	ENSMUSG00000020776
-0.448641	0.0424227	0.200941	Ube2o	ENSMUSG00000020802
-1.36183	9.77031e-19	5.35147e-16	Pld2	ENSMUSG00000020828
0.110231	0.00405689	0.0372036	Stat5b	ENSMUSG00000020919
-1.23721	8.53425e-05	0.00167488	Plcd3	ENSMUSG00000020937
0.193924	1.55459e-05	0.000414442	4933426M11Rik	ENSMUSG00000021133
0.141994	0.000550351	0.00779146	Entpd5	ENSMUSG00000021236
0.63183	0.00701378	0.0560823	Fos	ENSMUSG00000021250
-0.913979	1.65639e-10	1.8481e-08	Cdc42bpb	ENSMUSG00000021279
1.38743	1.94444e-13	3.90508e-11	Ryr2	ENSMUSG00000021313
0.153332	0.00227815	0.0239753	Hivep1	ENSMUSG00000021366
-1.13468	4.50563e-21	3.1937e-18	Kif13a	ENSMUSG00000021375
-1.41183	3.3237e-06	0.000106802	Tppp	ENSMUSG00000021573
0.0950738	0.0280107	0.152109	Rad17	ENSMUSG00000021635
-0.65876	0.046161	0.213025	Scamp1	ENSMUSG00000021687
-2.14563	1.10665e-08	7.36187e-07	Thbs4	ENSMUSG00000021702
0.144226	0.00061224	0.00849942	Map3k1	ENSMUSG00000021754
0.68716	4.14985e-09	3.22618e-07	Tsc22d1	ENSMUSG00000022010
-0.202511	0.00588821	0.0494101	Pabpc1	ENSMUSG00000022283
-1.69566	1.53218e-13	3.12927e-11	Fzd6	ENSMUSG00000022297
0.10545	0.0467695	0.214531	Slc38a2	ENSMUSG00000022462
-0.0746849	0.0283386	0.153021	Aco2	ENSMUSG00000022477
0.14742	0.000582861	0.00818872	Atp13a3	ENSMUSG00000022533
-1.01682	2.518e-07	1.11963e-05	Rabl2	ENSMUSG00000022621
0.111126	0.0566293	0.241481	Dyrk1a	ENSMUSG00000022897
-0.226616	0.00549874	0.046893	Cd86	ENSMUSG00000022901
0.0879531	0.0359446	0.180992	Dip2b	ENSMUSG00000023026
0.556666	1.77315e-05	0.000466517	Slc4a8	ENSMUSG00000023032
-0.177713	0.00202994	0.0218987	Mtch1	ENSMUSG00000024012
0.445164	6.06121e-05	0.00125494	Abcg1	ENSMUSG00000024030
-0.626216	3.9317e-07	1.67243e-05	Cacna1h	ENSMUSG00000024112
0.19109	0.0162673	0.103223	Fkbp5	ENSMUSG00000024222
0.284902	0.000350204	0.00531286	Btnl2	ENSMUSG00000024340
0.116259	0.00954306	0.0700625	Gnl1	ENSMUSG00000024429
0.183033	0.00294465	0.0292764	Kif20b	ENSMUSG00000024795
-0.637683	0.0325609	0.169926	Slit1	ENSMUSG00000025020
0.179433	5.46359e-06	0.000166674	Nt5c2	ENSMUSG00000025041
0.231609	0.000193814	0.00330333	Taf5	ENSMUSG00000025049
-0.167638	0.00148906	0.0173868	Pcyt2	ENSMUSG00000025137
-1.97835	1.80358e-60	1.08666e-56	Maged1	ENSMUSG00000025151
0.0908576	0.0363667	0.182211	Ldb1	ENSMUSG00000025223
-0.860634	0.0122585	0.0841303	Tmem180	ENSMUSG00000025227
0.238144	0.00450588	0.0400707	Baiap2	ENSMUSG00000025372
0.12226	0.0306777	0.162205	Tnrc6c	ENSMUSG00000025571
-1.30763	1.51499e-06	5.35356e-05	Arhgef9	ENSMUSG00000025656
-2.4486	6.21992e-10	6.19421e-08	2021-03-08	ENSMUSG00000025702
0.081457	0.024495	0.138836	Rassf3	ENSMUSG00000025795
0.233472	0.0204786	0.122013	Tspan17	ENSMUSG00000025875
-0.505249	0.0160297	0.102092	Paqr8	ENSMUSG00000025931
1.17013	2.74344e-47	1.10195e-43	Rftn2	ENSMUSG00000025978
0.302198	3.16025e-09	2.50533e-07	Map4k4	ENSMUSG00000026074
-1.24247	9.70758e-08	4.77454e-06	Dst	ENSMUSG00000026131
-1.06436	7.27379e-09	5.12568e-07	Cdc42bpa	ENSMUSG00000026490
-1.85671	9.93381e-14	2.10004e-11	Smyd2	ENSMUSG00000026603
-1.21793	0.000288092	0.00455579	Plxna2	ENSMUSG00000026640
0.276626	2.12957e-13	4.20678e-11	Fam107b	ENSMUSG00000026655
-0.0982547	0.0439952	0.206119	Odf2	ENSMUSG00000026790
-0.83562	7.75212e-06	0.000226182	Pkp4	ENSMUSG00000026991
0.694546	1.19354e-26	1.59802e-23	Itga6	ENSMUSG00000027111
0.370754	9.77629e-05	0.00186442	Casc5	ENSMUSG00000027326
-0.847632	0.0237259	0.135634	Smox	ENSMUSG00000027333
-0.114538	0.0388086	0.189945	Gpcpd1	ENSMUSG00000027346
0.686912	1.45784e-12	2.34226e-10	Nfatc2	ENSMUSG00000027544
0.142592	0.000500276	0.0072023	Rbl1	ENSMUSG00000027641
-0.889227	4.9884e-06	0.000153735	Trim2	ENSMUSG00000027993
-0.1159	0.0365563	0.182857	Gar1	ENSMUSG00000028010
0.123546	0.0397458	0.192654	Zbtb7b	ENSMUSG00000028042
-0.0877572	0.035291	0.178755	Pnisr	ENSMUSG00000028248
0.113385	0.00356327	0.0338101	Map3k7	ENSMUSG00000028284
-2.78008	1.49353e-14	3.82915e-12	Fmn2	ENSMUSG00000028354
0.106262	0.00691671	0.0555616	Ptbp3	ENSMUSG00000028382
-0.800049	0.0542565	0.234863	Prkaa2	ENSMUSG00000028518
-1.33576	1.57169e-07	7.28417e-06	Dock7	ENSMUSG00000028556
0.25032	7.58799e-05	0.00152139	Trit1	ENSMUSG00000028653
0.322507	0.000834161	0.0108549	Stmn1	ENSMUSG00000028832
0.10045	0.0536428	0.233408	Rpa2	ENSMUSG00000028884
-0.151651	0.0340418	0.174853	Mecr	ENSMUSG00000028910
-0.955812	0.0117824	0.0819258	Espn	ENSMUSG00000028943
0.186352	0.000246396	0.00401769	Tbc1d14	ENSMUSG00000029192
0.111725	0.0180037	0.111196	Pds5a	ENSMUSG00000029202
0.152689	0.0173648	0.108467	Rilpl2	ENSMUSG00000029401
-0.291072	3.28219e-05	0.000769462	Pitpnm2	ENSMUSG00000029406
-0.0928937	0.0143375	0.0946363	Atp2a2	ENSMUSG00000029467
0.0974597	0.0224346	0.130724	Kdm2b	ENSMUSG00000029475
0.174607	0.0305104	0.161676	Pop7	ENSMUSG00000029715
0.140987	0.000307633	0.00480802	Mcm7	ENSMUSG00000029730
-2.18618	1.66346e-07	7.67996e-06	Asns	ENSMUSG00000029752
-0.742778	0.000193428	0.00330143	Zfp248	ENSMUSG00000030145
-1.25434	2.96315e-17	1.15181e-14	Plekha5	ENSMUSG00000030231
-0.615692	3.91425e-05	0.000889938	Fah	ENSMUSG00000030630
-0.089892	0.0274551	0.149834	Nomo1	ENSMUSG00000030835
-1.72554	1.4928e-09	1.28487e-07	Tmem159	ENSMUSG00000030917
-1.69175	2.7631e-06	9.12201e-05	Rab39b	ENSMUSG00000031202
-0.655652	3.57613e-08	2.13328e-06	Magee1	ENSMUSG00000031227
0.200866	0.0142785	0.0943808	Rab11fip1	ENSMUSG00000031488
0.675745	1.4083e-08	9.17295e-07	Rbpms	ENSMUSG00000031586
-1.20129	1.58794e-14	3.9864e-12	Nr3c2	ENSMUSG00000031618
-0.494177	2.95682e-13	5.74673e-11	Slc25a4	ENSMUSG00000031633
-0.409622	1.11192e-08	7.36187e-07	Smad1	ENSMUSG00000031681
0.161257	0.00205443	0.0221034	Gse1	ENSMUSG00000031822
-0.573718	0.0375438	0.186097	Folr4	ENSMUSG00000031933
-0.878242	0.00322673	0.0313566	Ldhd	ENSMUSG00000031958
1.35924	1.91684e-15	5.3716e-13	Pvrl1	ENSMUSG00000032012
-0.648759	4.26701e-05	0.000950416	Fdx1	ENSMUSG00000032051
-0.884804	1.02187e-05	0.000290538	Lysmd2	ENSMUSG00000032184
-1.02376	0.000244014	0.00398424	Tmod2	ENSMUSG00000032186
0.241456	0.0440119	0.206119	Zwilch	ENSMUSG00000032400
-1.39541	6.49173e-11	7.82254e-09	Lmo7	ENSMUSG00000033060
-0.336614	0.00438935	0.039358	Slc22a15	ENSMUSG00000033147
-0.0983828	0.0460896	0.213025	Clasp2	ENSMUSG00000033392
0.167212	0.0170739	0.107256	Crlf2	ENSMUSG00000033467
-0.621459	1.04601e-17	4.6683e-15	Golim4	ENSMUSG00000034109
0.738895	1.03774e-17	4.6683e-15	Irf2bpl	ENSMUSG00000034168
0.0955729	0.0567197	0.24168	Mtmr3	ENSMUSG00000034354
-1.01138	3.17721e-06	0.000102918	Kdelc2	ENSMUSG00000034487
0.16879	5.58666e-08	3.04612e-06	Cnot6l	ENSMUSG00000034724
0.265563	5.57558e-06	0.000168809	Mast4	ENSMUSG00000034751
-0.733973	7.63608e-13	1.33355e-10	Dhcr24	ENSMUSG00000034926
-0.663311	6.44276e-06	0.000193123	Tanc1	ENSMUSG00000035168
-0.168547	0.00190188	0.0209104	Oaz1	ENSMUSG00000035242
-0.584936	7.59802e-06	0.000223308	Dos	ENSMUSG00000035640
0.290554	5.08196e-07	2.10438e-05	Chst12	ENSMUSG00000036599
0.149258	0.0377728	0.186848	Ago2	ENSMUSG00000036698
-0.118646	0.0329368	0.171073	Cuedc2	ENSMUSG00000036748
0.129823	0.00769052	0.0600978	Ldlrap1	ENSMUSG00000037295
-1.29539	5.72623e-07	2.33856e-05	Chst7	ENSMUSG00000037347
0.492516	0.000253332	0.00411963	Paqr7	ENSMUSG00000037348
-0.426513	0.000633302	0.00875148	Fbxw17	ENSMUSG00000037816
-1.04505	7.65695e-11	9.13527e-09	Cntln	ENSMUSG00000038070
0.14487	2.80464e-05	0.000679714	Usp38	ENSMUSG00000038250
0.296824	7.4217e-09	5.19951e-07	Bcl9	ENSMUSG00000038256
-0.790122	0.000182491	0.00313698	Plcl1	ENSMUSG00000038349
0.32255	0.0373076	0.185365	Trp53inp2	ENSMUSG00000038375
0.255919	0.00301477	0.0297283	Rras	ENSMUSG00000038387
0.643302	1.1326e-05	0.000317427	Hoxb4	ENSMUSG00000038692
-1.29995	7.07986e-09	5.01837e-07	Dsel	ENSMUSG00000038702
-0.26552	0.000140349	0.00252042	A230050P20Rik	ENSMUSG00000038884
0.194141	0.0112475	0.0791147	Dap	ENSMUSG00000039168
-0.284249	0.000858614	0.0110596	Micu3	ENSMUSG00000039478
-0.822727	0.022697	0.131743	Vasn	ENSMUSG00000039646
0.164888	0.000164275	0.00288139	Pcif1	ENSMUSG00000039849
0.219373	9.72797e-07	3.64044e-05	Pik3cd	ENSMUSG00000039936
0.366747	9.99888e-13	1.72124e-10	Cbx4	ENSMUSG00000039989
0.168338	0.0122827	0.0842381	Tmem194	ENSMUSG00000040195
-0.923696	0.0113536	0.0795412	Zfp704	ENSMUSG00000040209
-0.140401	0.0216873	0.127541	Oaz2	ENSMUSG00000040652
-0.13882	0.000947219	0.0119518	Ttc3	ENSMUSG00000040785
-0.697764	0.00363601	0.034337	Rap1gap	ENSMUSG00000041351
-0.546984	0.0354712	0.179516	Coro2b	ENSMUSG00000041729
0.279999	0.0371119	0.18464	Fam222a	ENSMUSG00000041930
-0.644383	0.00116872	0.0143412	Slc35f2	ENSMUSG00000042195
0.129716	0.00718638	0.0571968	Setd1a	ENSMUSG00000042308
-1.87406	4.79567e-14	1.07014e-11	Reln	ENSMUSG00000042453
0.0929353	0.0156162	0.100324	Kdm7a	ENSMUSG00000042599
-1.16389	0.00035473	0.00536997	Synpo	ENSMUSG00000043079
-1.32649	3.34786e-08	2.01709e-06	Zc2hc1a	ENSMUSG00000043542
-0.838554	1.90517e-17	7.91632e-15	Slc36a4	ENSMUSG00000043885
-0.95336	1.56288e-08	1.00709e-06	Eml6	ENSMUSG00000044072
-0.616313	0.0064923	0.0532554	Dmd	ENSMUSG00000045103
0.0843664	0.0547374	0.235988	Zfp62	ENSMUSG00000046311
-0.73108	3.12954e-06	0.000101722	Bdh1	ENSMUSG00000046598
-1.21371	0.000131833	0.00238527	Mageh1	ENSMUSG00000047238
-0.576427	0.00815982	0.0626678	Cmya5	ENSMUSG00000047419
0.110717	0.0462339	0.213047	Samd9l	ENSMUSG00000047735
-0.697066	0.00644049	0.0528664	Sned1	ENSMUSG00000047793
0.2396	0.014006	0.092936	Cdca4	ENSMUSG00000047832
0.17714	0.0184103	0.113128	Bri3	ENSMUSG00000047843
-1.16279	0.00213593	0.0227992	Nat8l	ENSMUSG00000048142
-1.15933	4.38229e-24	3.7719e-21	Dip2c	ENSMUSG00000048264
0.239943	5.24081e-07	2.15511e-05	Syngr2	ENSMUSG00000048277
0.243016	0.000864686	0.0110845	Tob2	ENSMUSG00000048546
0.222755	0.0367853	0.183644	Cdk5r1	ENSMUSG00000048895
0.169648	0.000897981	0.0114747	Aff4	ENSMUSG00000049470
-0.287856	0.00404177	0.0370931	Zfpm1	ENSMUSG00000049577
-0.421401	0.0173152	0.108276	Gpr55	ENSMUSG00000049608
0.223369	0.000665023	0.00907219	Orai1	ENSMUSG00000049686
0.215183	0.000713757	0.00955747	Sertad2	ENSMUSG00000049800
-1.6675	3.25509e-12	4.90299e-10	Armcx4	ENSMUSG00000049804
0.303952	0.0223682	0.130463	Map10	ENSMUSG00000050930
-0.485609	5.94257e-07	2.38693e-05	Trim32	ENSMUSG00000051675
0.479967	1.16066e-05	0.000323204	Sox12	ENSMUSG00000051817
-0.465953	3.13184e-06	0.000101722	Erich1	ENSMUSG00000051978
-1.31011	6.17419e-28	9.29988e-25	Pard3b	ENSMUSG00000052062
-2.04754	1.97705e-09	1.63174e-07	B630019K06Rik	ENSMUSG00000052364
-0.301257	0.0140243	0.0930062	Oas1a	ENSMUSG00000052776
0.649241	4.71804e-12	7.01881e-10	Rnf157	ENSMUSG00000052949
0.162904	0.00370004	0.0348052	Cbx7	ENSMUSG00000053411
0.312618	0.000210082	0.00350137	Dusp7	ENSMUSG00000053716
-0.66383	9.80305e-05	0.00186442	Pde5a	ENSMUSG00000053965
-0.928486	6.95397e-08	3.64327e-06	Tusc1	ENSMUSG00000054000
-0.711101	0.00552398	0.0470505	Mgmt	ENSMUSG00000054612
0.25094	0.000528792	0.0075497	Nfic	ENSMUSG00000055053
-1.4158	1.17087e-07	5.59878e-06	Epm2a	ENSMUSG00000055493
-1.35044	1.3969e-07	6.52428e-06	Nap1l3	ENSMUSG00000055733
0.640528	0.00657278	0.0536599	Med12l	ENSMUSG00000056476
-0.698559	0.0528851	0.231262	Prelid2	ENSMUSG00000056671
0.31919	0.0438735	0.20579	Hist3h2ba	ENSMUSG00000056895
1.45771	3.29564e-10	3.42348e-08	Skap1	ENSMUSG00000057058
-0.170051	0.0146591	0.0960532	Eif1a	ENSMUSG00000057561
-0.117539	0.0345338	0.176226	Mdn1	ENSMUSG00000058006
-1.36356	5.37163e-06	0.000164285	Eda	ENSMUSG00000059327
-0.818503	5.17209e-15	1.38497e-12	Arhgef12	ENSMUSG00000059495
0.148088	0.038137	0.188032	Nrm	ENSMUSG00000059791
-0.172168	0.000369764	0.00554207	Eif4a1	ENSMUSG00000059796
0.374802	0.00198525	0.0215516	Dbp	ENSMUSG00000059824
0.422374	1.93393e-06	6.583e-05	Maml3	ENSMUSG00000061143
-0.200772	0.000357251	0.00539458	Stk19	ENSMUSG00000061207
-0.127649	0.0255364	0.141934	Exosc5	ENSMUSG00000061286
0.106424	0.0209934	0.12431	Qk	ENSMUSG00000062078
-0.107603	0.057116	0.242599	Btbd9	ENSMUSG00000062202
-0.577779	0.000983604	0.0123463	Phactr2	ENSMUSG00000062866
0.335018	0.00425683	0.0385096	Rab3ip	ENSMUSG00000064181
0.426653	0.0188248	0.114981	Vps37b	ENSMUSG00000066278
-0.273786	0.0158939	0.101549	Celsr2	ENSMUSG00000068740
0.139634	0.0068477	0.0551938	Fgfr1op	ENSMUSG00000069135
0.169234	0.000236754	0.00389207	Arid1b	ENSMUSG00000069729
-0.372836	0.011127	0.0785145	Tmem256	ENSMUSG00000070394
0.653258	0.000145067	0.00258207	Hs3st3b1	ENSMUSG00000070407
0.873922	1.81156e-16	5.89981e-14	Gad1	ENSMUSG00000070880
-0.459812	3.24902e-07	1.39326e-05	Zfp827	ENSMUSG00000071064
-0.37443	4.14131e-05	0.000929288	Naip5	ENSMUSG00000071203
-0.671601	0.000519783	0.00744755	3425401B19Rik	ENSMUSG00000071540
0.187698	0.000704228	0.00949211	Zhx2	ENSMUSG00000071757
-0.772665	6.60108e-05	0.00133911	Gprasp2	ENSMUSG00000072966
0.195183	0.000177084	0.00306589	H2-Ab1	ENSMUSG00000073421
-1.04826	9.3743e-05	0.0018018	Svip	ENSMUSG00000074093
-1.11803	0.00114689	0.0141164	Gramd2	ENSMUSG00000074259
-0.734239	0.00213558	0.0227992	Gm14296	ENSMUSG00000074527
0.288768	2.8122e-08	1.71924e-06	Zfp652	ENSMUSG00000075595
0.297297	0.000680331	0.00921122	Ass1	ENSMUSG00000076441
-0.569937	0.000548828	0.0077896	Zfp931	ENSMUSG00000078861
-0.383721	0.0110998	0.0784012	Gm14410	ENSMUSG00000078870
-0.455419	0.0448523	0.208999	Gm14435	ENSMUSG00000089951
-0.773465	0.000280047	0.00446372	Gm14399	ENSMUSG00000090093
-0.869608	4.12628e-09	3.22618e-07	Gm2237	ENSMUSG00000093979
0.23394	0.0334895	0.173048	Hist1h2ap	ENSMUSG00000094777
