# Supplementary material for: Leveraging the Mendelian disorders of the epigenetic machinery to systematically map functional epigenetic variation
Source: eLife journal article supplement (doi:10.7554/elife.65884), 2021-08-31
Supplement: supp [file elife-65884-supp-v1.zip › elife_poa_e65884_Figure_4_source_data_1.xlsx]

## Sheet: Figure_4_Supp_Table_1
gene_id	gene_name	logFC_KS1	logFC_KS2	significant_at_FDR_05
ENSMUSG00000000120	Ngfr	-0.5267515716671088	-0.45713476346225645	yes
ENSMUSG00000000552	Zfp385a	-1201391925274730	-0.41328990879782695	yes
ENSMUSG00000000594	Gm2a	-0.22033929892511714	-0.17396926291309364	no
ENSMUSG00000000673	Haao	-0.23078031406590324	-0.12941413056622578	no
ENSMUSG00000000791	Il12rb1	-2.31334e+16	-1.1482e+16	yes
ENSMUSG00000001025	S100a6	-0.7173626767606511	-0.2349210234525684	no
ENSMUSG00000001053	N4bp3	-0.581731967926854	-0.11714081884690912	no
ENSMUSG00000001281	Itgb7	-0.48154087434936577	-0.26428068947692696	yes
ENSMUSG00000001348	Acp5	-0.5167191121621201	-0.2629978556514533	yes
ENSMUSG00000002007	Srpk3	-0.20944337222295295	-0.10145156098183689	no
ENSMUSG00000002058	Unc119	-0.3890206366124007	-0.29069190646432475	yes
ENSMUSG00000003153	Slc2a3	0.6682562100289446	0.21432539877997528	yes
ENSMUSG00000003206	Ebi3	-1.13778e+16	-0.5666593221249243	yes
ENSMUSG00000003348	Mob3a	-0.3033688956124921	-0.19249435293527115	yes
ENSMUSG00000003382	Etv3	-0.36333179800340953	-0.15422186908802604	yes
ENSMUSG00000003452	Bicd1	1.02915e+16	1116491615529700	yes
ENSMUSG00000003484	Cyp4f18	-0.6156321313482445	-0.43582578986866677	yes
ENSMUSG00000003518	Dusp3	-0.5174505529291489	-0.26982413167547953	yes
ENSMUSG00000004952	Rasa4	-0.4616613950696251	-0.12481434947953375	no
ENSMUSG00000005125	Ndrg1	1.27728e+16	0.5855200581873827	yes
ENSMUSG00000005374	Tbl2	-0.35015175081556976	-0.149635861888347	yes
ENSMUSG00000005533	Igf1r	0.9042047821043984	1.08559e+16	yes
ENSMUSG00000005947	Itgae	-0.9384105766090125	-0.5083763336485229	yes
ENSMUSG00000006179	Prss16	-1.81285e+16	-1.11543e+16	no
ENSMUSG00000006360	Crip1	-0.274781687355271	-0.11537160001615049	yes
ENSMUSG00000006476	Nsmf	0.3143170294115017	0.19590075696067755	yes
ENSMUSG00000006731	B4galnt1	-0.21211074980624012	-0.2005991104323933	yes
ENSMUSG00000007035	Msh5	-0.4333705328396314	-0.3104833286036488	no
ENSMUSG00000007038	Neu1	-0.33649765768346385	-0.20279449017830206	yes
ENSMUSG00000007476	Lrrc8a	-0.6186836386574831	-0.21845818051205645	yes
ENSMUSG00000007817	Zmiz1	-0.32590031474756737	-0.08391885742942719	no
ENSMUSG00000007908	Hmgcll1	0.8012464123231058	0.4699739205335236	no
ENSMUSG00000008318	Relt	-0.8759422522913612	-0.36543096624971594	yes
ENSMUSG00000008730	Hipk1	-0.2138088401570588	-0.09384506826490803	no
ENSMUSG00000009292	Trpm2	-0.8155187973064981	-0.6443783686933086	yes
ENSMUSG00000009828	Ick	0.46604612396484857	0.21082155307720493	no
ENSMUSG00000011257	Pabpc4	0.1662386432771982	0.08203906035409672	no
ENSMUSG00000014686	Ceacam16	-0.5081864972167426	-0.21400071736245446	no
ENSMUSG00000015312	Gadd45b	-0.527936935933725	-0.16676165382903016	no
ENSMUSG00000015944	Gatsl2	0.6456328950066985	0.5083818243610854	yes
ENSMUSG00000015950	Ncf1	-0.33944786089681384	-0.20956492925099451	yes
ENSMUSG00000015968	Cacna1d	-0.8361364847619734	-0.4434584926745389	yes
ENSMUSG00000016194	Hsd11b1	-0.6161903450483243	-0.4613471305129023	yes
ENSMUSG00000016344	Ppdpf	-0.18750653243379653	-0.1257586014706349	yes
ENSMUSG00000016498	Pdcd1lg2	-0.48610135331795834	-0.25203222612445614	no
ENSMUSG00000017176	Nt5c3b	0.2878931937833562	0.16406254521583466	no
ENSMUSG00000017390	Aldoc	-0.7880129112592543	-0.2230100169987405	no
ENSMUSG00000017400	Stac2	-0.39718852132214966	-0.28832042761814947	yes
ENSMUSG00000017405	Nek8	-0.47391875518081583	-0.23121859962305732	yes
ENSMUSG00000017754	Pltp	-1.09109e+16	-0.30030278969946106	yes
ENSMUSG00000018008	Cyth4	-0.3689589697083303	-0.23570156186428198	yes
ENSMUSG00000018340	Anxa6	-0.2943896719688078	-0.2590747561850181	yes
ENSMUSG00000018381	Abi3	-0.39187034319008546	-0.10689448682673867	no
ENSMUSG00000018474	Chd3	0.22387423474444623	0.088337559086827	no
ENSMUSG00000019433	Gipc1	0.31080955500011986	0.20699565151944813	no
ENSMUSG00000019726	Lyst	-0.26302562268220686	-0.09350668554966696	yes
ENSMUSG00000019843	Fyn	0.36239181224330663	0.12539415225866432	no
ENSMUSG00000019982	Myb	0.8550987189113287	0.5012701325879081	yes
ENSMUSG00000020034	Tcp11l2	-0.30259573158923003	-0.29510808320905085	yes
ENSMUSG00000020063	Sirt1	-0.22307524459899625	-0.14786284267138214	no
ENSMUSG00000020101	4632428N05Rik	-0.3610702543766758	-0.21356013378559144	yes
ENSMUSG00000020227	Irak3	-0.5534029636568485	-0.22407729972932938	yes
ENSMUSG00000020279	Il9r	0.5768798451182521	0.40821395955039624	yes
ENSMUSG00000020282	Rhbdf1	0.35613203222853607	0.27713263493874585	no
ENSMUSG00000020571	Pdia6	0.24075812613704117	0.1050616263417547	no
ENSMUSG00000020620	Abca8b	1.7784e+16	0.6855484792805878	yes
ENSMUSG00000020642	Rnf144a	-0.23163192766972046	-0.3303931886567589	yes
ENSMUSG00000020701	Tmem132e	2.18083e+16	1.40577e+16	yes
ENSMUSG00000020733	Slc9a3r1	-0.23695388207624052	-0.10195921316374691	no
ENSMUSG00000020743	Mif4gd	-0.24535970262719814	-0.0911945636903341	yes
ENSMUSG00000020785	Camkk1	-0.9923429846768944	-0.6310302309311502	yes
ENSMUSG00000020846	Fam101b	0.42119471350188437	0.1506259355205618	yes
ENSMUSG00000020849	Ywhae	-0.2299376860624036	-0.08149766169800172	no
ENSMUSG00000020941	Map3k14	-0.2282579338602533	-0.15401030302501784	yes
ENSMUSG00000021068	Nin	-0.24297366860208894	-0.13604456131928888	yes
ENSMUSG00000021180	Rps6ka5	-0.5891035342884386	-0.437466930191047	yes
ENSMUSG00000021190	Lgmn	-0.32924840176880943	-0.08850411550217926	no
ENSMUSG00000021285	Ppp1r13b	-0.40308200497221736	-0.22921353643721298	yes
ENSMUSG00000021298	Gpr132	-0.2442208389389791	-0.5091822198295097	no
ENSMUSG00000021375	Kif13a	0.6551985496162127	0.6307657831873926	yes
ENSMUSG00000021384	Susd3	-0.47801525311745385	-0.11393368808171798	yes
ENSMUSG00000021411	Pxdc1	0.4097242706934382	0.29670602377694044	yes
ENSMUSG00000021552	Gkap1	1.15517e+16	0.6306696696438605	yes
ENSMUSG00000021556	Golm1	-0.5597142366937372	-0.138035350605859	no
ENSMUSG00000021608	Lpcat1	-0.19415184691392431	-0.1484265984670918	no
ENSMUSG00000021665	Hexb	-0.1812771856456717	-0.1062089015547642	no
ENSMUSG00000021702	Thbs4	1.836e+16	1.24448e+16	yes
ENSMUSG00000021830	Txndc16	-0.215830262557959	-0.17721465760551244	yes
ENSMUSG00000021959	Lats2	-0.173834482169587	-0.1630076753969736	no
ENSMUSG00000022114	Spry2	1.03584e+16	0.45101920735849865	yes
ENSMUSG00000022197	Pdzd2	0.77216226641517	0.220686722213321	yes
ENSMUSG00000022263	Trio	0.6840992615158628	0.18265043254633614	yes
ENSMUSG00000022265	Ank	0.4434597600655529	0.21907951952919533	yes
ENSMUSG00000022329	Stk3	0.5564079266307643	0.3752328070124799	no
ENSMUSG00000022353	Mtss1	0.21328838763921798	0.07177944093913521	no
ENSMUSG00000022436	Sh3bp1	-0.4080879074887404	-0.21746992694757075	yes
ENSMUSG00000022463	Srebf2	-0.2572740676931155	-0.08623582239344318	no
ENSMUSG00000022610	Mapk12	-0.47447837573982915	-0.26407786183745807	yes
ENSMUSG00000022636	Alcam	0.5499548793580402	0.33284475404746133	yes
ENSMUSG00000022661	Cd200	0.39639070908010143	0.38512626928185745	no
ENSMUSG00000022708	Zbtb20	0.24783559401771185	0.37654325280151757	yes
ENSMUSG00000022822	Abcc5	0.4049334216419745	0.25957356314076835	yes
ENSMUSG00000022876	Samsn1	0.3964665236705941	0.14109714026940823	no
ENSMUSG00000022885	St6gal1	0.20152615678885033	0.12201457995132861	yes
ENSMUSG00000022900	Ildr1	-0.6835728750876696	-0.9777082406871176	no
ENSMUSG00000022901	Cd86	-0.32413660276248013	-0.5580747868571089	no
ENSMUSG00000022952	Runx1	0.2011219784712415	0.08013341308405635	no
ENSMUSG00000023004	Tuba1b	-0.23534021239375152	-0.09200759067667941	no
ENSMUSG00000023243	Kcnk5	-1.0873e+16	-0.5916771219059207	yes
ENSMUSG00000023393	Slc17a9	-0.4014345311933582	-0.1615602389827303	no
ENSMUSG00000023973	Cnpy3	-0.22344003775793103	-0.13291524293999776	no
ENSMUSG00000024008	Cpne5	-0.43538864926030413	-0.43658917222640037	no
ENSMUSG00000024013	Fgd2	-0.27912964157710246	-0.18228572108581553	yes
ENSMUSG00000024109	Nrxn1	1.24717e+16	0.5611797884799671	no
ENSMUSG00000024169	Ift140	-0.2429389588551919	-0.16822470304861248	yes
ENSMUSG00000024300	Myo1f	-0.8497641938014898	-0.2957667840178768	yes
ENSMUSG00000024340	Btnl2	-0.4945842989649046	-0.2993782444140513	yes
ENSMUSG00000024456	Diap1	-0.14991167531431246	-0.1355530623607869	no
ENSMUSG00000024462	Gabbr1	0.5054600507755659	0.3641805624141559	yes
ENSMUSG00000024696	Lpxn	-0.25447862499022295	-0.10820820959711387	no
ENSMUSG00000024737	Slc15a3	-0.4747795051471487	-0.2522780236020414	yes
ENSMUSG00000024851	Pitpnm1	-0.1952619353170549	-0.1513750510982214	no
ENSMUSG00000024855	Pacs1	-0.24652174535255508	-0.2182076452348627	yes
ENSMUSG00000024937	Ehbp1l1	-0.21844001472703842	-0.10878518864828987	yes
ENSMUSG00000024978	Gpam	0.4280332579732648	0.23336112170350984	yes
ENSMUSG00000025151	Maged1	1.26626e+16	0.9678463889063578	yes
ENSMUSG00000025231	Sufu	-0.3802542276789374	-0.14702921490402646	yes
ENSMUSG00000025236	Adpgk	-2287094022497080	-1320130205536370	no
ENSMUSG00000025352	Gdf11	0.28752060467041046	0.2118581247250222	yes
ENSMUSG00000025366	Esyt1	-0.20355222785199067	-0.1265788283596536	yes
ENSMUSG00000025402	Nab2	-0.3938441313913844	-0.1894908290233028	no
ENSMUSG00000025572	Tmc6	-0.1826161582111772	-0.09553728194340906	no
ENSMUSG00000025574	Tk1	-0.7183280871676708	-0.22599191339712266	yes
ENSMUSG00000025754	Agbl1	0.713804103770485	0.4073069851927758	no
ENSMUSG00000025780	Itih5	-0.5568829786941462	-0.5797857518804982	yes
ENSMUSG00000025932	Eya1	1.01649e+16	0.6068231005794346	yes
ENSMUSG00000025949	Pikfyve	-0.20362590384019302	-0.1139465387080317	yes
ENSMUSG00000026011	Ctla4	0.9359803072996378	0.752472165191418	yes
ENSMUSG00000026170	Cyp27a1	-0.7484569908770031	-0.3085976409211726	yes
ENSMUSG00000026360	Rgs2	0.8728788779830371	0.2018248262131439	yes
ENSMUSG00000026425	Srgap2	0.39300622098311155	0.28921797686911027	yes
ENSMUSG00000026447	Pik3c2b	-0.16365409953813168	-0.06767836026083508	no
ENSMUSG00000026509	Capn2	0.36180689111205216	0.22058433784967615	yes
ENSMUSG00000026519	Tmem63a	-0.2955396164810235	-0.09133373318846033	no
ENSMUSG00000026576	Atp1b1	0.7548247243939883	0.3021727415295044	yes
ENSMUSG00000026594	Ralgps2	0.19794766779623452	0.13019669355463823	no
ENSMUSG00000026656	Fcgr2b	-0.20154098056733302	-0.09871173905546529	yes
ENSMUSG00000026663	Atf6	-0.2627900651757969	-0.11479964846767068	yes
ENSMUSG00000026866	Kynu	0.26050686107769816	0.13411210015782946	no
ENSMUSG00000026872	Zeb2	0.3791824602085753	0.26065781965694157	yes
ENSMUSG00000026942	Traf2	-0.23047786055758576	-0.12254576030122744	no
ENSMUSG00000026979	Psd4	-0.18545140092686427	-0.12348464526226445	no
ENSMUSG00000027009	Itga4	-0.18792517361164995	-0.20720804669298315	yes
ENSMUSG00000027035	Cers6	0.6168829076120523	0.20209000746686565	no
ENSMUSG00000027309	4930402H24Rik	0.27592547251791166	0.16430235227487397	no
ENSMUSG00000027330	Cdc25b	-0.5641948694231678	-0.31378841880142533	yes
ENSMUSG00000027423	Snx5	-0.16296861437026317	-0.1753868404682761	no
ENSMUSG00000027579	Srms	-0.8174603882695483	-0.5388036227439478	no
ENSMUSG00000027678	Ncoa3	-0.18976168825885897	-0.1885100483748794	yes
ENSMUSG00000027776	Il12a	0.7823015522910546	0.21265589955514488	yes
ENSMUSG00000027806	Tsc22d2	-0.3124276399170475	-0.2847290716732219	yes
ENSMUSG00000027947	Il6ra	-0.9224606655077685	-0.3883299782209256	yes
ENSMUSG00000028037	Ifi44	1.18231e+16	0.735008369098524	yes
ENSMUSG00000028060	2810403A07Rik	-0.3141425391895332	-0.14457208556167478	yes
ENSMUSG00000028159	Dapp1	-0.3957198005004357	-0.2650786897436655	yes
ENSMUSG00000028217	Cdh17	-1185191318750760	-0.5908085383040003	yes
ENSMUSG00000028268	Gbp3	-0.29959196139312316	-0.1267414438029779	no
ENSMUSG00000028381	Ugcg	0.3589889018535233	0.1485922194406065	yes
ENSMUSG00000028393	Alad	-0.37405074042203396	-0.1493063880666255	no
ENSMUSG00000028480	Glipr2	-0.44225879717537037	-0.4156868887464283	no
ENSMUSG00000028927	Padi2	-0.8170061547553534	-0.4376824435397248	yes
ENSMUSG00000029191	Rfc1	-1043084910840170	-0.40851155294732144	no
ENSMUSG00000029223	Uchl1	1.33606e+16	0.5635905733020696	no
ENSMUSG00000029299	Abcg3	-0.3530096671739548	-0.1605704004136087	no
ENSMUSG00000029338	Antxr2	0.7574419025088219	0.27057881480241397	yes
ENSMUSG00000029344	Tpst2	-0.532406724494358	-0.21966121227855329	yes
ENSMUSG00000029401	Rilpl2	-0.2909210787424051	-0.21340459237683498	no
ENSMUSG00000029406	Pitpnm2	-0.4093271416323238	-0.29663065259793436	yes
ENSMUSG00000029455	Aldh2	-0.4039205842843892	-0.1352360569907741	yes
ENSMUSG00000029705	Cux1	0.21878718225266439	0.06582035700667413	no
ENSMUSG00000029771	Irf5	-0.22390542510827321	-0.09551200852915709	yes
ENSMUSG00000029919	Hpgds	-0.7718789849957555	-0.3281443099834714	no
ENSMUSG00000030123	Plxnd1	-0.6767525934375644	-0.5828593008820595	yes
ENSMUSG00000030161	Gabarapl1	0.6805624913040541	0.2523877461417305	no
ENSMUSG00000030172	Erc1	0.5165079232645863	0.4105290040353516	yes
ENSMUSG00000030337	Vamp1	-0.3018481326345018	-0.10108510918407276	no
ENSMUSG00000030427	Lilra6	-0.9136540950168583	-0.8058342017364496	yes
ENSMUSG00000030629	Zfand6	0.31579048258202397	0.10764644101604155	no
ENSMUSG00000030630	Fah	0.7009286205613835	0.6199674021578826	yes
ENSMUSG00000030671	Pde3b	-0.30910192337681813	-0.26402698556818044	yes
ENSMUSG00000030761	Myo7a	-0.651301413505415	-0.16772007060571048	yes
ENSMUSG00000030798	Cd37	-0.1751374723698315	-0.18587470617952084	no
ENSMUSG00000030830	Itgal	-0.2404880371068392	-0.11970634124364114	yes
ENSMUSG00000031012	Cask	0.8025413373675006	0.7582860711388977	yes
ENSMUSG00000031239	Itm2a	1.10188e+16	0.530142286106789	yes
ENSMUSG00000031274	Col4a5	238071471890947	1.64507e+16	yes
ENSMUSG00000031327	Chic1	0.6304083519115967	0.5707149343301511	yes
ENSMUSG00000031328	Flna	-0.16426171988296775	-0.1462065936414931	yes
ENSMUSG00000031428	Zcchc18	-0.48211478499221566	-0.4418624723786302	yes
ENSMUSG00000031618	Nr3c2	1.40184e+16	0.7192014629917686	yes
ENSMUSG00000031633	Slc25a4	0.32669386592315763	0.28919484493973546	yes
ENSMUSG00000031662	Snx20	-0.456504094071473	-0.13587484161277383	yes
ENSMUSG00000031822	Gse1	-0.28043572691314317	-0.15659670012280516	yes
ENSMUSG00000031827	Cotl1	-0.2008295042871094	-0.16338420579334834	yes
ENSMUSG00000031939	Taf1d	-0.9426535882214904	-0.34064473681215746	no
ENSMUSG00000031951	Tmem231	1.25449e+16	1293935737870140	yes
ENSMUSG00000032028	Nxpe2	-0.6704117432953424	-0.18779732975199556	yes
ENSMUSG00000032089	Il10ra	-0.259621330829719	-0.19323788696026484	no
ENSMUSG00000032177	Pde4a	-0.9960554240691237	-0.3725270211185497	yes
ENSMUSG00000032216	Nedd4	0.5103321156627978	0.25705552176925234	yes
ENSMUSG00000032360	Hcrtr2	0.9427901070844793	0.7256399430292134	yes
ENSMUSG00000032369	Plscr1	0.7577023978275222	0.5465853617864931	no
ENSMUSG00000032402	Smad3	-0.3578799707920909	-0.13338590166398182	no
ENSMUSG00000032519	Slc25a38	-0.3645375991539021	-0.23895424629705303	yes
ENSMUSG00000032643	Fhl3	-0.7528799385343827	-0.5048658312032839	yes
ENSMUSG00000032737	Inppl1	0.2926077692686101	0.23038841771684154	no
ENSMUSG00000032740	Ccdc88a	0.6323624301107307	0.49126388868217463	yes
ENSMUSG00000032815	Fanca	-0.48905747913415853	-0.39766545297900563	yes
ENSMUSG00000032870	Smap2	-0.15772139330556023	-0.21654171184246085	yes
ENSMUSG00000033055	Ankrd54	-0.3068279399094329	-0.1448004091937616	no
ENSMUSG00000033365	Ipo13	-0.37664508123972745	-0.22047730320132736	yes
ENSMUSG00000033467	Crlf2	-0.26219976657319594	-0.1069356782687849	no
ENSMUSG00000033826	Dnah8	-0.43559184927084205	-0.36251046156178074	yes
ENSMUSG00000034006	Pqlc1	-0.3732378162710091	-0.23673841527506417	no
ENSMUSG00000034041	Lyl1	-0.30185916000406937	-0.10300661487387748	no
ENSMUSG00000034109	Golim4	0.47230377239140653	0.2112888998412311	yes
ENSMUSG00000034168	Irf2bpl	-0.6679751117750061	-0.3134602605846954	yes
ENSMUSG00000034177	Rnf43	0.9873825979765	0.9767067553832529	no
ENSMUSG00000034189	Hsdl1	-0.23670958685760718	-0.1391593192757465	no
ENSMUSG00000034247	Plekhm1	-0.20947842238029338	-0.11658802757458085	no
ENSMUSG00000034285	Nipsnap1	0.380023429214206	0.16473307548408517	no
ENSMUSG00000034612	Chst11	-1128152670187160	-1.06726e+16	yes
ENSMUSG00000034614	Pik3ip1	-0.36148698815950203	-0.19036597625557591	yes
ENSMUSG00000034751	Mast4	0.23084025140198236	0.16211267819930178	yes
ENSMUSG00000034761	Map4k5	-0.22979514075653698	-0.1939095013583191	no
ENSMUSG00000034792	Gna15	-0.8377059234108344	-0.3013373184645182	yes
ENSMUSG00000034807	Colgalt1	-0.19429873477793422	-0.16498693881455434	yes
ENSMUSG00000034902	Pip5k1c	-0.2952864240729294	-0.10847501852254066	yes
ENSMUSG00000035095	Fam167a	-0.32919437658029643	-0.187049514299043	no
ENSMUSG00000035215	Lsm7	0.4917493142283628	0.21199618190229585	no
ENSMUSG00000035329	Fbxo33	-0.24138589161796065	-0.12873852954893136	yes
ENSMUSG00000035354	Uvrag	-0.3374755109445166	-0.2650603927935792	yes
ENSMUSG00000035397	Klf16	-0.2984257993766511	-0.18938377686124142	yes
ENSMUSG00000035711	Dok3	-0.20162656683958557	-0.1279436009737285	yes
ENSMUSG00000035765	Dym	0.282591050320458	0.14926906689972314	no
ENSMUSG00000035900	Gramd4	-0.27052445663108	-0.1460749356936232	yes
ENSMUSG00000035919	Bbs9	-0.4368403897199474	-0.39904627468144643	yes
ENSMUSG00000036067	Slc2a6	-0.6001833682704079	-0.3267530093737575	yes
ENSMUSG00000036278	Macrod1	0.5207045438054079	0.21163737976632407	no
ENSMUSG00000036402	Gng12	0.6782921605547703	0.2560557637223888	no
ENSMUSG00000036452	Arhgap26	-0.2652618523789817	-0.22661963353322775	yes
ENSMUSG00000036526	Card11	-0.17403369562488966	-0.13431481821524136	no
ENSMUSG00000036528	Ppfibp2	-0.5033152738620931	-0.20960637098656154	yes
ENSMUSG00000036553	Sh3tc1	-0.5592058436598799	-0.18944520071391097	yes
ENSMUSG00000036591	Arhgap21	0.42478812397434684	0.21493845100683936	yes
ENSMUSG00000036599	Chst12	-0.33675046468295766	-0.10837160697480498	no
ENSMUSG00000037224	Zfyve28	-0.7076272083688435	-0.7071769508550565	no
ENSMUSG00000037280	Galnt6	-0.3275309641633286	-0.2679554985395526	yes
ENSMUSG00000037295	Ldlrap1	-0.5601678691307493	-0.31407805067797406	yes
ENSMUSG00000037410	Tbc1d2b	0.40452581819446026	0.2702589521020352	no
ENSMUSG00000037553	Zdhhc18	-0.1888750157880007	-0.09387156800851461	yes
ENSMUSG00000037731	Themis2	-0.3593780400939715	-0.21324643548003283	yes
ENSMUSG00000037788	Vopp1	0.5650039853186146	0.260385794147861	yes
ENSMUSG00000037855	Zfp365	1.90141e+16	1.35377e+16	yes
ENSMUSG00000037992	Rara	-0.361141707922307	-0.2255279789703289	yes
ENSMUSG00000038055	Dexi	0.39364713208197855	0.5113206161778373	yes
ENSMUSG00000038058	Nod1	-0.34356692762285834	-0.18426099612232674	yes
ENSMUSG00000038332	Sesn1	-0.3050112764121574	-0.24709676431881658	no
ENSMUSG00000038623	Tm6sf1	-0.22398132798522935	-0.0936525864030621	no
ENSMUSG00000038807	Rap1gap2	-1281643030831910	-0.6192889647721647	yes
ENSMUSG00000038884	A230050P20Rik	0.22793044097439993	0.12555817196183863	no
ENSMUSG00000038936	Sccpdh	0.6282706813712157	0.4664239298855611	no
ENSMUSG00000039157	Fam102a	-0.2974729302954303	-0.19826846886634447	yes
ENSMUSG00000039193	Nlrc4	-0.28349932082059925	-0.11540284247665661	no
ENSMUSG00000039270	Megf9	0.5709936318450207	0.41933246105225525	yes
ENSMUSG00000039457	Ppl	-1.02868e+16	-0.36752761969251	yes
ENSMUSG00000039621	Prex1	-0.4094901146255129	-0.22300638489057875	yes
ENSMUSG00000039637	Coro7	-0.3486014516368943	-0.19007799599875097	yes
ENSMUSG00000039713	Plekhg5	0.7947443580693514	0.5654584657843409	no
ENSMUSG00000039747	Orai2	-0.24892081539727834	-0.09042586399727676	no
ENSMUSG00000039783	Kmo	-0.21503587309187897	-0.2156686829862642	yes
ENSMUSG00000039849	Pcif1	-0.1716894326806797	-0.10086519238591352	no
ENSMUSG00000039953	Clstn1	0.9496721993505132	1.0771e+16	yes
ENSMUSG00000040111	Gramd1b	-0.5252219185558792	-0.24716420264935215	yes
ENSMUSG00000040327	Cul9	0.32173947834863065	0.3971683674725038	no
ENSMUSG00000040345	Arhgap9	-0.630961077844558	-0.18254941951838363	yes
ENSMUSG00000040415	Dtx3	0.38345272302682903	0.16690314631246952	yes
ENSMUSG00000040447	Spns2	-0.4236055769417209	-0.5373760577272934	yes
ENSMUSG00000040596	Pogk	0.6555803197477116	0.36201033194637483	yes
ENSMUSG00000041164	Zmiz2	-0.15690851175602052	-0.08508647730083416	no
ENSMUSG00000041538	H2-Ob	0.13631752848836814	0.0708166371457398	no
ENSMUSG00000041598	Cdc42ep4	-0.727424520024295	-0.2647003340029213	no
ENSMUSG00000041654	Slc39a11	1.02518e+16	0.4557981780232621	yes
ENSMUSG00000041757	Plekha6	-1.07654e+16	-1029578627994760	no
ENSMUSG00000041954	Tnfrsf18	-0.6207073712968826	-0.2704728284612731	yes
ENSMUSG00000042046	Dstyk	-0.2938016995035661	-0.161585723843265	yes
ENSMUSG00000042453	Reln	1.60381e+16	0.942773696555476	yes
ENSMUSG00000042500	Ago4	-0.5136411671521818	-0.2578238818169095	yes
ENSMUSG00000042524	Sun2	-0.2130207946122161	-0.07948483459965364	yes
ENSMUSG00000042594	Sh2b3	-0.17924244800520858	-0.1210570427130116	no
ENSMUSG00000042708	Shcbp1l	-0.7812044829665971	-0.6023089433972196	yes
ENSMUSG00000042766	Trim46	-0.8881174482078334	-0.3586674085797003	yes
ENSMUSG00000043102	Qrfp	-0.7695682030155888	-0.29961027511755467	no
ENSMUSG00000043384	Gprasp1	0.32409501231853655	0.18797132433266112	yes
ENSMUSG00000043592	Unc5cl	-1.05267e+16	-0.30899167591968096	yes
ENSMUSG00000043832	Clec4a3	0.8316386400179887	0.6560366309145146	no
ENSMUSG00000043885	Slc36a4	0.8480111550427072	0.4492924074192068	yes
ENSMUSG00000044156	Hepacam2	-0.5603016352333313	-0.6243731851103921	yes
ENSMUSG00000044197	Gpr146	-0.45543054823468054	-0.15296600171915078	yes
ENSMUSG00000044348	Slc25a53	-0.27748121254207053	-0.13597230314705014	no
ENSMUSG00000044770	Scml4	-0.2832437009043377	-0.17711819586547944	yes
ENSMUSG00000045103	Dmd	10449477883342	0.9633983658528035	no
ENSMUSG00000045231	BC106179	0.693064952054882	0.3485935902447227	yes
ENSMUSG00000045969	Ing1	-0.3253040200518945	-0.15657405034105337	yes
ENSMUSG00000046169	Adamts6	0.3977305796479452	0.12558390575683298	no
ENSMUSG00000046329	Slc25a23	0.4483252861320785	0.2514794161082897	yes
ENSMUSG00000046417	Lrrc75a	-1.06618e+16	-0.3857343618109082	yes
ENSMUSG00000046432	Ngfrap1	0.4827827825956039	0.3156978658485272	no
ENSMUSG00000046841	Ckap4	-0.28147891685373194	-0.45926959527686056	no
ENSMUSG00000047146	Tet1	0.7130061704322224	0.650810357038134	no
ENSMUSG00000047180	Neurl3	-0.2192717973782351	-0.2528283341941937	yes
ENSMUSG00000047368	Abhd17b	0.2950468635449685	0.11907489861395859	yes
ENSMUSG00000047810	Ccdc88b	-0.4062750130947728	-0.31780517370864825	no
ENSMUSG00000048264	Dip2c	1.12036e+16	0.8395350437262598	yes
ENSMUSG00000048612	Myof	-0.7462623467576466	-0.6018226603246679	yes
ENSMUSG00000048756	Foxo3	-0.17508146059805604	-0.16530869177386198	no
ENSMUSG00000048865	Arhgap30	-0.15909180889386895	-0.10815671835921802	no
ENSMUSG00000049588	Ccdc69	-0.41394175745570794	-0.2713297397825793	yes
ENSMUSG00000050022	Amz1	-1313566079864160	-0.727725710802564	yes
ENSMUSG00000050822	Slc29a4	0.8247218315514686	0.47117019105066893	yes
ENSMUSG00000051079	Rgs13	2102433680504980	2.03335e+16	yes
ENSMUSG00000051243	Islr2	-1.2368e+16	-0.8692153444255398	yes
ENSMUSG00000051278	Zgrf1	-1.26767e+16	-0.4557436321967039	no
ENSMUSG00000051344	Plekhm3	-0.35227369734345004	-0.1933521696806793	yes
ENSMUSG00000051998	Lax1	-0.4194391923237028	-0.20614094939626224	yes
ENSMUSG00000052062	Pard3b	1.34882e+16	0.35856285883503214	yes
ENSMUSG00000052087	Rgs14	-0.30368063454524996	-0.1139601785401267	yes
ENSMUSG00000052160	Pld4	-0.5155940972836446	-0.22596919806456792	yes
ENSMUSG00000052428	Tmco1	-0.9638385435958111	-0.3175020666981983	no
ENSMUSG00000052534	Pbx1	0.5035224182130805	0.3839485207862711	yes
ENSMUSG00000052539	Magi3	0.5173093613653715	0.22382258465284982	no
ENSMUSG00000052609	Plekhg3	-0.61821604496718	-0.6373219324779678	yes
ENSMUSG00000052949	Rnf157	-0.6443737235557214	-0.29526825274728824	yes
ENSMUSG00000053063	Clec12a	-0.6778781396268708	-0.5651008017781922	yes
ENSMUSG00000053175	Bcl3	-0.3653608449655267	-0.2580797195804586	yes
ENSMUSG00000053559	Smagp	-0.7280841317717205	-0.474416617076006	yes
ENSMUSG00000053580	Tanc2	0.6849367749074685	0.5842623447539573	yes
ENSMUSG00000054008	Ndst1	-0.5442423700617958	-0.254806029580329	yes
ENSMUSG00000054428	Atpif1	0.3187382576351971	0.198979913284826	no
ENSMUSG00000054499	Dedd2	-0.4745461773853411	-0.5016319237857491	yes
ENSMUSG00000055044	Pdlim1	-0.32214914516019044	-0.13411137931463124	yes
ENSMUSG00000055493	Epm2a	1.21068e+16	0.9495454390344776	no
ENSMUSG00000056220	Pla2g4a	1.20499e+16	1.1654e+16	no
ENSMUSG00000056413	Adap1	-0.8656562958539743	-0.2816570959507362	yes
ENSMUSG00000056724	Nbeal2	-0.41556418737709455	-0.10567281823581566	no
ENSMUSG00000057135	Scimp	-1040757486071890	-0.5656506428047757	yes
ENSMUSG00000057963	Itpk1	-0.37418024484491036	-0.23247745176509077	yes
ENSMUSG00000058099	Nfam1	-0.6136124600332732	-0.22801444962276082	yes
ENSMUSG00000058587	Tmod3	-0.23682033902246102	-0.22064511859212818	yes
ENSMUSG00000059013	Sh2d3c	-0.25264367409407196	-0.13172128261251131	yes
ENSMUSG00000059248	2009-09-01	-0.6699972027245604	-0.317001048942954	yes
ENSMUSG00000059495	Arhgef12	0.6651748033855578	0.7240178740967543	yes
ENSMUSG00000059994	Fcrl1	-0.2391272517158737	-0.10147485596072488	yes
ENSMUSG00000061311	Rag1	1.41916e+16	1.44482e+16	yes
ENSMUSG00000061436	Hipk2	-0.38569369029906564	-0.186537703588946	yes
ENSMUSG00000062939	Stat4	-0.31466636080443655	-0.2063437962647482	yes
ENSMUSG00000063972	Nr6a1	1044722037873310	0.6133043909541348	yes
ENSMUSG00000064267	Hvcn1	0.34769782209970646	0.19167524408734676	no
ENSMUSG00000068105	Tnfrsf13c	-0.24365353259394043	-0.19094129482074243	yes
ENSMUSG00000068220	Lgals1	-1.03956e+16	-0.24762000203126863	yes
ENSMUSG00000068284	Gm608	-0.1917199397852229	-0.11337944534664611	no
ENSMUSG00000069094	Pde7a	-0.23159476724365957	-0.17363595926876166	no
ENSMUSG00000071064	Zfp827	0.6537221144804084	0.5906340618810778	yes
ENSMUSG00000071072	Ptges3	-0.29359745027992734	-0.17250143331907689	no
ENSMUSG00000071647	Eml3	-0.21107872227308244	-0.07438722467145187	no
ENSMUSG00000073002	Vamp5	-0.7711127507615431	-0.23004440146665436	no
ENSMUSG00000073490	AI607873	1.22206e+16	1.09728e+16	yes
ENSMUSG00000073491	Pydc4	0.3261236937937605	0.25045614831369417	yes
ENSMUSG00000073643	Wdfy1	-0.24670529687698717	-0.20516660723525446	no
ENSMUSG00000074063	Osgin1	-1.017e+16	-0.4991324842400197	no
ENSMUSG00000074682	Zcchc3	0.8446996925668535	0.8654656726694994	no
ENSMUSG00000075254	Heg1	-0.24507268556323805	-0.12959261525767374	yes
ENSMUSG00000075289	Carns1	-0.31783264866072486	-0.23982273081617211	yes
ENSMUSG00000075595	Zfp652	-0.17637161895054448	-0.08305934436379402	no
ENSMUSG00000076431	Sox4	0.7241621978686943	0.48512957453358513	yes
ENSMUSG00000076939	character(0)	0.3374689733853191	0.19268347225924953	no
ENSMUSG00000078922	Tgtp1	-0.9381072721333398	-0.3459020828896774	no
ENSMUSG00000079017	Ifi27l2a	0.3049395281875752	0.2733064655369207	no
ENSMUSG00000089942	Pira2	-0.4677186860616567	-0.42113472928079987	no
ENSMUSG00000090272	Mndal	0.19166720701604492	0.11403057770276968	no
ENSMUSG00000093954	Gm28049	-0.6036053586783834	-0.42730829038197093	yes
ENSMUSG00000094951	character(0)	0.704463173457377	0.24399093406972175	no
ENSMUSG00000095571	character(0)	0.40748597362157146	0.19932697914243172	yes
ENSMUSG00000095612	character(0)	0.458600908107132	0.16704053921170203	no
ENSMUSG00000098112	Bin2	-0.20331027533953855	-0.13465083034941658	yes
ENSMUSG00000098950	Gm28036	-0.35739399732582283	-0.31917895327867407	yes
ENSMUSG00000099241	character(0)	-1.22157e+16	-0.5646585325203941	yes
