# Supplementary material for: Leveraging the Mendelian disorders of the epigenetic machinery to systematically map functional epigenetic variation
Source: eLife journal article supplement (doi:10.7554/elife.65884), 2021-08-31
Supplement: supp [file elife-65884-supp-v1.zip › elife_poa_e65884_Figure_4_source_data_2.xlsx]

## Sheet: Figure_4_Supp_Table_2
gene_id	gene_name	logFC_KS1	logFC_KS2	logFC_RT	significant_at_FDR_05
ENSMUSG00000000120	Ngfr	-0.5267515716671088	-0.45713476346225645	-0.33399701620399685	yes
ENSMUSG00000000552	Zfp385a	-1201391925274730	-0.41328990879782695	-0.6279946014436717	yes
ENSMUSG00000000594	Gm2a	-0.22033929892511714	-0.17396926291309364	-0.20208799915233408	no
ENSMUSG00000000673	Haao	-0.23078031406590324	-0.12941413056622578	-0.27368105883312005	no
ENSMUSG00000002007	Srpk3	-0.20944337222295295	-0.10145156098183689	-0.17767130659226804	no
ENSMUSG00000002058	Unc119	-0.3890206366124007	-0.29069190646432475	-0.07882861516513508	no
ENSMUSG00000003206	Ebi3	-1.13778e+16	-0.5666593221249243	-0.28975391752953483	yes
ENSMUSG00000003348	Mob3a	-0.3033688956124921	-0.19249435293527115	-0.11451998040782294	yes
ENSMUSG00000003382	Etv3	-0.36333179800340953	-0.15422186908802604	-0.16481010642974303	yes
ENSMUSG00000003452	Bicd1	1.02915e+16	1116491615529700	1364423920391910	yes
ENSMUSG00000003484	Cyp4f18	-0.6156321313482445	-0.43582578986866677	-0.11326792610983458	yes
ENSMUSG00000003518	Dusp3	-0.5174505529291489	-0.26982413167547953	-0.45979181609543046	yes
ENSMUSG00000004952	Rasa4	-0.4616613950696251	-0.12481434947953375	-0.2877083798781658	no
ENSMUSG00000005125	Ndrg1	1.27728e+16	0.5855200581873827	0.43659492973001124	yes
ENSMUSG00000005533	Igf1r	0.9042047821043984	1.08559e+16	0.19050622915574605	no
ENSMUSG00000006179	Prss16	-1.81285e+16	-1.11543e+16	-1420490426831150	no
ENSMUSG00000006476	Nsmf	0.3143170294115017	0.19590075696067755	0.2624749462202909	yes
ENSMUSG00000006731	B4galnt1	-0.21211074980624012	-0.2005991104323933	-0.261119199064191	yes
ENSMUSG00000007035	Msh5	-0.4333705328396314	-0.3104833286036488	-0.3746750860353918	no
ENSMUSG00000007038	Neu1	-0.33649765768346385	-0.20279449017830206	-0.28602656418322936	yes
ENSMUSG00000007476	Lrrc8a	-0.6186836386574831	-0.21845818051205645	-0.25743517053823284	yes
ENSMUSG00000007908	Hmgcll1	0.8012464123231058	0.4699739205335236	0.4194817111557522	no
ENSMUSG00000008318	Relt	-0.8759422522913612	-0.36543096624971594	-0.08277294220581025	no
ENSMUSG00000008730	Hipk1	-0.2138088401570588	-0.09384506826490803	-0.21881769267612042	no
ENSMUSG00000009292	Trpm2	-0.8155187973064981	-0.6443783686933086	-0.4344680924294549	yes
ENSMUSG00000009828	Ick	0.46604612396484857	0.21082155307720493	0.13804623862632937	no
ENSMUSG00000011257	Pabpc4	0.1662386432771982	0.08203906035409672	0.1159088270353548	no
ENSMUSG00000014686	Ceacam16	-0.5081864972167426	-0.21400071736245446	-0.834510248507946	no
ENSMUSG00000015312	Gadd45b	-0.527936935933725	-0.16676165382903016	-0.3827669108705227	no
ENSMUSG00000015944	Gatsl2	0.6456328950066985	0.5083818243610854	0.22367406872324372	yes
ENSMUSG00000015950	Ncf1	-0.33944786089681384	-0.20956492925099451	-0.04273085228600916	no
ENSMUSG00000016194	Hsd11b1	-0.6161903450483243	-0.4613471305129023	-0.44588589841906245	yes
ENSMUSG00000016344	Ppdpf	-0.18750653243379653	-0.1257586014706349	-0.08359613421046785	no
ENSMUSG00000016498	Pdcd1lg2	-0.48610135331795834	-0.25203222612445614	-0.35447167011451935	no
ENSMUSG00000017176	Nt5c3b	0.2878931937833562	0.16406254521583466	0.15513913321323977	no
ENSMUSG00000017405	Nek8	-0.47391875518081583	-0.23121859962305732	-0.3649391398022915	yes
ENSMUSG00000018008	Cyth4	-0.3689589697083303	-0.23570156186428198	-0.09568716792779092	yes
ENSMUSG00000018381	Abi3	-0.39187034319008546	-0.10689448682673867	-0.21987705543336042	no
ENSMUSG00000019433	Gipc1	0.31080955500011986	0.20699565151944813	0.11744624747449474	no
ENSMUSG00000019726	Lyst	-0.26302562268220686	-0.09350668554966696	-0.24098631118030198	yes
ENSMUSG00000020034	Tcp11l2	-0.30259573158923003	-0.29510808320905085	-0.15652323411406077	yes
ENSMUSG00000020063	Sirt1	-0.22307524459899625	-0.14786284267138214	-0.11168798142598763	no
ENSMUSG00000020227	Irak3	-0.5534029636568485	-0.22407729972932938	-0.2241907066290938	yes
ENSMUSG00000020571	Pdia6	0.24075812613704117	0.1050616263417547	0.07028531922372266	no
ENSMUSG00000020642	Rnf144a	-0.23163192766972046	-0.3303931886567589	-0.36205319560162486	yes
ENSMUSG00000020701	Tmem132e	2.18083e+16	1.40577e+16	1.80405e+16	yes
ENSMUSG00000020743	Mif4gd	-0.24535970262719814	-0.0911945636903341	-0.08166494262863118	yes
ENSMUSG00000020846	Fam101b	0.42119471350188437	0.1506259355205618	0.08039781153887333	no
ENSMUSG00000020941	Map3k14	-0.2282579338602533	-0.15401030302501784	-0.2642050614006422	yes
ENSMUSG00000021180	Rps6ka5	-0.5891035342884386	-0.437466930191047	-0.48255893062597294	yes
ENSMUSG00000021190	Lgmn	-0.32924840176880943	-0.08850411550217926	-0.17586106431623483	no
ENSMUSG00000021285	Ppp1r13b	-0.40308200497221736	-0.22921353643721298	-0.19975179706783294	yes
ENSMUSG00000021298	Gpr132	-0.2442208389389791	-0.5091822198295097	-0.6364366793125463	no
ENSMUSG00000021375	Kif13a	0.6551985496162127	0.6307657831873926	1.13468e+16	yes
ENSMUSG00000021384	Susd3	-0.47801525311745385	-0.11393368808171798	-0.22785742247351035	yes
ENSMUSG00000021552	Gkap1	1.15517e+16	0.6306696696438605	1.00767e+16	yes
ENSMUSG00000021608	Lpcat1	-0.19415184691392431	-0.1484265984670918	-0.17333787734738937	no
ENSMUSG00000021665	Hexb	-0.1812771856456717	-0.1062089015547642	-0.1856379067244262	no
ENSMUSG00000021702	Thbs4	1.836e+16	1.24448e+16	2145634731964960	yes
ENSMUSG00000021830	Txndc16	-0.215830262557959	-0.17721465760551244	-0.0987459627203452	yes
ENSMUSG00000021959	Lats2	-0.173834482169587	-0.1630076753969736	-0.2326104198614837	no
ENSMUSG00000022114	Spry2	1.03584e+16	0.45101920735849865	0.5107786023168299	yes
ENSMUSG00000022197	Pdzd2	0.77216226641517	0.220686722213321	0.25962207600563825	yes
ENSMUSG00000022329	Stk3	0.5564079266307643	0.3752328070124799	0.44266163539780246	no
ENSMUSG00000022353	Mtss1	0.21328838763921798	0.07177944093913521	0.07132055953440553	no
ENSMUSG00000022436	Sh3bp1	-0.4080879074887404	-0.21746992694757075	-0.30203881293262813	yes
ENSMUSG00000022463	Srebf2	-0.2572740676931155	-0.08623582239344318	-0.08995583960740668	no
ENSMUSG00000022708	Zbtb20	0.24783559401771185	0.37654325280151757	0.261249898839451	yes
ENSMUSG00000022822	Abcc5	0.4049334216419745	0.25957356314076835	0.32589764600085147	yes
ENSMUSG00000023004	Tuba1b	-0.23534021239375152	-0.09200759067667941	-0.061391733945623514	no
ENSMUSG00000023243	Kcnk5	-1.0873e+16	-0.5916771219059207	-0.4545667586590989	yes
ENSMUSG00000023973	Cnpy3	-0.22344003775793103	-0.13291524293999776	-0.1142057871204941	no
ENSMUSG00000024008	Cpne5	-0.43538864926030413	-0.43658917222640037	-0.15319522219464018	no
ENSMUSG00000024169	Ift140	-0.2429389588551919	-0.16822470304861248	-0.10434073260839241	yes
ENSMUSG00000024300	Myo1f	-0.8497641938014898	-0.2957667840178768	-0.4512042806715861	yes
ENSMUSG00000024340	Btnl2	-0.4945842989649046	-0.2993782444140513	-0.2849024963964598	yes
ENSMUSG00000024456	Diap1	-0.14991167531431246	-0.1355530623607869	-0.10098058028266414	no
ENSMUSG00000024462	Gabbr1	0.5054600507755659	0.3641805624141559	0.304970550446679	yes
ENSMUSG00000024851	Pitpnm1	-0.1952619353170549	-0.1513750510982214	-0.14438421920586458	no
ENSMUSG00000024855	Pacs1	-0.24652174535255508	-0.2182076452348627	-0.153646856118828	yes
ENSMUSG00000024978	Gpam	0.4280332579732648	0.23336112170350984	0.18483873328783107	yes
ENSMUSG00000025151	Maged1	1.26626e+16	0.9678463889063578	1.97835e+16	yes
ENSMUSG00000025231	Sufu	-0.3802542276789374	-0.14702921490402646	-0.2022374134643711	yes
ENSMUSG00000025402	Nab2	-0.3938441313913844	-0.1894908290233028	-0.5181123183345995	no
ENSMUSG00000025574	Tk1	-0.7183280871676708	-0.22599191339712266	-0.26970190212271966	yes
ENSMUSG00000025754	Agbl1	0.713804103770485	0.4073069851927758	1501807897740640	no
ENSMUSG00000025780	Itih5	-0.5568829786941462	-0.5797857518804982	-0.6815287449711419	yes
ENSMUSG00000025932	Eya1	1.01649e+16	0.6068231005794346	0.3776595400300998	yes
ENSMUSG00000025949	Pikfyve	-0.20362590384019302	-0.1139465387080317	-0.061893013500208593	yes
ENSMUSG00000026011	Ctla4	0.9359803072996378	0.752472165191418	0.6848059373458953	yes
ENSMUSG00000026170	Cyp27a1	-0.7484569908770031	-0.3085976409211726	-0.7701908371935954	yes
ENSMUSG00000026425	Srgap2	0.39300622098311155	0.28921797686911027	0.12855330755632788	yes
ENSMUSG00000026509	Capn2	0.36180689111205216	0.22058433784967615	0.5462450595458896	yes
ENSMUSG00000026576	Atp1b1	0.7548247243939883	0.3021727415295044	0.3020319967264614	yes
ENSMUSG00000026663	Atf6	-0.2627900651757969	-0.11479964846767068	-0.07050038819886797	yes
ENSMUSG00000026872	Zeb2	0.3791824602085753	0.26065781965694157	0.15584332357129105	yes
ENSMUSG00000026942	Traf2	-0.23047786055758576	-0.12254576030122744	-0.1659473209138619	no
ENSMUSG00000026979	Psd4	-0.18545140092686427	-0.12348464526226445	-0.10584518517668658	no
ENSMUSG00000027009	Itga4	-0.18792517361164995	-0.20720804669298315	-0.1507239338594845	yes
ENSMUSG00000027035	Cers6	0.6168829076120523	0.20209000746686565	0.3378390506476594	no
ENSMUSG00000027309	4930402H24Rik	0.27592547251791166	0.16430235227487397	0.19789756985320395	no
ENSMUSG00000027330	Cdc25b	-0.5641948694231678	-0.31378841880142533	-0.20666727382547867	yes
ENSMUSG00000027423	Snx5	-0.16296861437026317	-0.1753868404682761	-0.26849859955383654	no
ENSMUSG00000027579	Srms	-0.8174603882695483	-0.5388036227439478	-0.1985798236551039	no
ENSMUSG00000027678	Ncoa3	-0.18976168825885897	-0.1885100483748794	-0.16240020267571914	yes
ENSMUSG00000027806	Tsc22d2	-0.3124276399170475	-0.2847290716732219	-0.08606399006830691	no
ENSMUSG00000027947	Il6ra	-0.9224606655077685	-0.3883299782209256	-0.5129687373599363	yes
ENSMUSG00000028037	Ifi44	1.18231e+16	0.735008369098524	0.6562526262358428	yes
ENSMUSG00000028159	Dapp1	-0.3957198005004357	-0.2650786897436655	-0.19331946699302913	yes
ENSMUSG00000028393	Alad	-0.37405074042203396	-0.1493063880666255	-0.23774156596295454	no
ENSMUSG00000028480	Glipr2	-0.44225879717537037	-0.4156868887464283	-0.27235792552951027	no
ENSMUSG00000028927	Padi2	-0.8170061547553534	-0.4376824435397248	-0.6738975340063947	yes
ENSMUSG00000029223	Uchl1	1.33606e+16	0.5635905733020696	0.68628059044989	no
ENSMUSG00000029338	Antxr2	0.7574419025088219	0.27057881480241397	0.11000990217660585	yes
ENSMUSG00000029344	Tpst2	-0.532406724494358	-0.21966121227855329	-0.3365371279641603	yes
ENSMUSG00000029401	Rilpl2	-0.2909210787424051	-0.21340459237683498	-0.1526888662128234	no
ENSMUSG00000029455	Aldh2	-0.4039205842843892	-0.1352360569907741	-0.19338354570239316	yes
ENSMUSG00000029771	Irf5	-0.22390542510827321	-0.09551200852915709	-0.08657575118450977	yes
ENSMUSG00000029919	Hpgds	-0.7718789849957555	-0.3281443099834714	-0.8975103472050737	no
ENSMUSG00000030161	Gabarapl1	0.6805624913040541	0.2523877461417305	0.4492522288070699	no
ENSMUSG00000030172	Erc1	0.5165079232645863	0.4105290040353516	0.19251740597370917	yes
ENSMUSG00000030427	Lilra6	-0.9136540950168583	-0.8058342017364496	-0.68440341094832	yes
ENSMUSG00000030630	Fah	0.7009286205613835	0.6199674021578826	0.6156916873522462	yes
ENSMUSG00000031012	Cask	0.8025413373675006	0.7582860711388977	0.8413676626920638	yes
ENSMUSG00000031239	Itm2a	1.10188e+16	0.530142286106789	0.8173050466029941	yes
ENSMUSG00000031274	Col4a5	238071471890947	1.64507e+16	1.30667e+16	yes
ENSMUSG00000031327	Chic1	0.6304083519115967	0.5707149343301511	0.28435957171063486	yes
ENSMUSG00000031328	Flna	-0.16426171988296775	-0.1462065936414931	-0.061873271716124764	no
ENSMUSG00000031428	Zcchc18	-0.48211478499221566	-0.4418624723786302	-0.10509775194369968	yes
ENSMUSG00000031618	Nr3c2	1.40184e+16	0.7192014629917686	1.20129e+16	yes
ENSMUSG00000031633	Slc25a4	0.32669386592315763	0.28919484493973546	0.4941766615720718	yes
ENSMUSG00000031662	Snx20	-0.456504094071473	-0.13587484161277383	-0.10405874853786097	no
ENSMUSG00000031822	Gse1	-0.28043572691314317	-0.15659670012280516	-0.16125661666276336	yes
ENSMUSG00000031827	Cotl1	-0.2008295042871094	-0.16338420579334834	-0.10115785247082781	yes
ENSMUSG00000032028	Nxpe2	-0.6704117432953424	-0.18779732975199556	-0.6010771192574698	yes
ENSMUSG00000032089	Il10ra	-0.259621330829719	-0.19323788696026484	-0.34029205519007044	no
ENSMUSG00000032216	Nedd4	0.5103321156627978	0.25705552176925234	0.6347672805146862	yes
ENSMUSG00000032360	Hcrtr2	0.9427901070844793	0.7256399430292134	0.4105392804277432	yes
ENSMUSG00000032369	Plscr1	0.7577023978275222	0.5465853617864931	0.5600658989944033	no
ENSMUSG00000032402	Smad3	-0.3578799707920909	-0.13338590166398182	-0.317903606035541	no
ENSMUSG00000032643	Fhl3	-0.7528799385343827	-0.5048658312032839	-0.5797514141473326	yes
ENSMUSG00000032737	Inppl1	0.2926077692686101	0.23038841771684154	0.5441226382874391	no
ENSMUSG00000032740	Ccdc88a	0.6323624301107307	0.49126388868217463	0.5623811755729864	yes
ENSMUSG00000032870	Smap2	-0.15772139330556023	-0.21654171184246085	-0.20016551181817227	yes
ENSMUSG00000033365	Ipo13	-0.37664508123972745	-0.22047730320132736	-0.3213377946621862	yes
ENSMUSG00000033467	Crlf2	-0.26219976657319594	-0.1069356782687849	-0.1672121438236266	no
ENSMUSG00000034041	Lyl1	-0.30185916000406937	-0.10300661487387748	-0.18796435800479983	no
ENSMUSG00000034109	Golim4	0.47230377239140653	0.2112888998412311	0.621458613959859	yes
ENSMUSG00000034168	Irf2bpl	-0.6679751117750061	-0.3134602605846954	-0.7388954165308775	yes
ENSMUSG00000034247	Plekhm1	-0.20947842238029338	-0.11658802757458085	-0.18321266244036016	no
ENSMUSG00000034285	Nipsnap1	0.380023429214206	0.16473307548408517	0.102995955576079	no
ENSMUSG00000034614	Pik3ip1	-0.36148698815950203	-0.19036597625557591	-0.10506101336175681	yes
ENSMUSG00000034792	Gna15	-0.8377059234108344	-0.3013373184645182	-0.7849578864249848	yes
ENSMUSG00000034902	Pip5k1c	-0.2952864240729294	-0.10847501852254066	-0.23122162668322585	yes
ENSMUSG00000035095	Fam167a	-0.32919437658029643	-0.187049514299043	-0.6837638134976763	no
ENSMUSG00000035215	Lsm7	0.4917493142283628	0.21199618190229585	0.1619897822415565	no
ENSMUSG00000035329	Fbxo33	-0.24138589161796065	-0.12873852954893136	-0.09366431375232998	yes
ENSMUSG00000035354	Uvrag	-0.3374755109445166	-0.2650603927935792	-0.14020210682557022	yes
ENSMUSG00000035900	Gramd4	-0.27052445663108	-0.1460749356936232	-0.12231655783290403	yes
ENSMUSG00000035919	Bbs9	-0.4368403897199474	-0.39904627468144643	-0.053549408577957314	no
ENSMUSG00000036067	Slc2a6	-0.6001833682704079	-0.3267530093737575	-0.18115125717854244	yes
ENSMUSG00000036452	Arhgap26	-0.2652618523789817	-0.22661963353322775	-0.2124881878977465	yes
ENSMUSG00000036526	Card11	-0.17403369562488966	-0.13431481821524136	-0.15398339037747955	no
ENSMUSG00000036528	Ppfibp2	-0.5033152738620931	-0.20960637098656154	-0.5255162574886341	yes
ENSMUSG00000036553	Sh3tc1	-0.5592058436598799	-0.18944520071391097	-0.23525357311810682	yes
ENSMUSG00000036591	Arhgap21	0.42478812397434684	0.21493845100683936	0.31764751182326195	yes
ENSMUSG00000036599	Chst12	-0.33675046468295766	-0.10837160697480498	-0.29055352863145356	no
ENSMUSG00000037280	Galnt6	-0.3275309641633286	-0.2679554985395526	-0.6696635108268925	yes
ENSMUSG00000037295	Ldlrap1	-0.5601678691307493	-0.31407805067797406	-0.12982276097815695	yes
ENSMUSG00000037410	Tbc1d2b	0.40452581819446026	0.2702589521020352	0.3386503410394827	no
ENSMUSG00000037553	Zdhhc18	-0.1888750157880007	-0.09387156800851461	-0.15511219079783148	yes
ENSMUSG00000037731	Themis2	-0.3593780400939715	-0.21324643548003283	-0.09333918923947723	yes
ENSMUSG00000037788	Vopp1	0.5650039853186146	0.260385794147861	0.3063274549096171	yes
ENSMUSG00000037855	Zfp365	1.90141e+16	1.35377e+16	0.8005999335374893	yes
ENSMUSG00000037992	Rara	-0.361141707922307	-0.2255279789703289	-0.5065146742717679	yes
ENSMUSG00000038055	Dexi	0.39364713208197855	0.5113206161778373	0.2355080497308511	yes
ENSMUSG00000038058	Nod1	-0.34356692762285834	-0.18426099612232674	-0.25073840598507746	yes
ENSMUSG00000038623	Tm6sf1	-0.22398132798522935	-0.0936525864030621	-0.16632348466823296	no
ENSMUSG00000038807	Rap1gap2	-1281643030831910	-0.6192889647721647	-0.3905316082016316	yes
ENSMUSG00000038884	A230050P20Rik	0.22793044097439993	0.12555817196183863	0.26551967936506576	no
ENSMUSG00000038936	Sccpdh	0.6282706813712157	0.4664239298855611	0.2297550822075058	no
ENSMUSG00000039157	Fam102a	-0.2974729302954303	-0.19826846886634447	-0.2934554000481155	yes
ENSMUSG00000039621	Prex1	-0.4094901146255129	-0.22300638489057875	-0.21527570635171733	yes
ENSMUSG00000039637	Coro7	-0.3486014516368943	-0.19007799599875097	-0.2694374267391676	yes
ENSMUSG00000039747	Orai2	-0.24892081539727834	-0.09042586399727676	-0.09317197623178662	no
ENSMUSG00000039783	Kmo	-0.21503587309187897	-0.2156686829862642	-0.2247429967599983	yes
ENSMUSG00000039849	Pcif1	-0.1716894326806797	-0.10086519238591352	-0.164887974518013	no
ENSMUSG00000039953	Clstn1	0.9496721993505132	1.0771e+16	1.60107e+16	yes
ENSMUSG00000040327	Cul9	0.32173947834863065	0.3971683674725038	0.7636530889516807	no
ENSMUSG00000040345	Arhgap9	-0.630961077844558	-0.18254941951838363	-0.2787960569114405	yes
ENSMUSG00000040415	Dtx3	0.38345272302682903	0.16690314631246952	0.5006200832877266	yes
ENSMUSG00000041164	Zmiz2	-0.15690851175602052	-0.08508647730083416	-0.17131687212188454	no
ENSMUSG00000041654	Slc39a11	1.02518e+16	0.4557981780232621	0.35492681899177836	yes
ENSMUSG00000041757	Plekha6	-1.07654e+16	-1029578627994760	-0.3112999621314509	no
ENSMUSG00000041954	Tnfrsf18	-0.6207073712968826	-0.2704728284612731	-0.1126489563703848	no
ENSMUSG00000042046	Dstyk	-0.2938016995035661	-0.161585723843265	-0.21440040644173988	yes
ENSMUSG00000042453	Reln	1.60381e+16	0.942773696555476	1.87406e+16	yes
ENSMUSG00000042500	Ago4	-0.5136411671521818	-0.2578238818169095	-0.07906349207078917	no
ENSMUSG00000042524	Sun2	-0.2130207946122161	-0.07948483459965364	-0.18620636157062978	yes
ENSMUSG00000042708	Shcbp1l	-0.7812044829665971	-0.6023089433972196	-0.5549883939927464	yes
ENSMUSG00000043102	Qrfp	-0.7695682030155888	-0.29961027511755467	-0.15603052465933254	no
ENSMUSG00000043384	Gprasp1	0.32409501231853655	0.18797132433266112	0.21645908766915306	yes
ENSMUSG00000043592	Unc5cl	-1.05267e+16	-0.30899167591968096	-0.18935007593198255	yes
ENSMUSG00000043885	Slc36a4	0.8480111550427072	0.4492924074192068	0.8385540044559604	yes
ENSMUSG00000044156	Hepacam2	-0.5603016352333313	-0.6243731851103921	-0.3432352726349914	yes
ENSMUSG00000044197	Gpr146	-0.45543054823468054	-0.15296600171915078	-0.19930357387891035	yes
ENSMUSG00000044770	Scml4	-0.2832437009043377	-0.17711819586547944	-0.22445643972624993	yes
ENSMUSG00000045103	Dmd	10449477883342	0.9633983658528035	0.6163131854955161	no
ENSMUSG00000045969	Ing1	-0.3253040200518945	-0.15657405034105337	-0.20093558458374297	yes
ENSMUSG00000046329	Slc25a23	0.4483252861320785	0.2514794161082897	0.09166710111633543	no
ENSMUSG00000046417	Lrrc75a	-1.06618e+16	-0.3857343618109082	-0.9232323890172561	yes
ENSMUSG00000047146	Tet1	0.7130061704322224	0.650810357038134	0.8604076980252763	no
ENSMUSG00000047180	Neurl3	-0.2192717973782351	-0.2528283341941937	-0.2617274475707397	yes
ENSMUSG00000048264	Dip2c	1.12036e+16	0.8395350437262598	1.15933e+16	yes
ENSMUSG00000048612	Myof	-0.7462623467576466	-0.6018226603246679	-0.1511078171569457	yes
ENSMUSG00000048756	Foxo3	-0.17508146059805604	-0.16530869177386198	-0.14101570690827206	no
ENSMUSG00000049588	Ccdc69	-0.41394175745570794	-0.2713297397825793	-0.14199772755763687	yes
ENSMUSG00000050022	Amz1	-1313566079864160	-0.727725710802564	-0.30391829528676945	yes
ENSMUSG00000050822	Slc29a4	0.8247218315514686	0.47117019105066893	0.5128884280285815	yes
ENSMUSG00000051344	Plekhm3	-0.35227369734345004	-0.1933521696806793	-0.17249652509745178	yes
ENSMUSG00000051998	Lax1	-0.4194391923237028	-0.20614094939626224	-0.24728144996984192	yes
ENSMUSG00000052062	Pard3b	1.34882e+16	0.35856285883503214	1310113512207730	yes
ENSMUSG00000052087	Rgs14	-0.30368063454524996	-0.1139601785401267	-0.11746793364542148	yes
ENSMUSG00000052534	Pbx1	0.5035224182130805	0.3839485207862711	0.25652751703819937	yes
ENSMUSG00000052539	Magi3	0.5173093613653715	0.22382258465284982	0.10838850846878385	no
ENSMUSG00000052609	Plekhg3	-0.61821604496718	-0.6373219324779678	-0.30208007550956856	yes
ENSMUSG00000052949	Rnf157	-0.6443737235557214	-0.29526825274728824	-0.6492408184231131	yes
ENSMUSG00000053063	Clec12a	-0.6778781396268708	-0.5651008017781922	-0.26459101415829384	yes
ENSMUSG00000053175	Bcl3	-0.3653608449655267	-0.2580797195804586	-0.42865229709860825	yes
ENSMUSG00000053580	Tanc2	0.6849367749074685	0.5842623447539573	0.4105670667822905	yes
ENSMUSG00000054008	Ndst1	-0.5442423700617958	-0.254806029580329	-0.11311097125773277	yes
ENSMUSG00000054428	Atpif1	0.3187382576351971	0.198979913284826	0.09065585890478665	no
ENSMUSG00000054499	Dedd2	-0.4745461773853411	-0.5016319237857491	-0.17189023135517098	yes
ENSMUSG00000055493	Epm2a	1.21068e+16	0.9495454390344776	1.4158e+16	no
ENSMUSG00000056220	Pla2g4a	1.20499e+16	1.1654e+16	0.5713897979177363	no
ENSMUSG00000056413	Adap1	-0.8656562958539743	-0.2816570959507362	-0.30325673315959545	yes
ENSMUSG00000056724	Nbeal2	-0.41556418737709455	-0.10567281823581566	-0.22795038950902088	no
ENSMUSG00000057135	Scimp	-1040757486071890	-0.5656506428047757	-0.4365121128025746	yes
ENSMUSG00000057963	Itpk1	-0.37418024484491036	-0.23247745176509077	-0.12554697439410067	yes
ENSMUSG00000058099	Nfam1	-0.6136124600332732	-0.22801444962276082	-0.11655326989683754	yes
ENSMUSG00000059013	Sh2d3c	-0.25264367409407196	-0.13172128261251131	-0.11578408836245029	yes
ENSMUSG00000059248	2009-09-01	-0.6699972027245604	-0.317001048942954	-0.5181064407345453	yes
ENSMUSG00000059495	Arhgef12	0.6651748033855578	0.7240178740967543	0.8185033440652301	yes
ENSMUSG00000059994	Fcrl1	-0.2391272517158737	-0.10147485596072488	-0.136707313520706	yes
ENSMUSG00000061311	Rag1	1.41916e+16	1.44482e+16	1.14612e+16	yes
ENSMUSG00000062939	Stat4	-0.31466636080443655	-0.2063437962647482	-0.4877119210126029	yes
ENSMUSG00000063972	Nr6a1	1044722037873310	0.6133043909541348	0.3711673226716399	yes
ENSMUSG00000068105	Tnfrsf13c	-0.24365353259394043	-0.19094129482074243	-0.35541762297992513	yes
ENSMUSG00000068284	Gm608	-0.1917199397852229	-0.11337944534664611	-0.10148166487025875	no
ENSMUSG00000069094	Pde7a	-0.23159476724365957	-0.17363595926876166	-0.2744603797246672	no
ENSMUSG00000071064	Zfp827	0.6537221144804084	0.5906340618810778	0.4598117139646426	yes
ENSMUSG00000073643	Wdfy1	-0.24670529687698717	-0.20516660723525446	-0.1562322643562762	no
ENSMUSG00000074063	Osgin1	-1.017e+16	-0.4991324842400197	-0.38660020659581423	no
ENSMUSG00000075254	Heg1	-0.24507268556323805	-0.12959261525767374	-0.05141606628303136	no
ENSMUSG00000075289	Carns1	-0.31783264866072486	-0.23982273081617211	-0.30119752524353427	yes
ENSMUSG00000075595	Zfp652	-0.17637161895054448	-0.08305934436379402	-0.28876841452153396	no
ENSMUSG00000076939	character(0)	0.3374689733853191	0.19268347225924953	0.5634435013226449	no
ENSMUSG00000089942	Pira2	-0.4677186860616567	-0.42113472928079987	-0.3166722712842993	no
ENSMUSG00000090272	Mndal	0.19166720701604492	0.11403057770276968	0.100459217942345	no
ENSMUSG00000093954	Gm28049	-0.6036053586783834	-0.42730829038197093	-0.13195966884062996	yes
ENSMUSG00000094951	character(0)	0.704463173457377	0.24399093406972175	0.30923735079954895	no
ENSMUSG00000095571	character(0)	0.40748597362157146	0.19932697914243172	0.3135890096689144	yes
ENSMUSG00000095612	character(0)	0.458600908107132	0.16704053921170203	0.21269308998282724	no
ENSMUSG00000098112	Bin2	-0.20331027533953855	-0.13465083034941658	-0.19363312383403591	yes
