# Supplementary material for: Leveraging the Mendelian disorders of the epigenetic machinery to systematically map functional epigenetic variation
Source: eLife journal article supplement (doi:10.7554/elife.65884), 2021-08-31
Supplement: supp [file elife-65884-supp-v1.zip › elife_poa_e65884_Figure_4_source_data_3.xlsx]

## Sheet: KS1_diff_acc_and_diff_expr
motif_name	odds_ratio	p_value
NFKB/1	1.53289	0.00723581
AIRE	1.48721	0.0130918
NFKB/2	1.44137	0.00195454
SPI	1.43135	0.0416179
SCRT1	1.41119	0.00521116
SNAI2	1.39922	0.0120334
REL-halfsite	1.37	0.0382107
PRDM1	1.3535	0.0146262
BCL6/2	1.35318	0.0114298
OCT4+SOX2	1.35016	0.0145596
STAT/2	1.34825	0.0377146
NFAT/1	1.27535	0.0452349

## Sheet: KS2_diff_acc_and_diff_expr
motif_name	odds_ratio	p_value
NFI/3	1.78687	0.00881609
ARI5B	1.68851	0.00245549
PRDM16	1.56841	0.0139379
ZNF431	1.44016	0.0082666
SNAI2	1.42764	0.026797
MIES	1.37593	0.0418085

## Sheet: RT1_diff_acc_and_diff_expr
motif_name	odds_ratio	p_value
CUX/4	1.69969	0.00257806
HD/10	1.53027	0.00343467
SOX/1	1.45506	0.00753166
SOX/2	1.42584	0.0075018
THAP1	1.40572	0.00330581
ZNF423	1.35606	0.00346478
AP1/2	1.35121	0.0363494
NFKB/2	1.34851	0.0038747
MECP2	1.33963	0.0129546
BATF	1.30368	0.0129274
ZNF680	1.29568	0.0130037
ZNF134	1.28568	0.0214712
NFAT/1	1.28423	0.0180494
AHR	1.28217	0.0161301
MIES	1.28145	0.0291883
HD/16	1.27858	0.0291135
Ebox/CATATG	1.24892	0.037077
PAX/1	1.24716	0.0318633
ZNF257	1.24639	0.0393777
ZKSCAN1	1.2447	0.0354865
CENBP	1.24273	0.042091
GFI	1.22946	0.0457293

## Sheet: KS1_diff_expr_only
motif_name	odds_ratio	p_value
ETS/2	2.33244	0.00716283
SPI	1.55162	1.56149e-05
ARI5B	1.53996	1.7218e-06
RUNX/1	1.3938	0.000240242
TBX/1	1.37771	7.91532e-06
AP1/1	1.37537	1.08026e-05
EWSR1/FLI1	1.35384	3.78671e-05
IRF/2	1.3482	0.0259614
Ebox/CATATG	1.33456	6.67909e-05
ZNF490	1.33182	0.0486233
SNAI2	1.32212	0.000274784
ZSCAN4	1.32048	7.31061e-05
ZNF431	1.3173	6.70155e-05
ZNF586	1.31688	0.00181555
MAF	1.30567	0.000950099
POU/1	1.29418	0.00034879
ZNF250	1.29185	0.0206494
REL-halfsite	1.28347	0.00360614
HD/14	1.27588	0.00342733
ZIM3	1.27588	0.000716707
HD/15	1.27412	0.00731108
NR/19	1.27354	0.0333842
NFAT/1	1.26972	0.000641165
HD/10	1.26699	0.0227656
ZNF28	1.26576	0.000717367
BATF	1.2534	0.00162324
OCT4+SOX2	1.24926	0.00208278
SMARCA1	1.24912	0.00189532
FOX/1	1.23563	0.00978545
NFAC/2	1.22828	0.00485869
NFKB/3	1.22172	0.00381468
ZNF708	1.21185	0.00677999
ZNF41	1.20365	0.00889266
NFKB/2	1.2035	0.00734686
ZNF384/2	1.20192	0.019062
TEAD	1.19017	0.0119973
FOX/4	1.18915	0.0362849
GFI	1.18697	0.0128548
CREB/ATF/3	1.1838	0.0335225
POU/3	1.18126	0.0271033
HD/2	1.17476	0.0320553
PRDM1	1.17336	0.0236417
HSF	1.17054	0.0225709
CCAAT/CEBP	1.16643	0.0264414
ZNF680	1.16251	0.0344671
NR/13	1.16196	0.0385249
ZNF282	1.16048	0.039151
BCL6/2	1.15865	0.0329711
HIC/1	1.1554	0.0455115
TCF/LEF	1.14951	0.0459644

## Sheet: KS2_diff_expr_only
motif_name	odds_ratio	p_value
ZNF490	1.63315	0.0217454
ZNF418	1.42873	0.00164276
GFI	1.40981	0.00235985
ZNF768	1.39504	0.0185587
ZNF24	1.3744	0.0322932
ZNF384/1	1.36407	0.0179959
ZIM3	1.35684	0.00868617
NR2E3	1.32948	0.0450823
ZNF708	1.30702	0.0232229
NFAC/2	1.28309	0.0408215
NFKB/3	1.27541	0.0329969
ZNF431	1.26514	0.04075
ZSCAN4	1.26111	0.0425177

## Sheet: RT1_diff_expr_only
motif_name	odds_ratio	p_value
SMAD	1.45228	0.00344421
SOX/6	1.38649	0.00869755
PRDM16	1.32671	1.66946e-06
MYB/1	1.32629	0.00371363
HD/25	1.30805	0.00121331
HD/10	1.30206	0.000174132
Ebox/CACCTG	1.29268	0.0044964
ZNF490	1.27549	0.0142933
EWSR1/FLI1	1.25664	4.74984e-06
NFKB/3	1.25486	1.08787e-06
ARI5B	1.25437	0.000330267
NFKB/2	1.25045	1.62767e-06
SOX/1	1.24987	0.0001978
CUX/4	1.24487	0.0144701
NFAT/1	1.24444	3.45123e-06
Ebox/CATATG	1.24053	1.14463e-05
NR/14	1.24001	0.00145197
SMARCA5	1.23652	6.48404e-05
POU/3	1.23425	2.41461e-05
MAF	1.23204	0.000125463
HD/5	1.23074	0.00583845
ZNF250	1.22615	0.00723876
HIC/1	1.22427	2.94272e-05
CUX/1	1.21537	0.00696795
ZIM3	1.21483	6.19742e-05
BATF	1.21278	6.49048e-05
HLTF	1.21215	0.000687735
DMRT1	1.21184	0.000300272
OCT4+SOX2	1.20417	0.000121676
TEAD	1.20364	7.19525e-05
HD/14	1.20147	0.00124566
AP1/1	1.20017	0.000174461
SOX/2	1.19926	0.00437502
TBX/1	1.19817	0.000167443
MIES	1.19409	0.000437507
ZNF28	1.19076	0.000207437
SNAI2	1.1876	0.00081935
RUNX/1	1.18476	0.00553003
ZNF431	1.18445	0.000303428
EVI1/MECOM	1.18439	0.0109597
FOX/1	1.18361	0.00215285
ZBTB48	1.18333	0.000451716
ZNF257	1.18271	0.00038177
NFKB/1	1.17804	0.0059914
ZNF680	1.1775	0.000606401
NR2E3	1.17395	0.0094427
SOX/4	1.1734	0.0147462
HD/21	1.17157	0.00270851
AP1/2	1.17076	0.0107141
SMARCA1	1.16821	0.00136843
POU/1	1.16639	0.00162009
HAND1	1.1649	0.00302223
ZNF449	1.16189	0.00475484
ZSCAN4	1.15862	0.00202688
ZKSCAN1	1.15848	0.00155484
FOX/5	1.15594	0.00225385
ZNF331	1.15366	0.0140588
ZNF317	1.15082	0.010304
NFI/2	1.15042	0.00275062
ZNF418	1.15018	0.00274111
HD/17	1.14955	0.0411168
GATA	1.14954	0.00361087
ZNF768	1.14733	0.0145601
ZNF41	1.14686	0.00445526
FOX/4	1.14422	0.0161042
ZNF382	1.14274	0.00658033
SCRT1	1.14217	0.00693381
PRDM1	1.14141	0.00561466
EBF1	1.13947	0.0232832
HD/15	1.13774	0.0339005
TBX/4	1.13771	0.0085288
REL-halfsite	1.13644	0.0277642
HIC/2	1.13602	0.00646413
NR/2	1.13452	0.019823
ZNF708	1.13378	0.00837812
BCL6/2	1.13203	0.00807688
CREB/ATF/3	1.13185	0.0207112
LEF1	1.12912	0.0334376
SPZ1	1.12847	0.0110985
ZNF136	1.12725	0.040966
MEF2	1.12502	0.0251099
NFAC/2	1.1241	0.0181162
GFI	1.12393	0.0120477
ZNF528	1.12371	0.0139748
ZNF436	1.12212	0.0137102
ZNF85	1.11824	0.0288476
TCF/LEF	1.11672	0.0178363
ZNF134	1.11468	0.0243271
GRHL	1.11274	0.0216152
GCM	1.11142	0.0229854
ZNF547	1.10799	0.0289118
HD/2	1.105	0.0489202
ZNF423	1.10126	0.0405605
