# Supplementary material for: Leveraging the Mendelian disorders of the epigenetic machinery to systematically map functional epigenetic variation
Source: eLife journal article supplement (doi:10.7554/elife.65884), 2021-08-31
Supplement: supp [file elife-65884-supp-v1.zip › elife_poa_e65884_Figure_5_source_data_1.xlsx]

## Sheet: Figure_5_Supp_Table_1
pathway	overrepresentation_pval
Mus musculus: Histidine, lysine, phenylalanine, tyrosine, proline and tryptophan metabolism	1.74652e+12
Mus musculus: Cytokine Signaling in Immune system	3.16537e+11
Mus musculus: Tryptophan catabolism	4.03234e+11
Mus musculus: Immune System	9.3006e+10
Mus musculus: TNF receptor superfamily (TNFSF) members mediating non-canonical NF-kB pathway	0.0017950706577324733
Mus musculus: Metabolism of lipids	0.0024393111592841887
Mus musculus: Orexin and neuropeptides FF and QRFP bind to their respective receptors	0.0031548851276422506
Mus musculus: Signaling by NODAL	0.0035241410948490984
Mus musculus: TNFR2 non-canonical NF-kB pathway	0.004529407822289888
Mus musculus: FOXO-mediated transcription	0.004731209528759589
Mus musculus: Signaling by Interleukins	0.005216445665994619
Mus musculus: FOXO-mediated transcription of cell cycle genes	0.006583665071619905
Mus musculus: Glycosphingolipid metabolism	0.006774055621531037
Mus musculus: Regulation of TP53 Activity through Association with Co-factors	0.007667032893994398
Mus musculus: Regulation of FOXO transcriptional activity by acetylation	0.007805580437759271
Mus musculus: Interleukin-35 Signalling	0.008534507564759672
Mus musculus: Hyaluronan metabolism	0.00918444574908848
Mus musculus: Phospholipid metabolism	0.012143258730290481
Mus musculus: Synthesis of PA	0.013475947917586445
Mus musculus: Interleukin-12 family signaling	0.017357866910343064
