# Supplementary material for: Leveraging the Mendelian disorders of the epigenetic machinery to systematically map functional epigenetic variation
Source: eLife journal article supplement (doi:10.7554/elife.65884), 2021-08-31
Supplement: supp [file elife-65884-supp-v1.zip › elife_poa_e65884_Figure_5_source_data_2.xlsx]

## Sheet: Figure_5_Supp_Table_2
pathway	overrepresentation_pval
Mus musculus: Integrin cell surface interactions	1.71157e+12
Mus musculus: Crosslinking of collagen fibrils	3.78273e+11
Mus musculus: Non-integrin membrane-ECM interactions	5.30117e+11
Mus musculus: PCP/CE pathway	5.78541e+11
Mus musculus: SUMOylation of intracellular receptors	9.88685e+10
Mus musculus: Signal Transduction	0.0010645418883064035
Mus musculus: Beta-catenin independent WNT signaling	0.0014530354278061688
Mus musculus: Nuclear Receptor transcription pathway	0.00163661385608824
Mus musculus: Signaling by Activin	0.0016526678298067461
Mus musculus: Extracellular matrix organization	0.002187076533198222
Mus musculus: Anchoring fibril formation	0.002292956410463307
Mus musculus: Laminin interactions	0.002423418512047399
Mus musculus: Rho GTPase cycle	0.0029482726906397043
Mus musculus: NRAGE signals death through JNK	0.0032585997278885047
Mus musculus: RUNX3 regulates YAP1-mediated transcription	0.003360970181199982
Mus musculus: Opioid Signalling	0.00400956956498472
Mus musculus: YAP1- and WWTR1 (TAZ)-stimulated gene expression	0.004411526892068494
Mus musculus: Synthesis of epoxy (EET) and dihydroxyeicosatrienoic acids (DHET)	0.004445740340578255
Mus musculus: Synthesis of (16-20)-hydroxyeicosatetraenoic acids (HETE)	0.0047395668162168
Mus musculus: Arachidonic acid metabolism	0.006345420997362629
