# Supplementary material for: Leveraging the Mendelian disorders of the epigenetic machinery to systematically map functional epigenetic variation
Source: eLife journal article supplement (doi:10.7554/elife.65884), 2021-08-31
Supplement: supp [file elife-65884-supp-v1.zip › elife_poa_e65884_Figure_5_source_data_3.xlsx]

## Sheet: Figure_5_Supp_Table_3
genotype	IgA
KS2	278294863
KS2	542893519
KS2	7347226469
KS2	953591159
wt	8709787138
KS2	2096111985
wt	6068432304
wt	3648976899
wt	4251151237
wt	7185319539
wt	7559321815
wt	5620574303
KS1	1550870767
KS1	1467577294
KS1	1918047095
KS1	44482336
KS1	2059679277
KS1	3747079395
wt	437275958
wt	5129076389
