# Supplementary figures and images for: Leveraging the Mendelian disorders of the epigenetic machinery to systematically map functional epigenetic variation
Source: eLife journal article supplement (doi:10.7554/elife.65884), 2021-08-31

Supplemental Figures

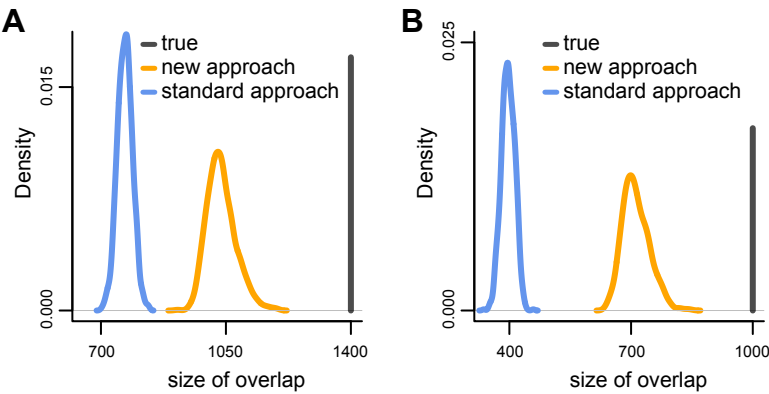

Supplement: supp [file elife-65884-supp-v1.zip › elife_poa_e65884_Figure_1_figure_supplement_1.pdf]

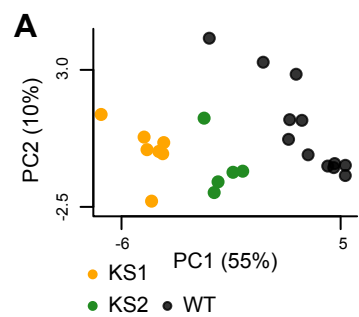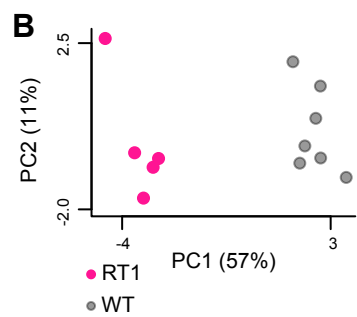

Supplement: supp [file elife-65884-supp-v1.zip › elife_poa_e65884_Figure_2_figure_supplement_1.pdf]

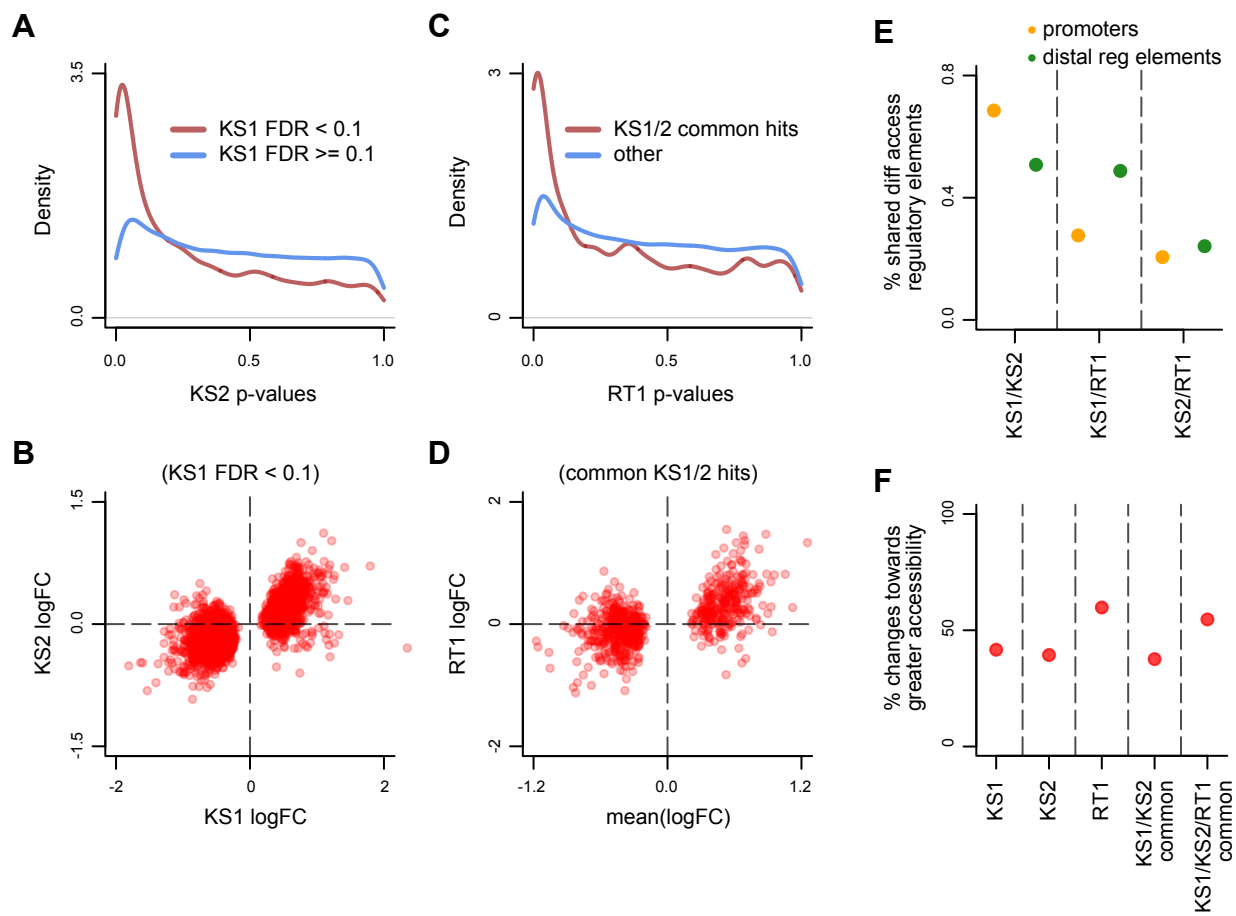

Supplement: supp [file elife-65884-supp-v1.zip › elife_poa_e65884_Figure_2_figure_supplement_2.pdf]

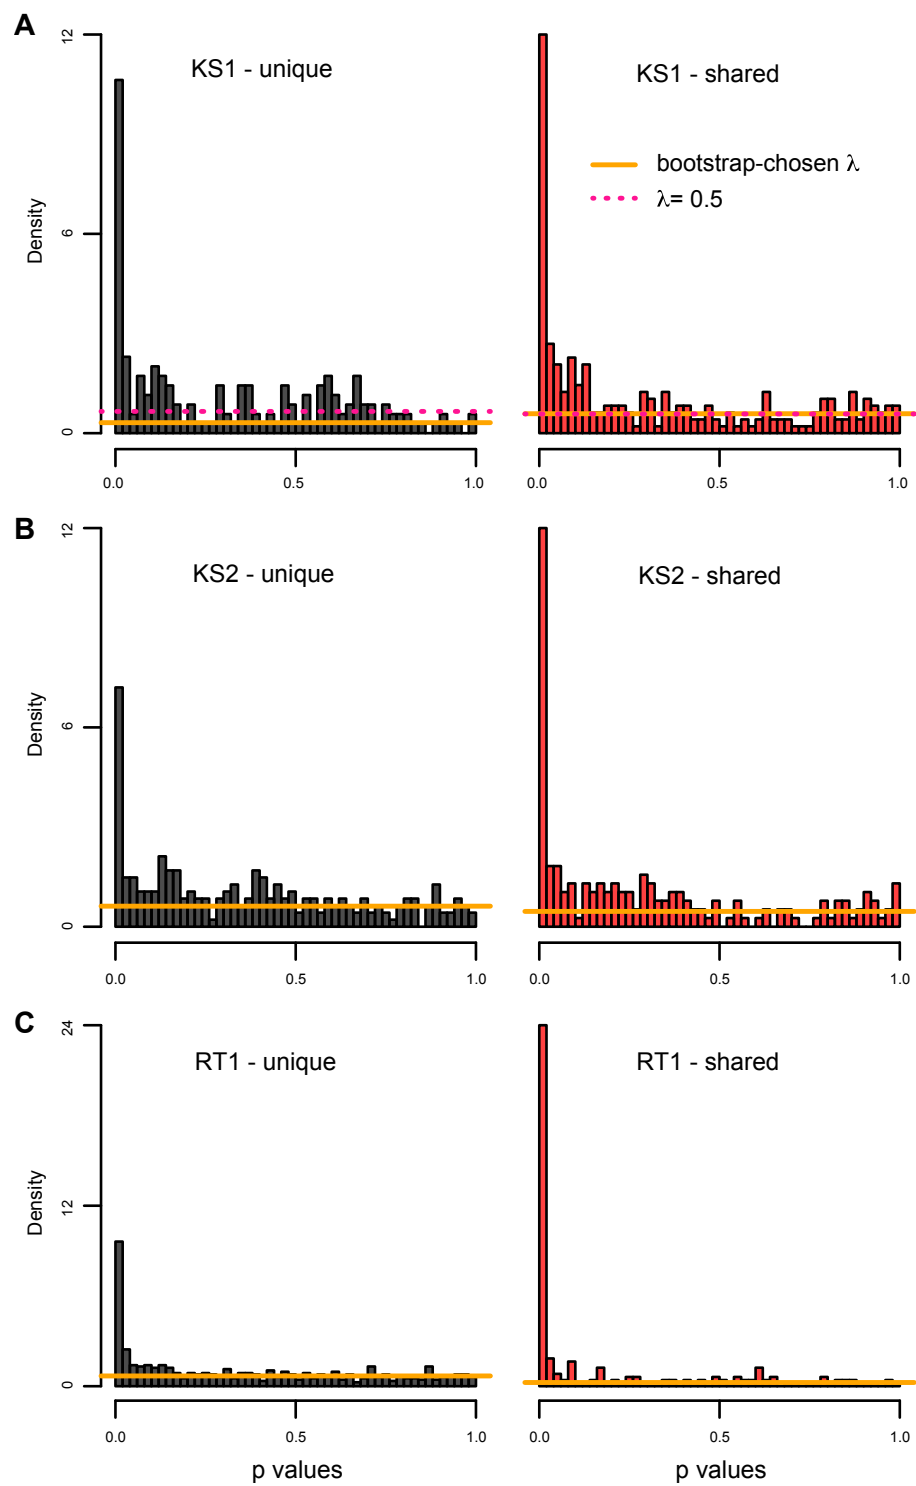

Supplement: supp [file elife-65884-supp-v1.zip › elife_poa_e65884_Figure_3_figure_supplement_1.pdf]

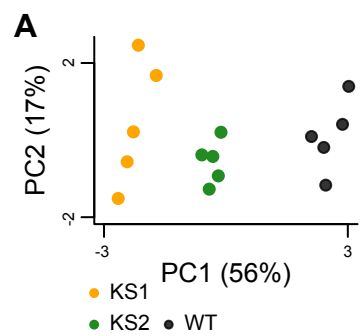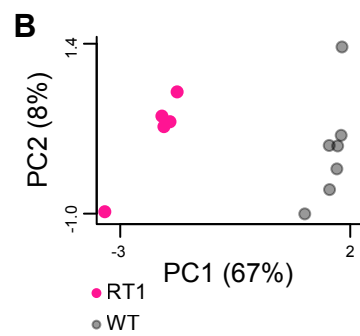

Supplement: supp [file elife-65884-supp-v1.zip › elife_poa_e65884_Figure_4_figure_supplement_1.pdf]
